# Supplementary material for: Gene silencing pathways found in the green alga Volvox carteri reveal insights into evolution and origins of small RNA systems in plants
Source: PubMed Central journal article supplement (PMC5093975; doi:10.1186/s12864-016-3202-4), 2016-11-02

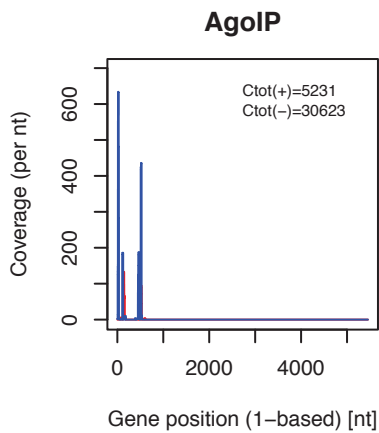

Copia2-I\_VC

Dueck\_FigS4

Red=plus strand  
Blue=minus strand

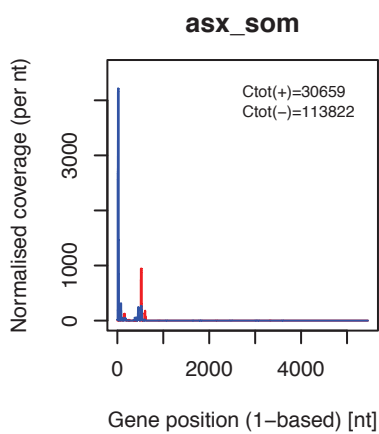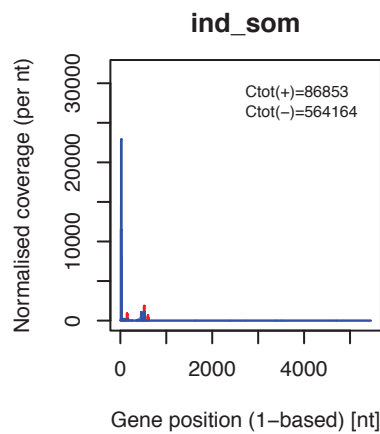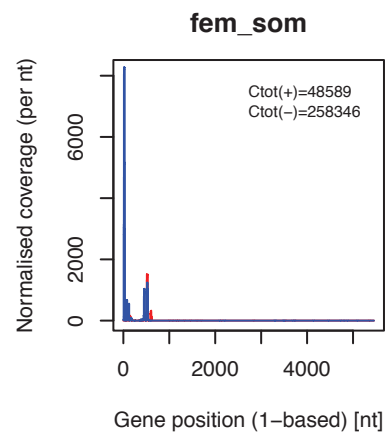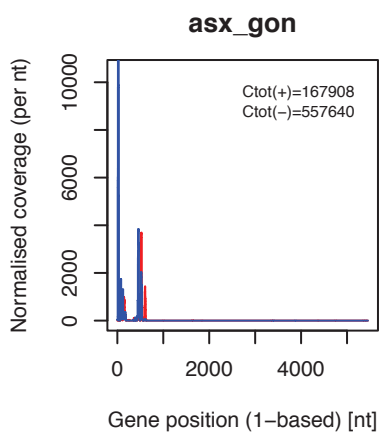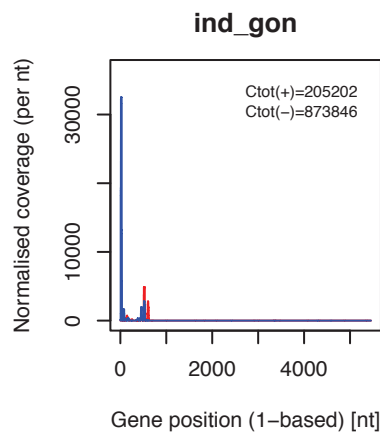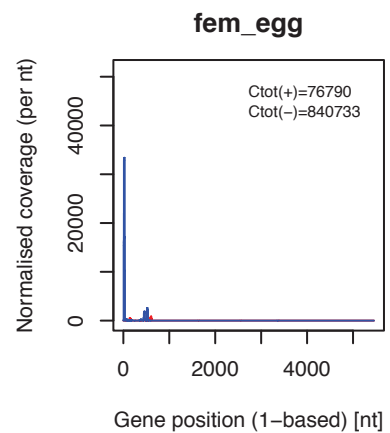

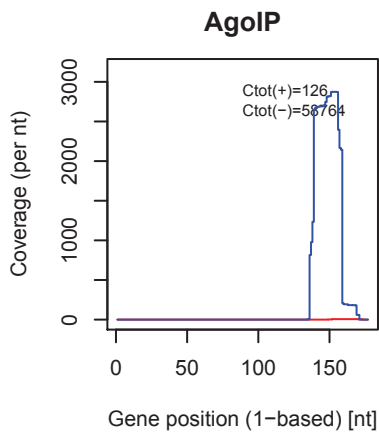

Copia2-LTR\_VC

Red=plus strand  
Blue=minus strand

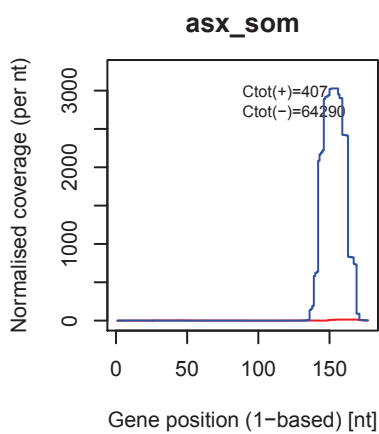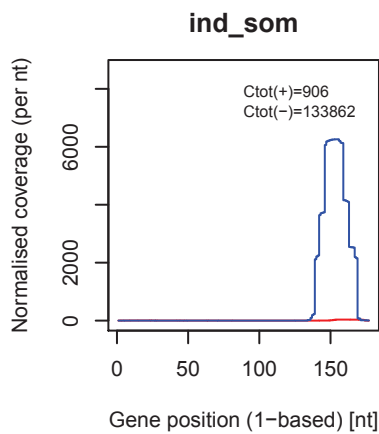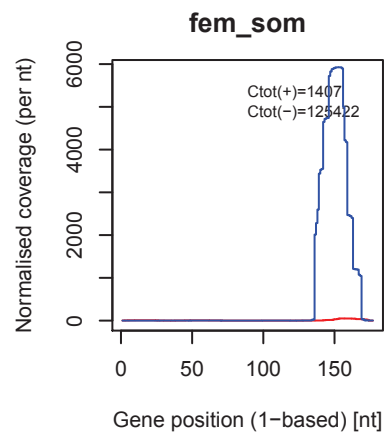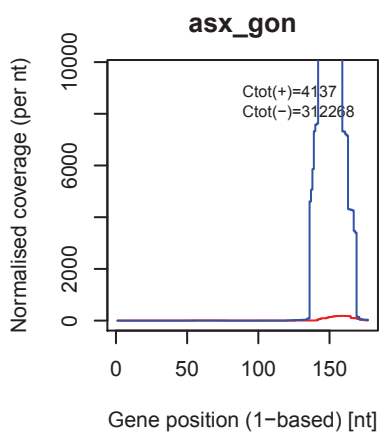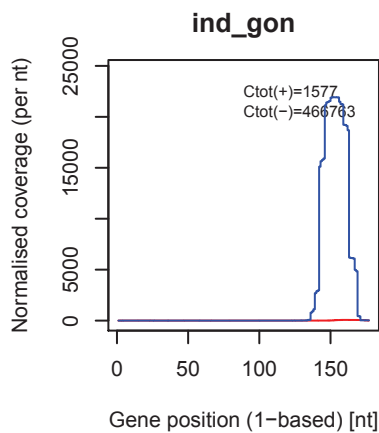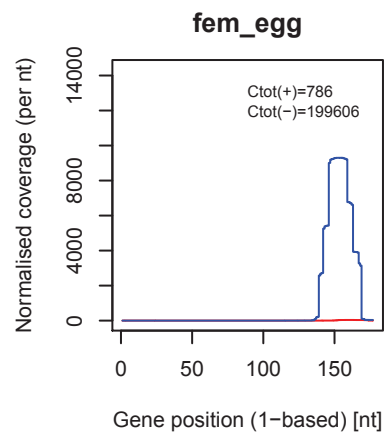

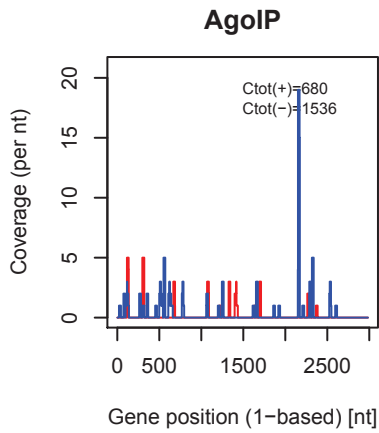

Copia3-I\_VC

Red=plus strand  
Blue=minus strand

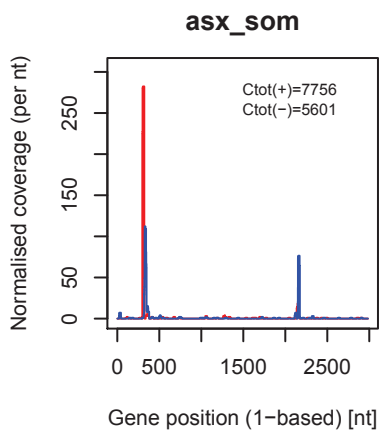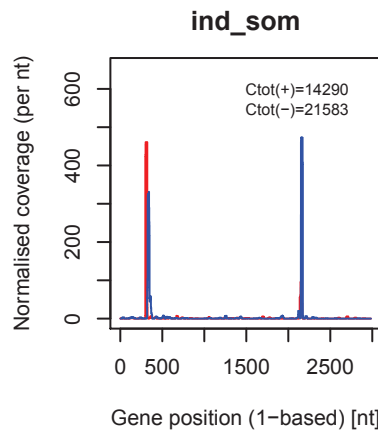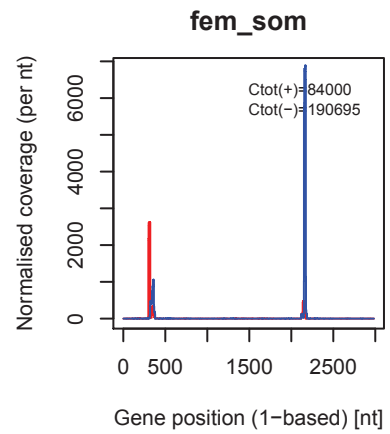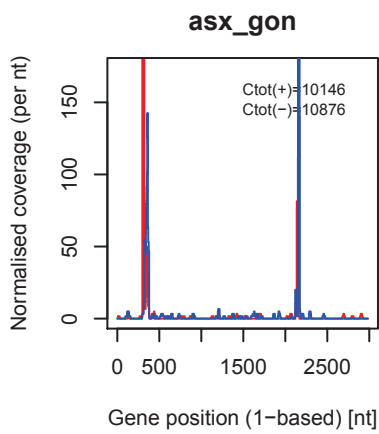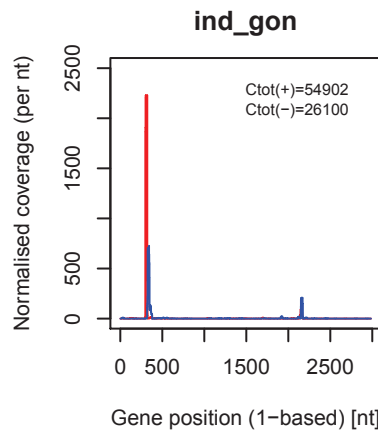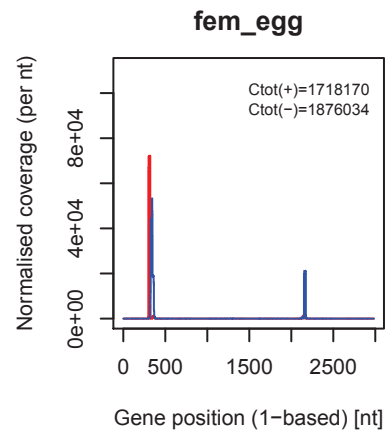

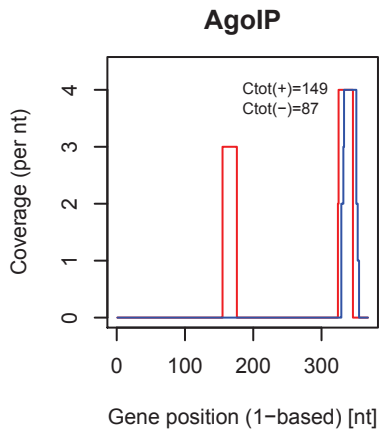

**Copia3-LTR\_VC**

Red=plus strand  
Blue=minus strand

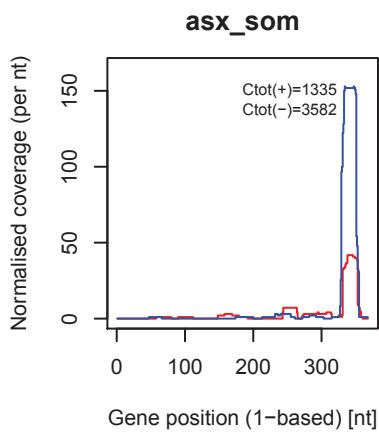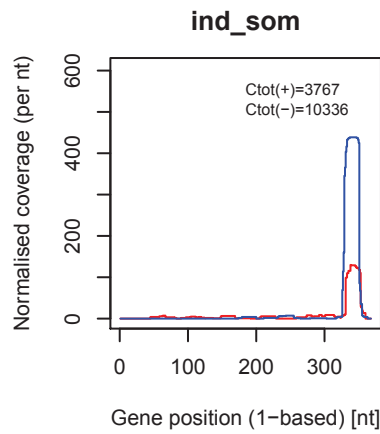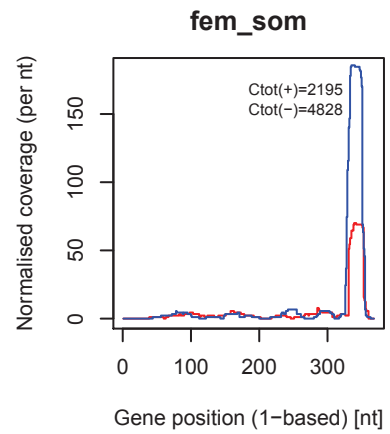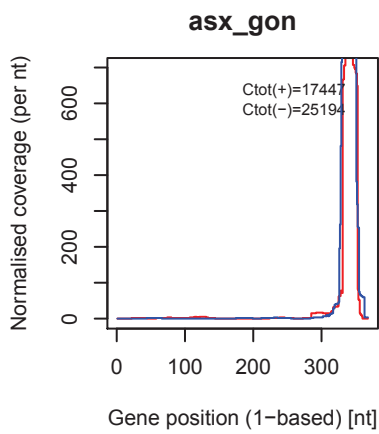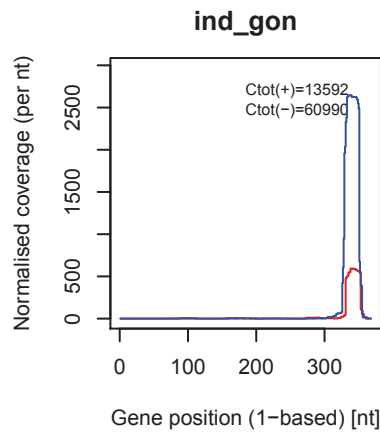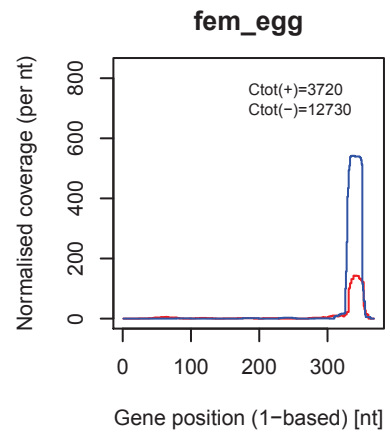

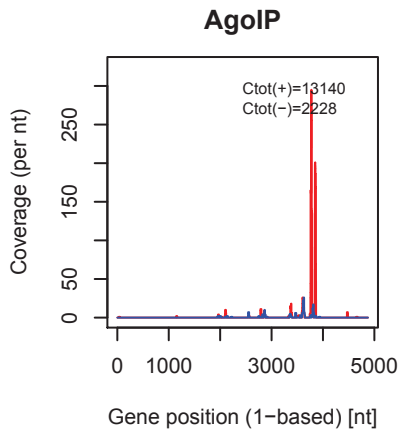

Copia4-I\_VC

Red=plus strand  
Blue=minus strand

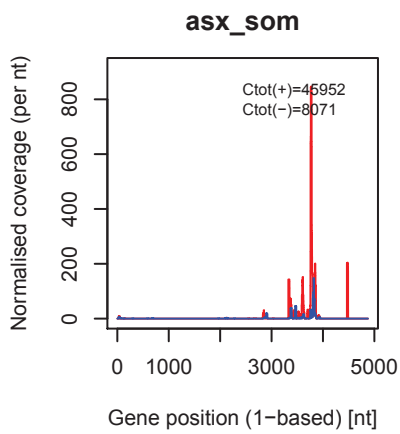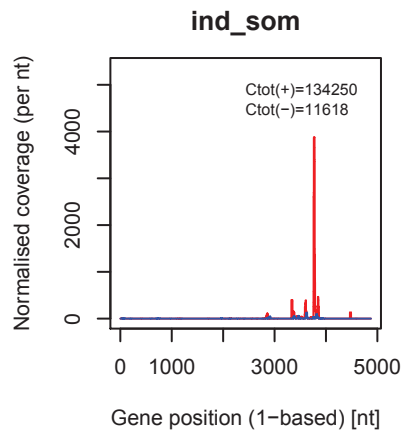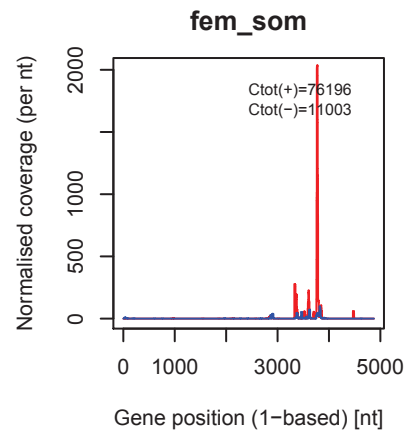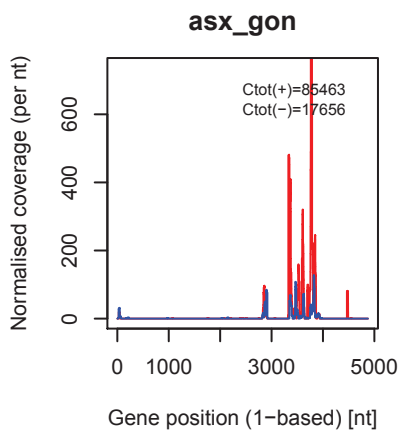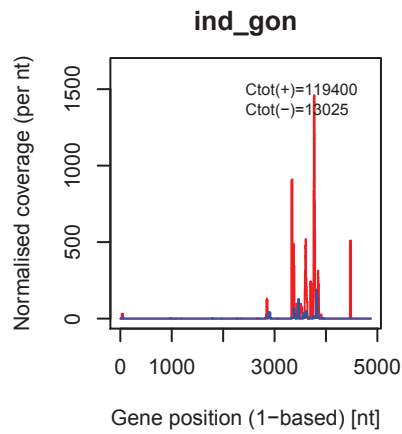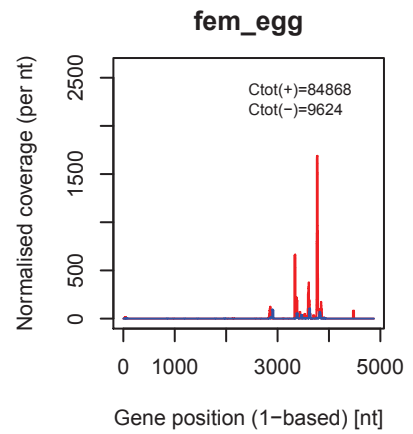

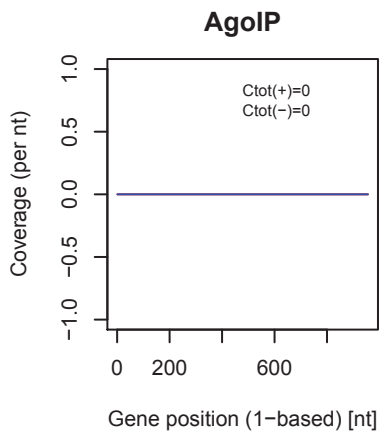

## Copia4-LTR\_VC

Red=plus strand  
Blue=minus strand

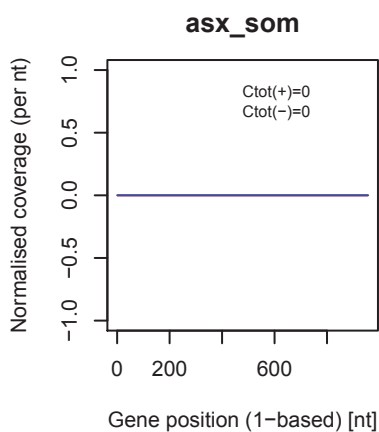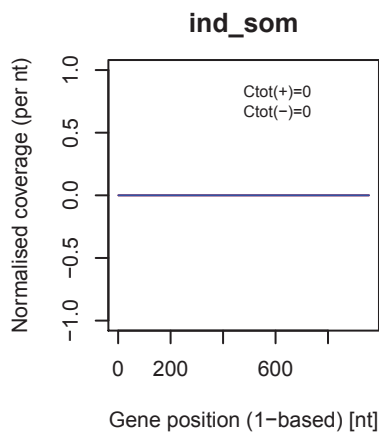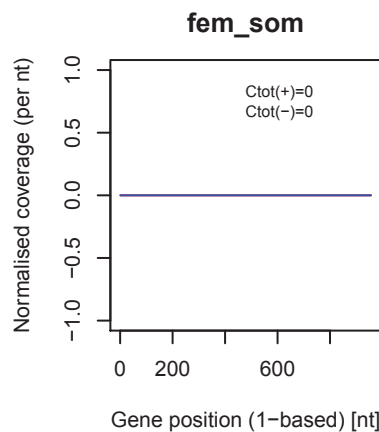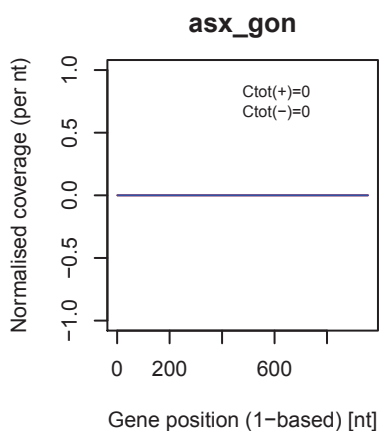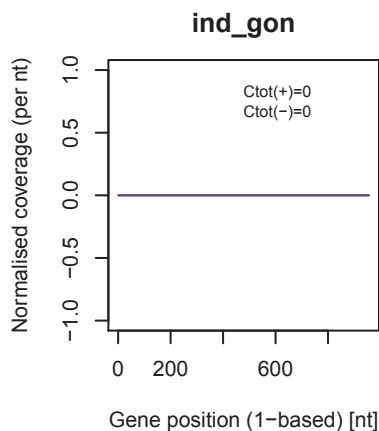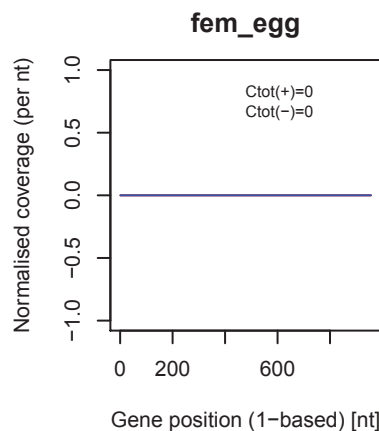

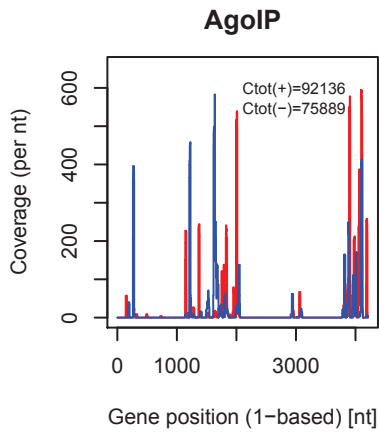

Copia6-I\_VC

Red=plus strand  
Blue=minus strand

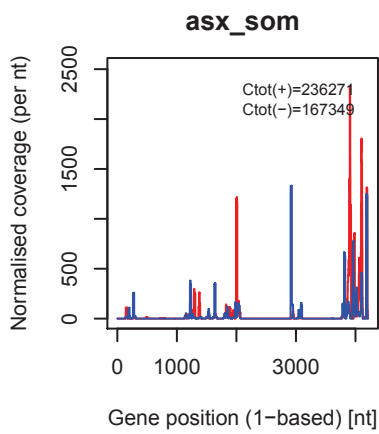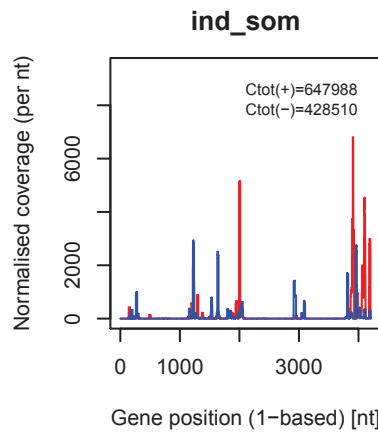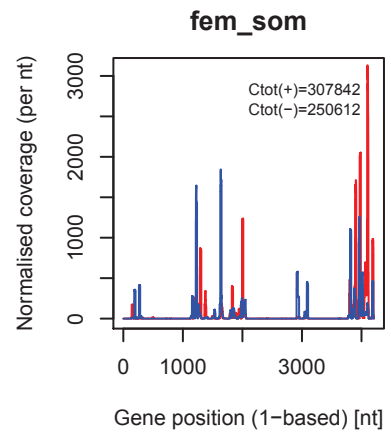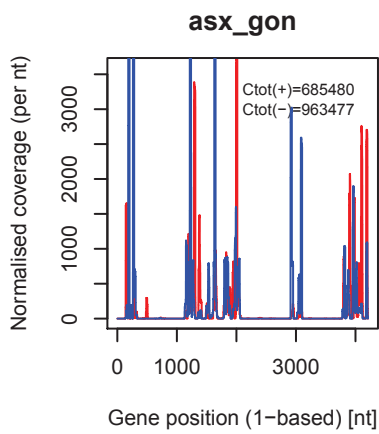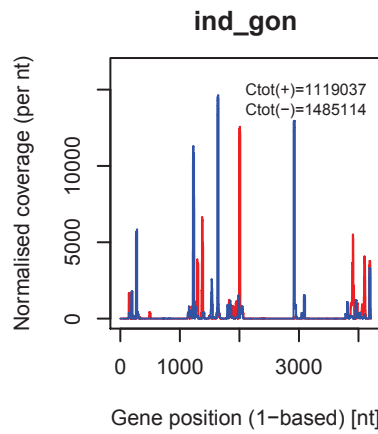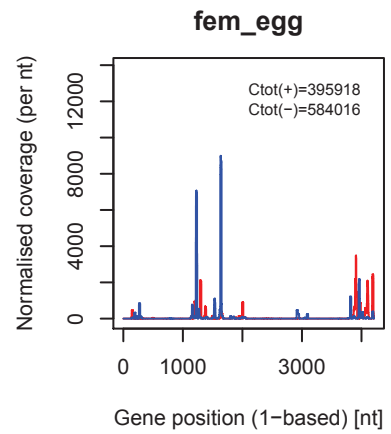

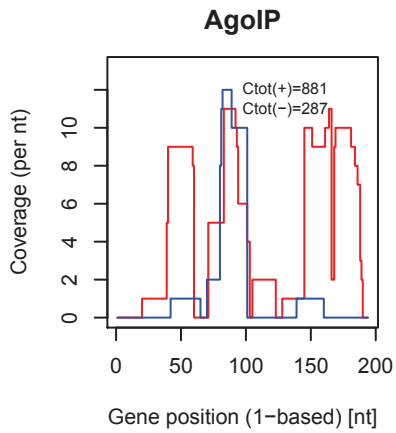

**Copia6-LTR\_VC**

Red=plus strand  
Blue=minus strand

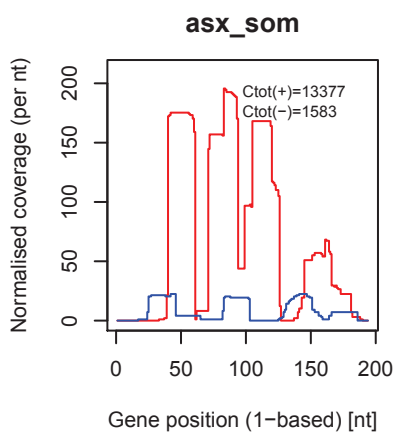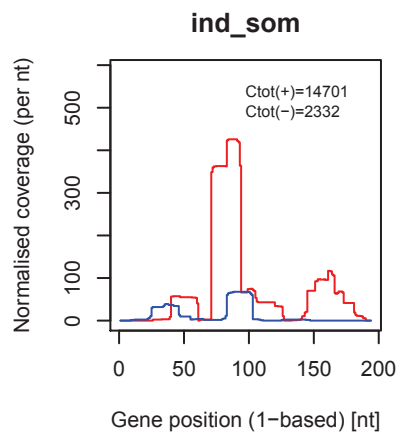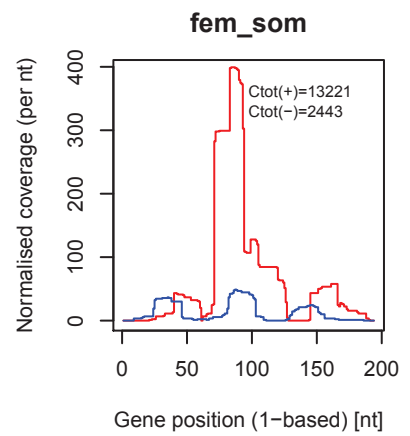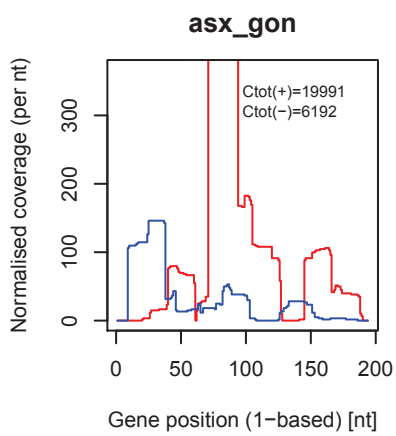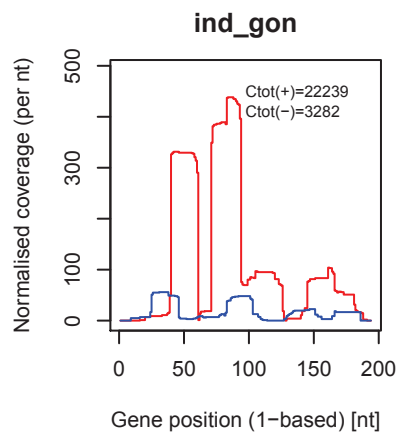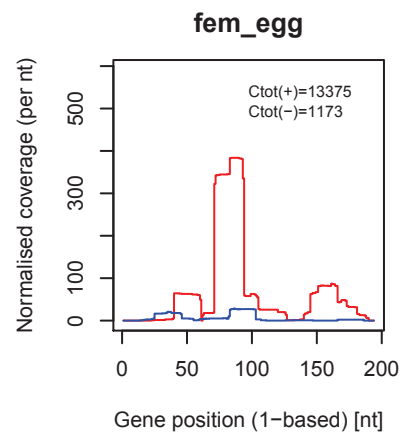



## Gypsy10-I\_VC

Red=plus strand  
Blue=minus strand

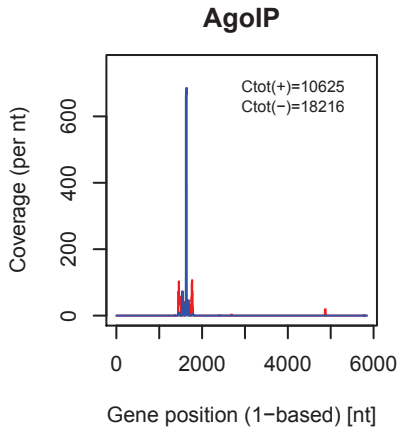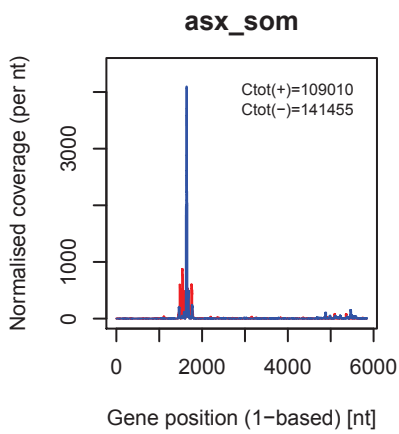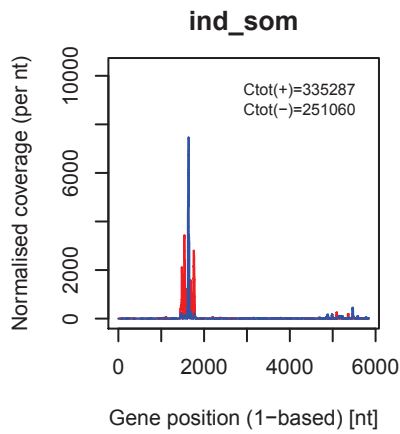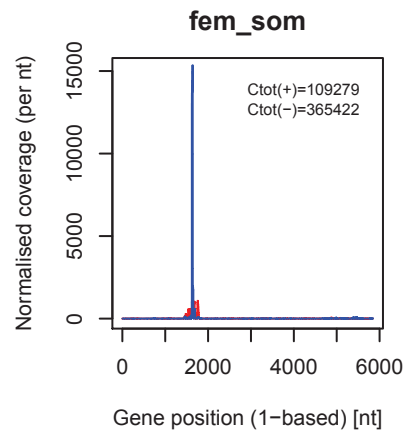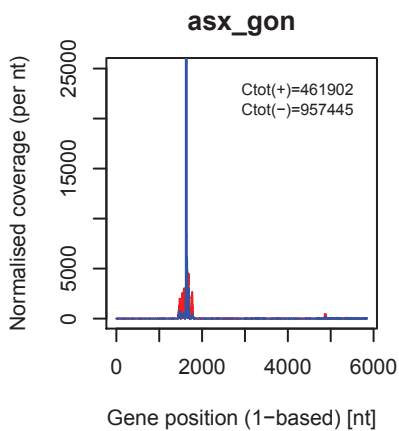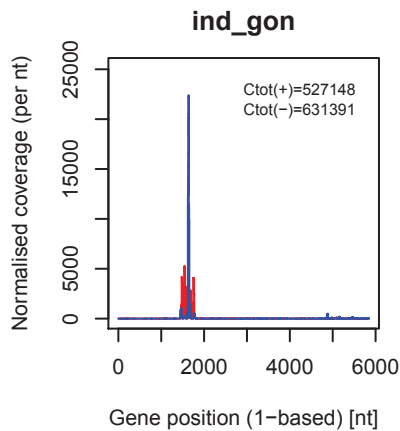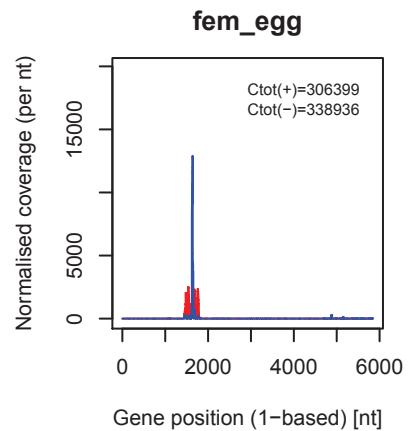

## Gypsy10-LTR\_VC

Red=plus strand  
Blue=minus strand

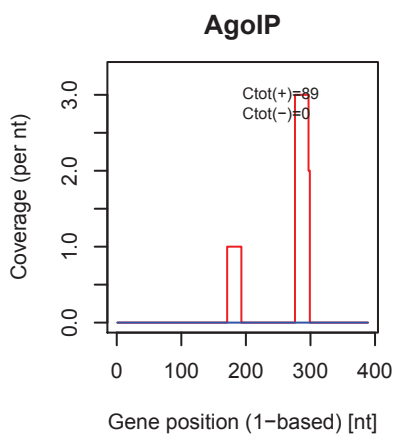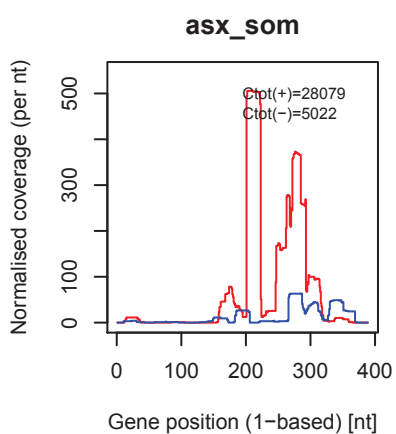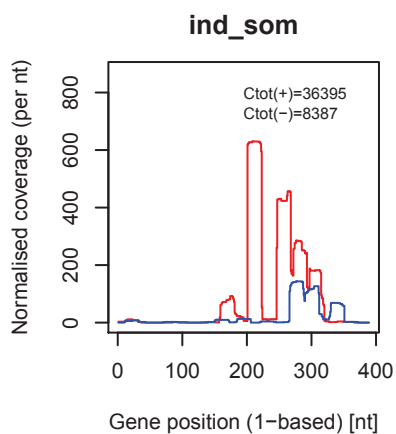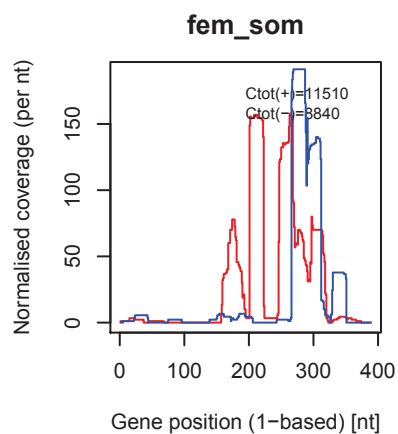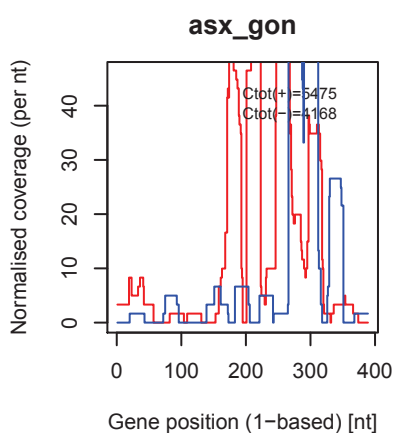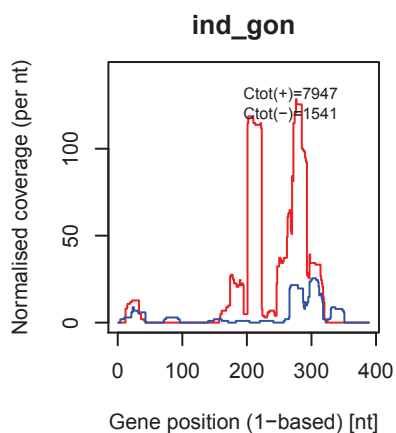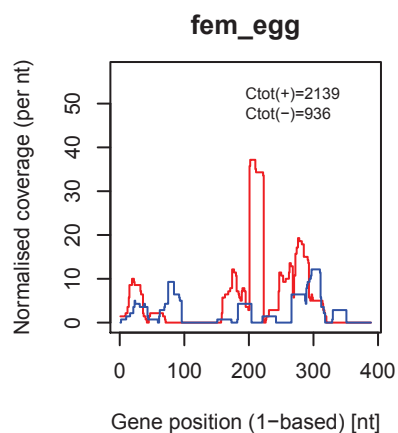

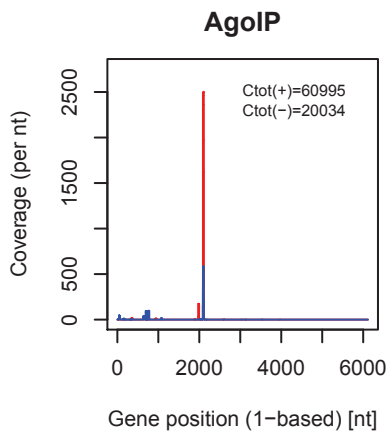

## Gypsy11-I\_VC

Red=plus strand  
Blue=minus strand

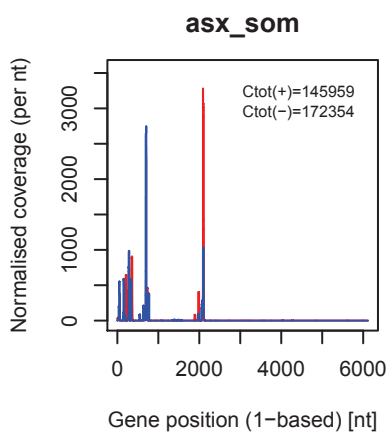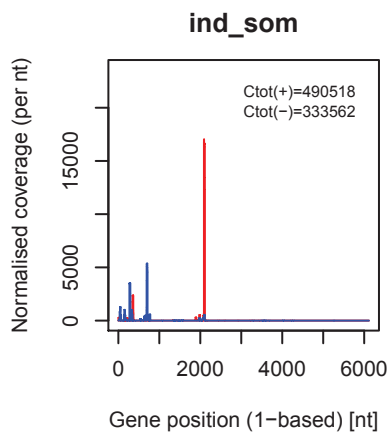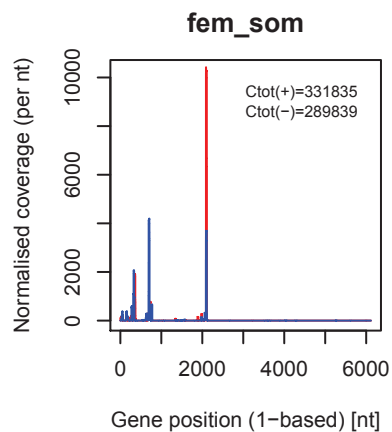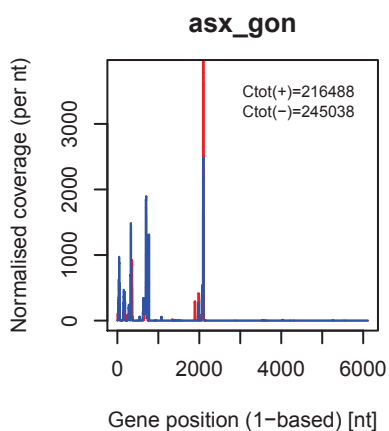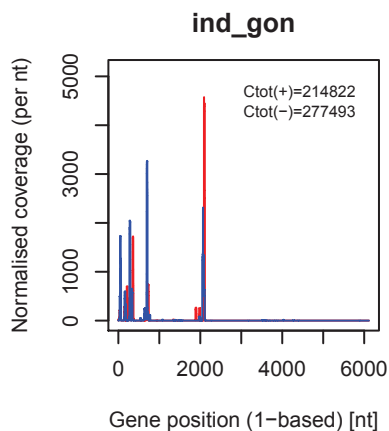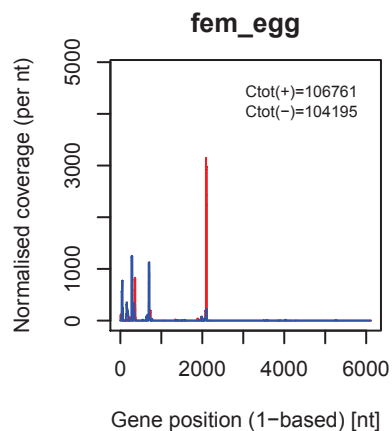

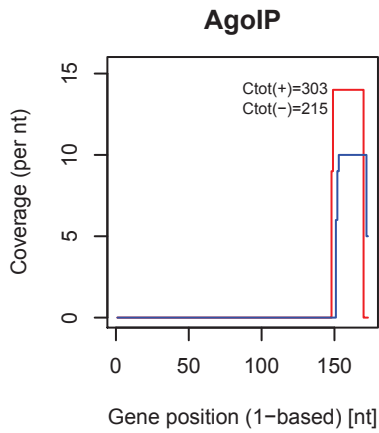

Gypsy11-LTR\_VC

Red=plus strand  
Blue=minus strand

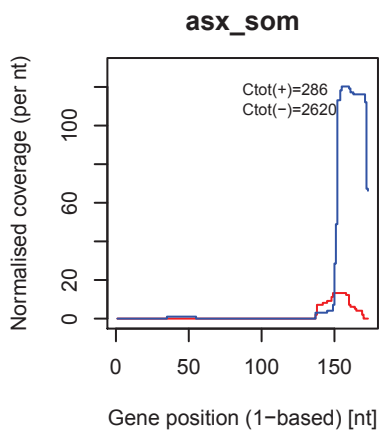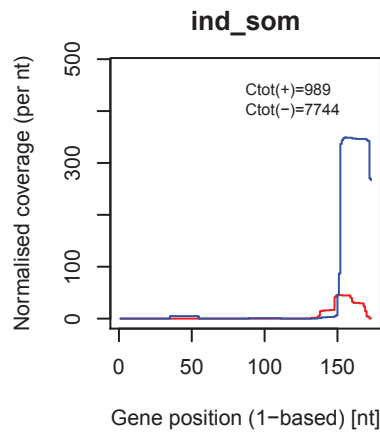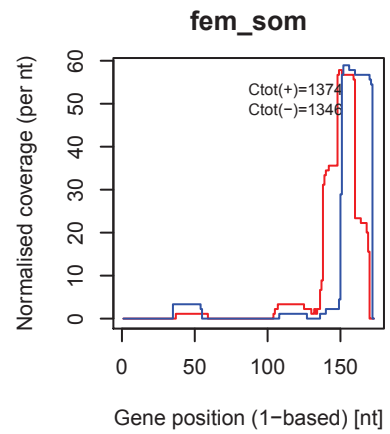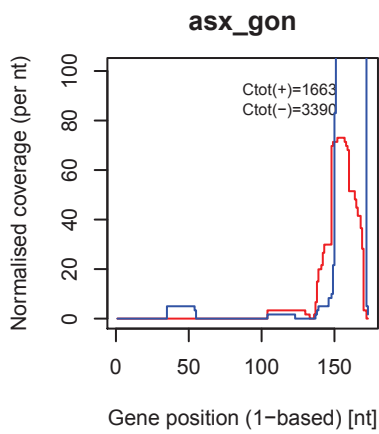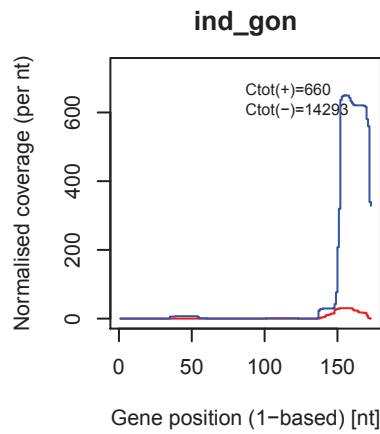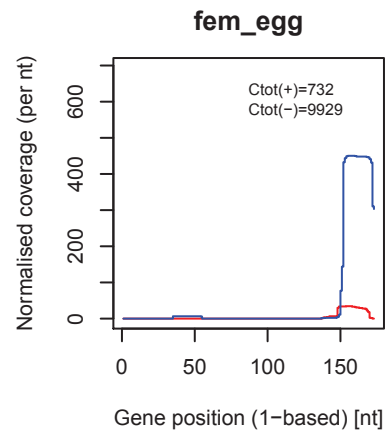

### AgolP

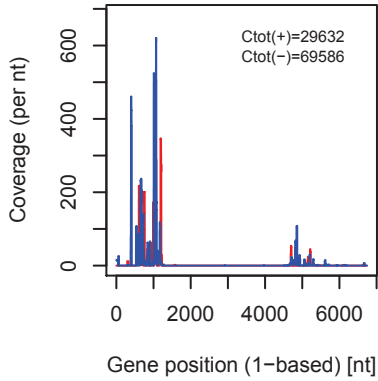

### Gypsy12-I\_VC

Red=plus strand  
Blue=minus strand

### asx\_som

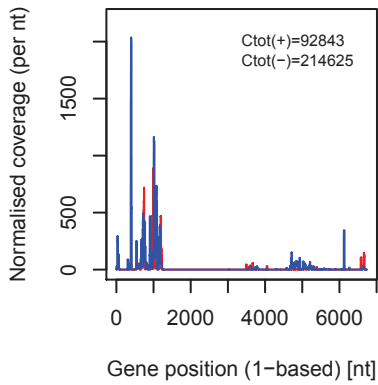

### ind\_som

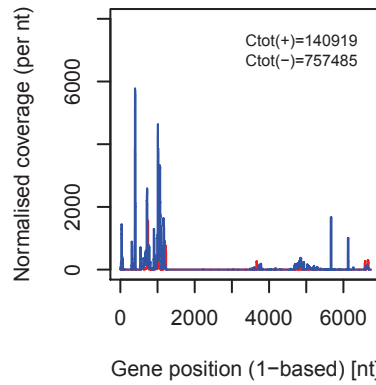

### fem\_som

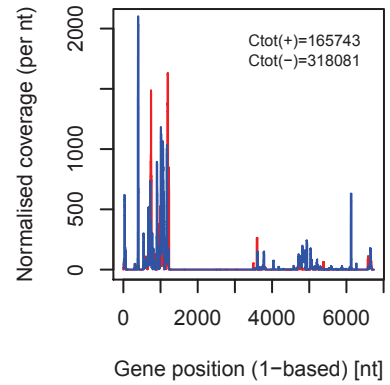

### asx\_gon

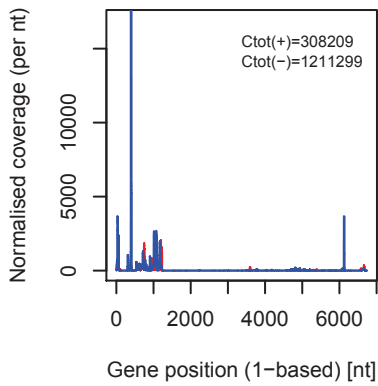

### ind\_gon

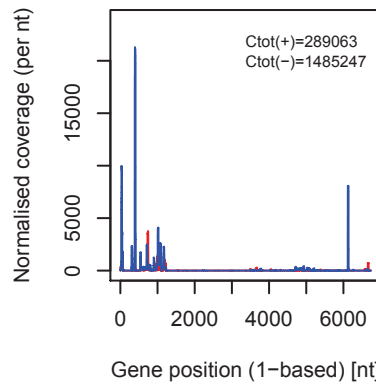

### fem\_egg

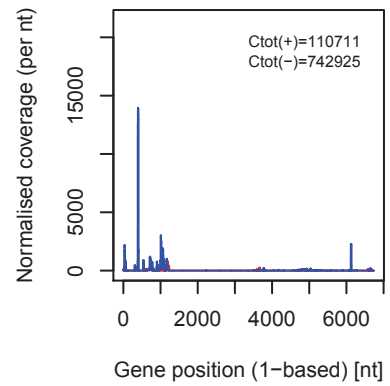

# Gypsy12-LTR\_VC

Red=plus strand  
Blue=minus strand

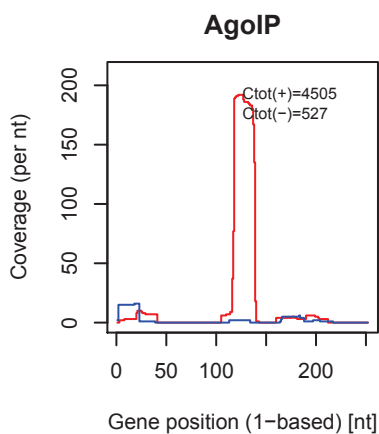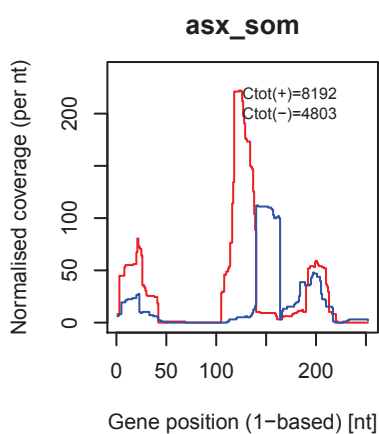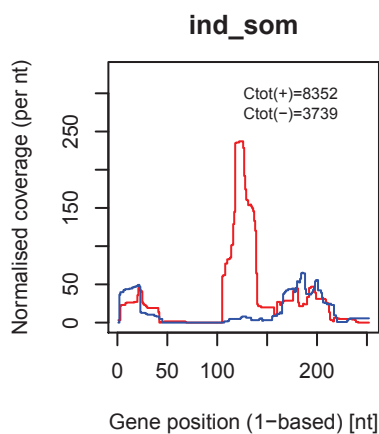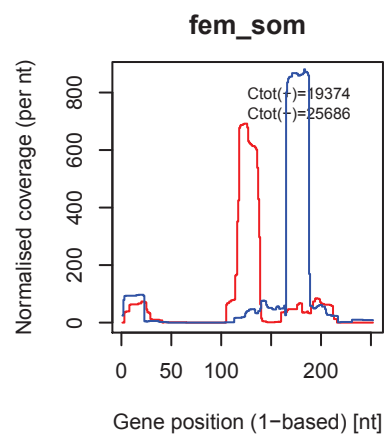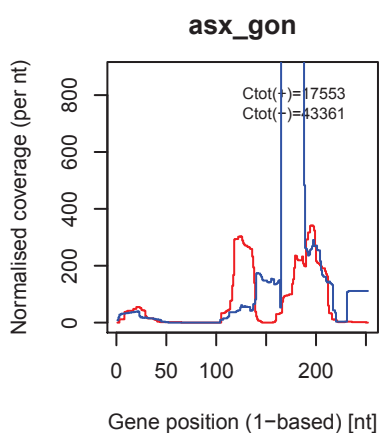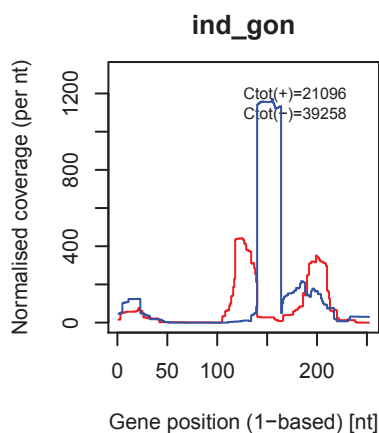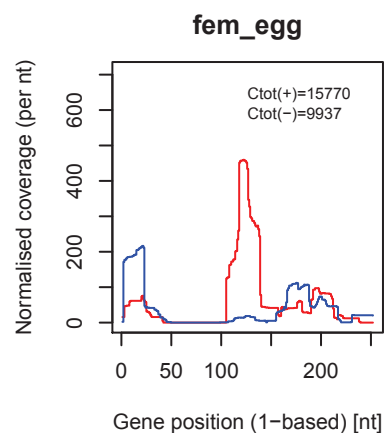

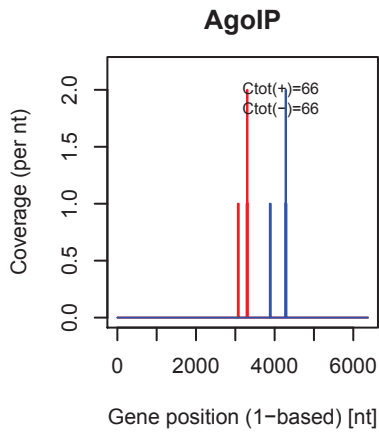

## Gypsy13-I\_VC

Red=plus strand  
Blue=minus strand

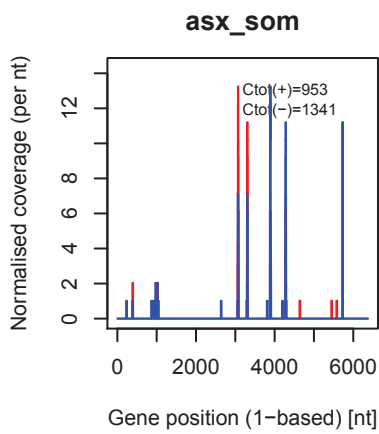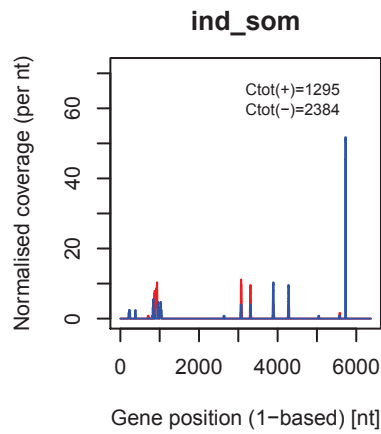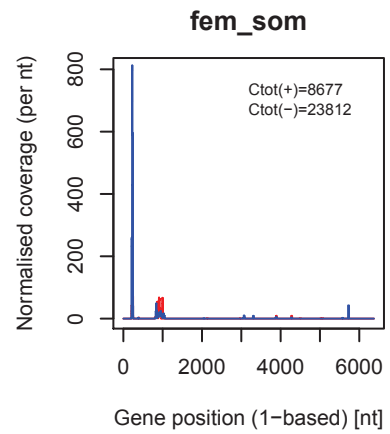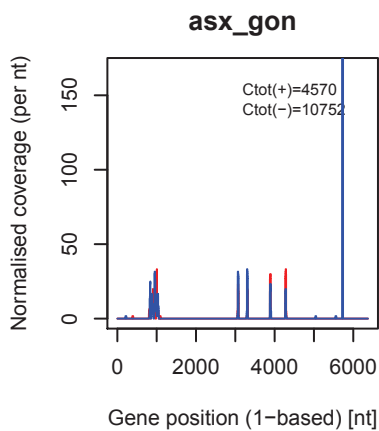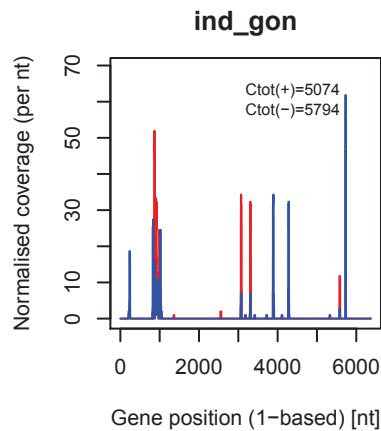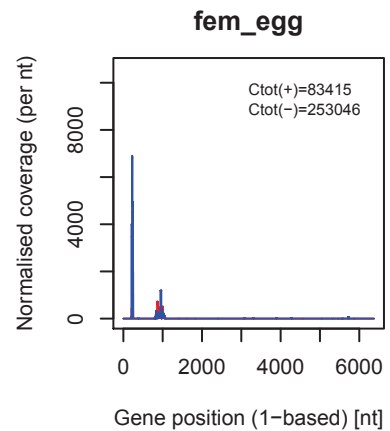

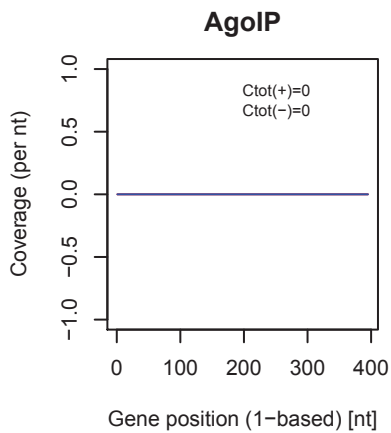

**Gypsy13-LTR\_VC**

Red=plus strand  
Blue=minus strand

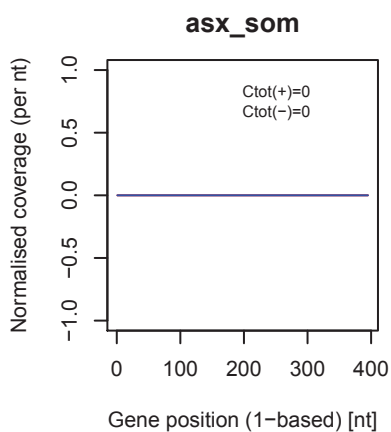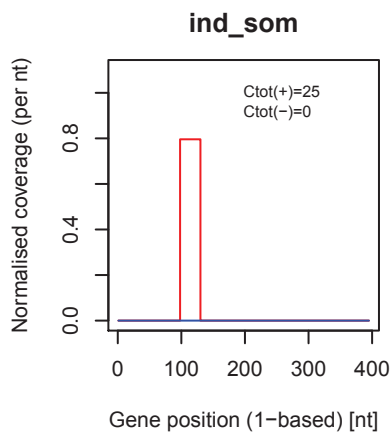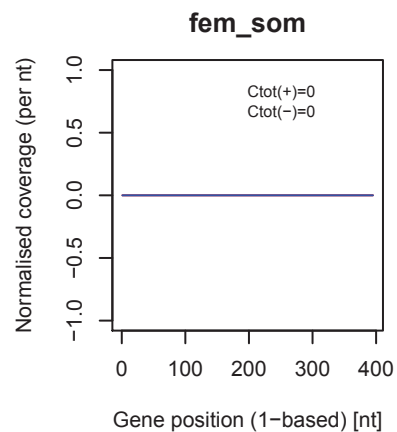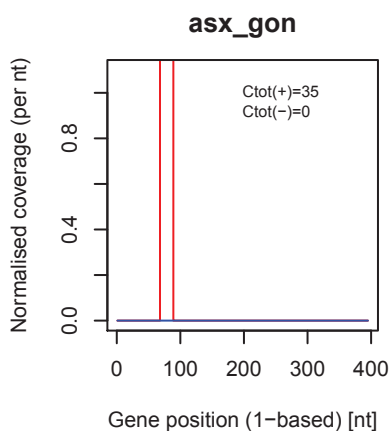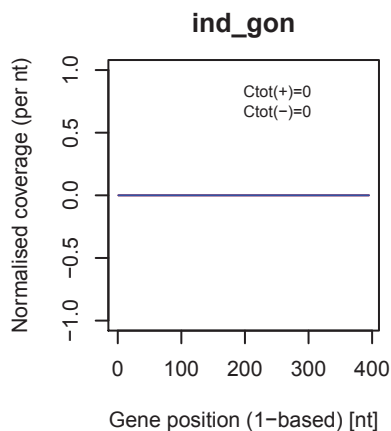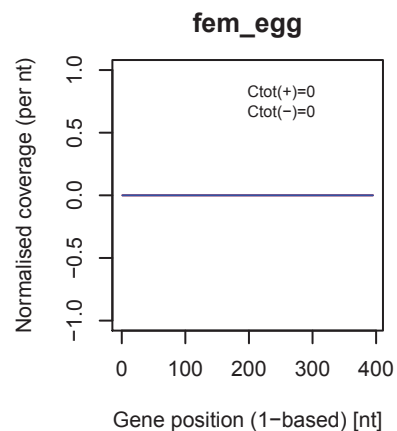



# Gypsy14-I\_VC

Red=plus strand  
Blue=minus strand

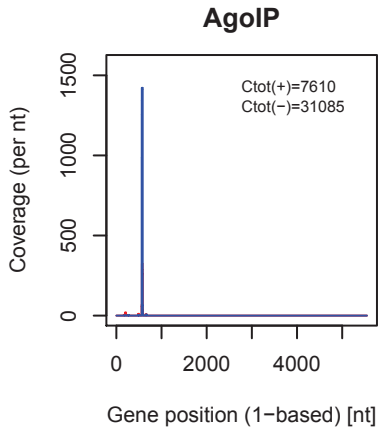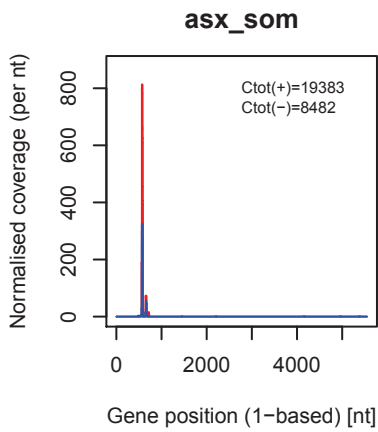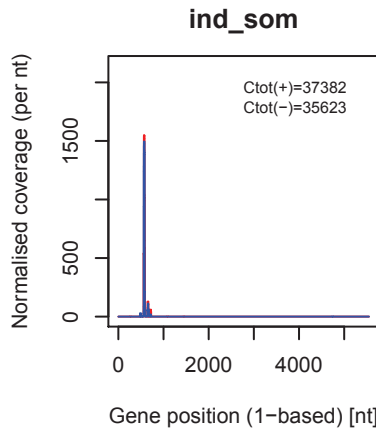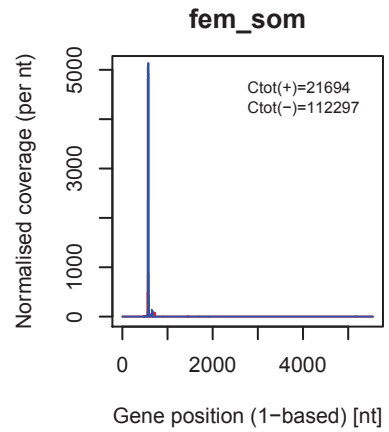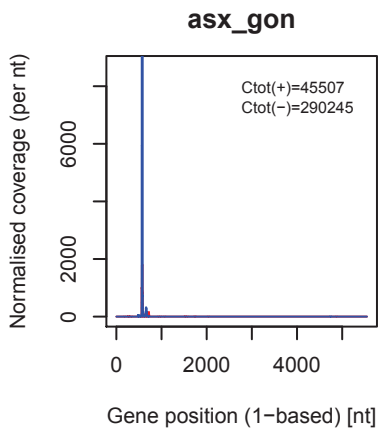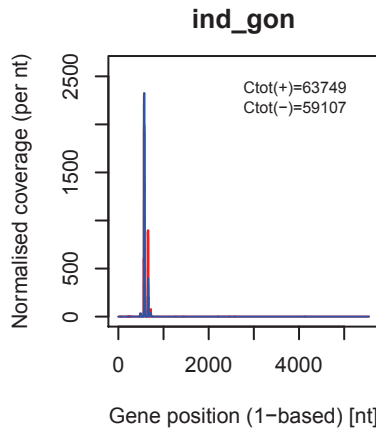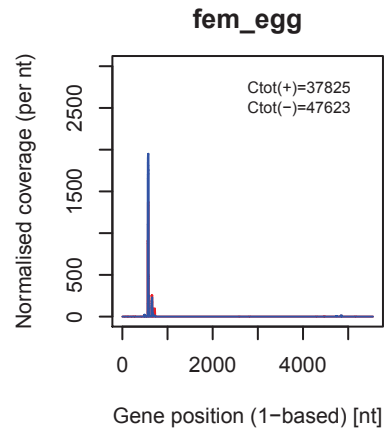

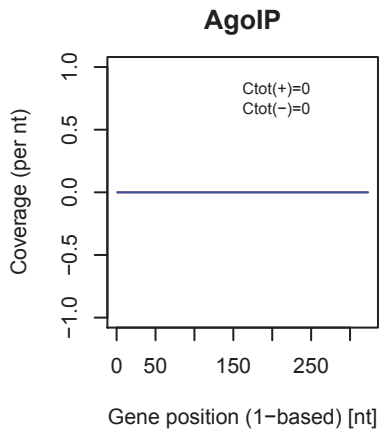

**Gypsy14-LTR\_VC**

Red=plus strand  
Blue=minus strand

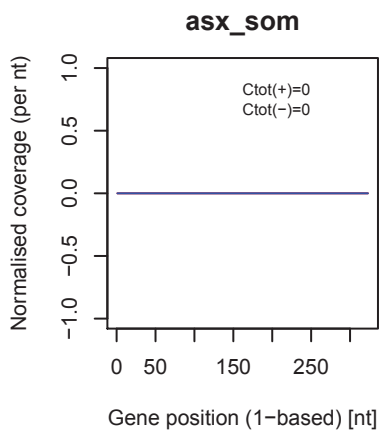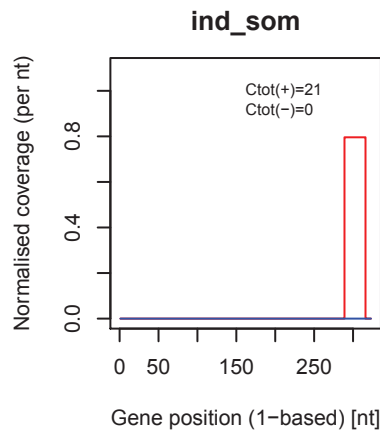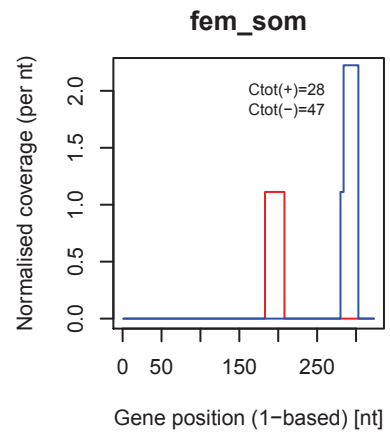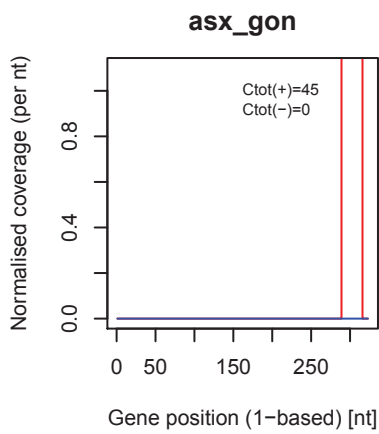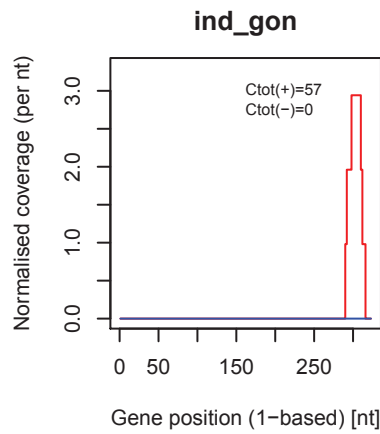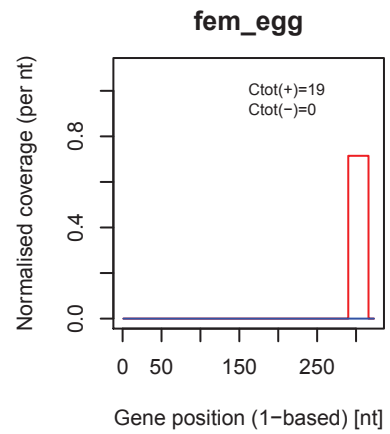

## Gypsy15-I\_VC

Red=plus strand  
Blue=minus strand

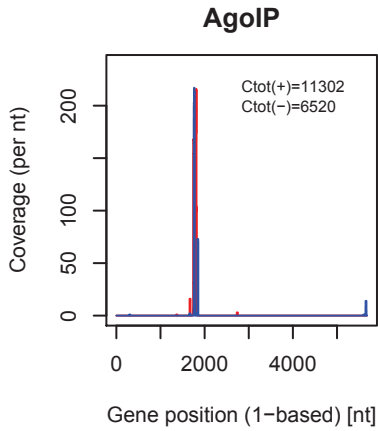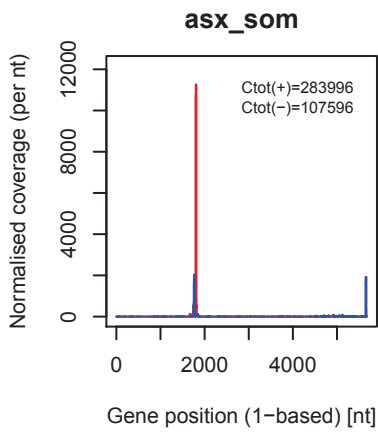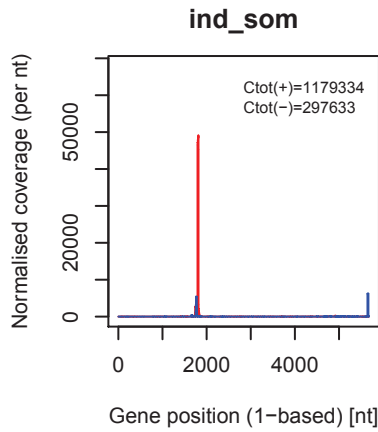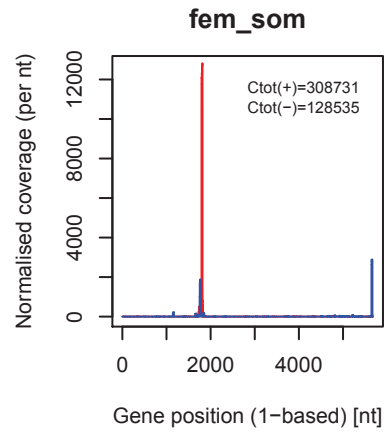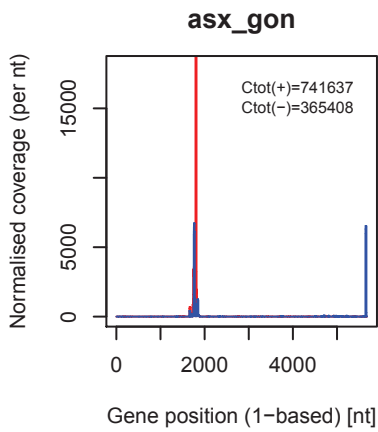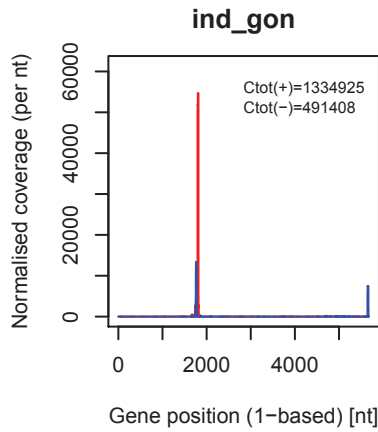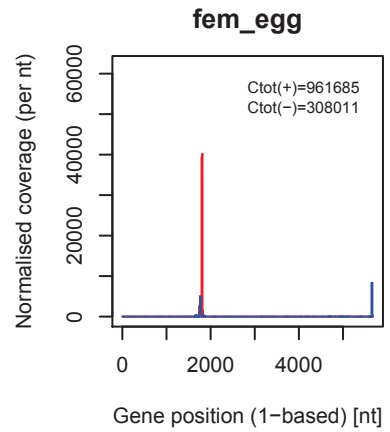

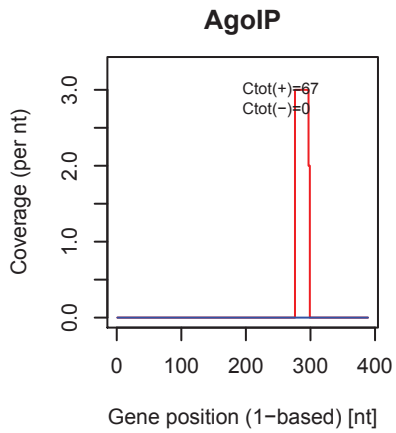

**Gypsy15-LTR\_VC**

Red=plus strand  
Blue=minus strand

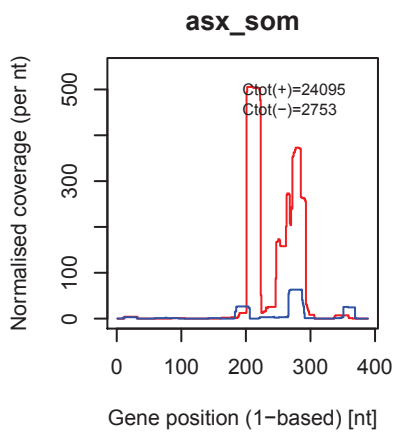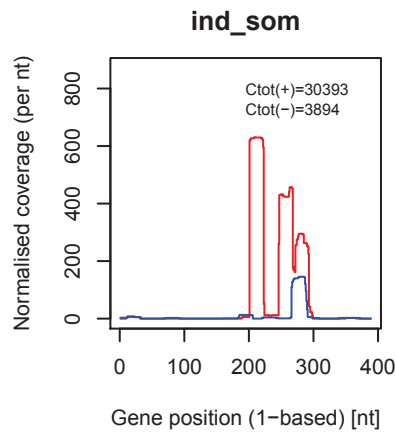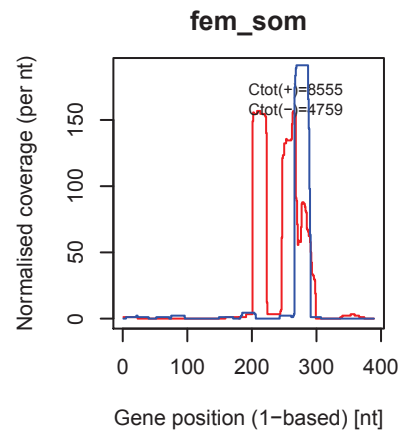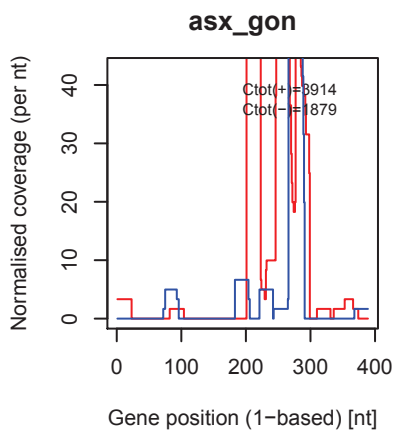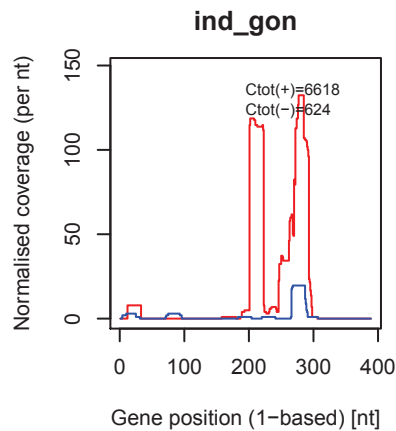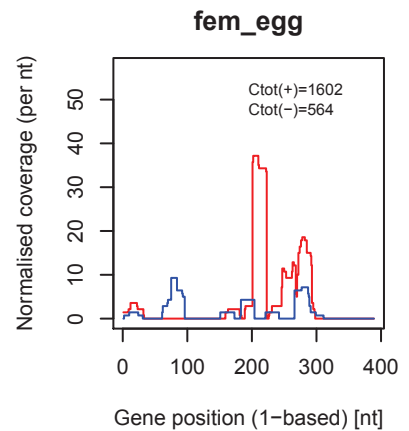

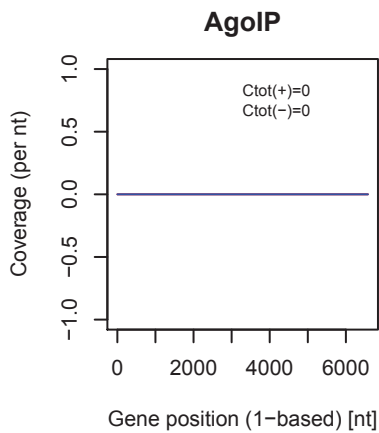

## Gypsy16-I\_VC

Red=plus strand  
Blue=minus strand

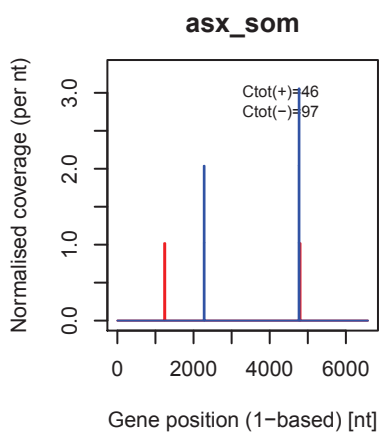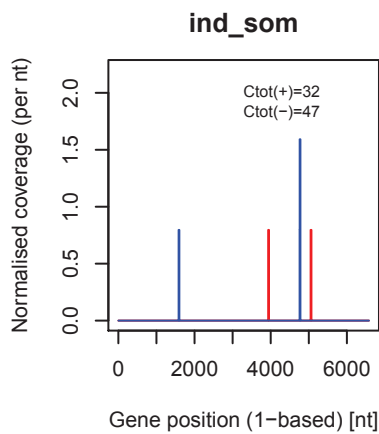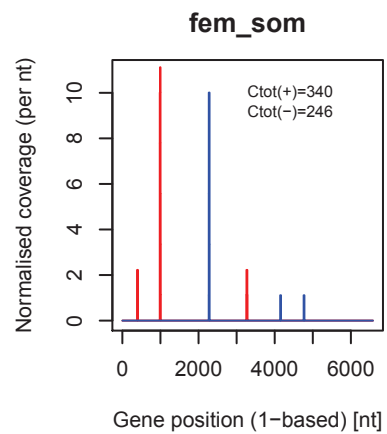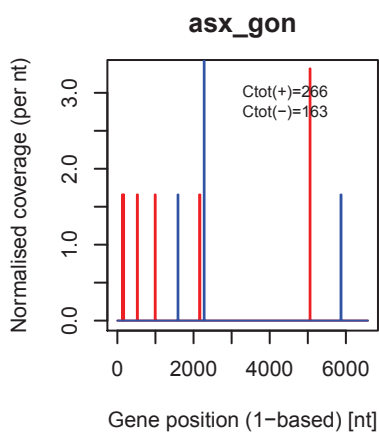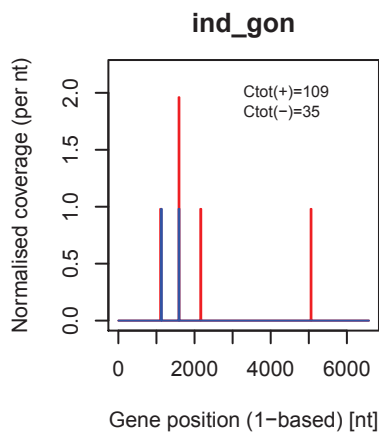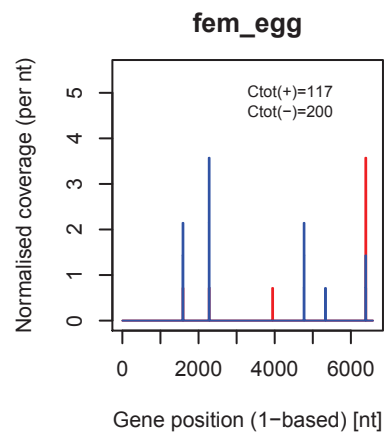

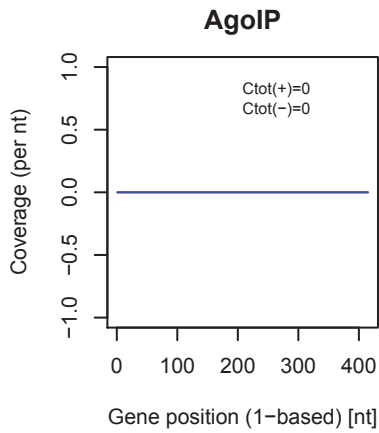

**Gypsy16-LTR\_VC**

Red=plus strand  
Blue=minus strand

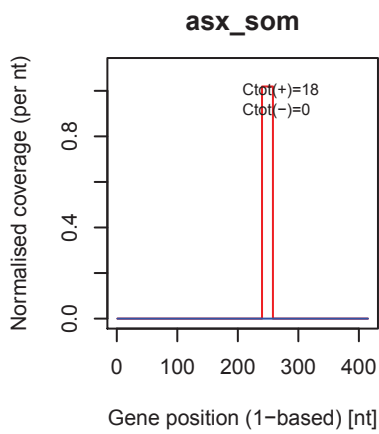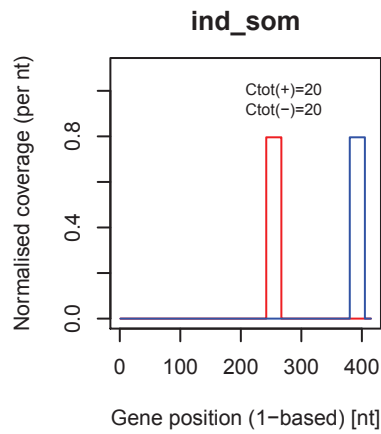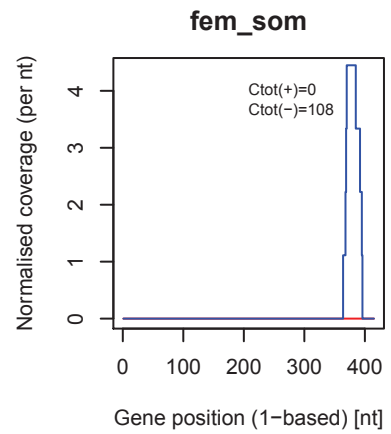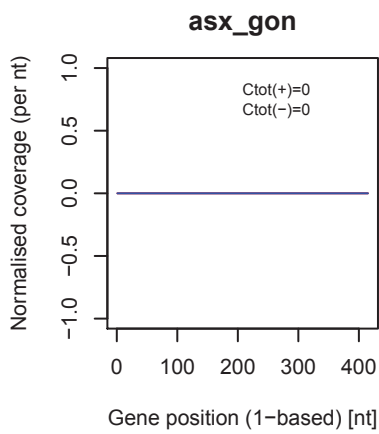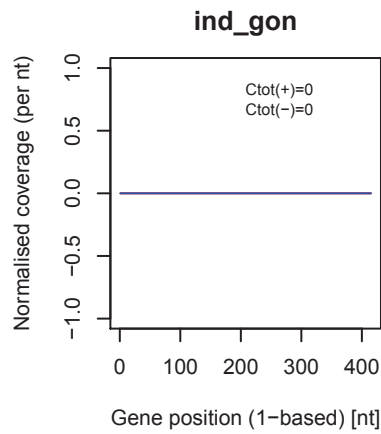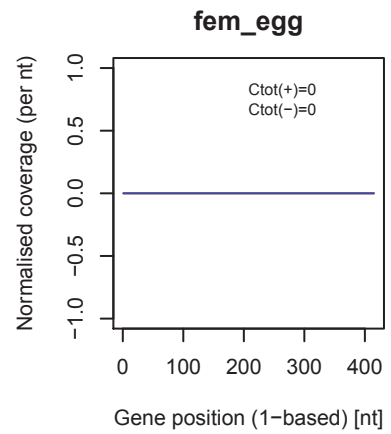

## Gypsy2-I\_VC

Red=plus strand  
Blue=minus strand

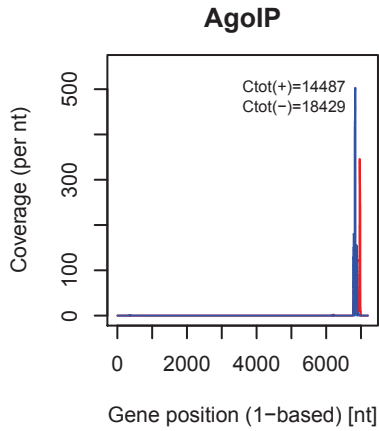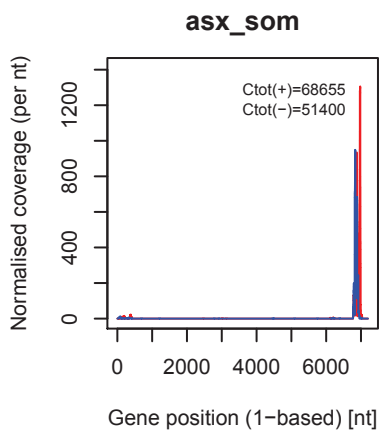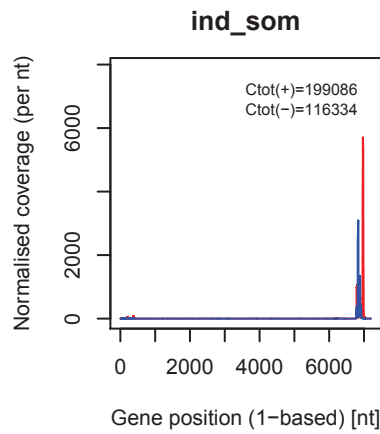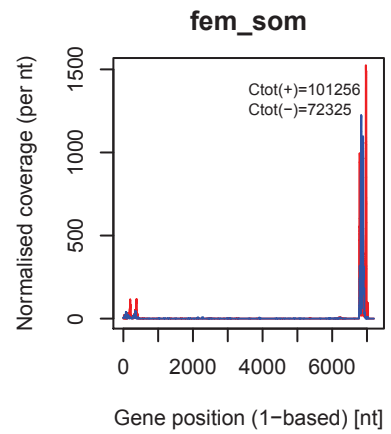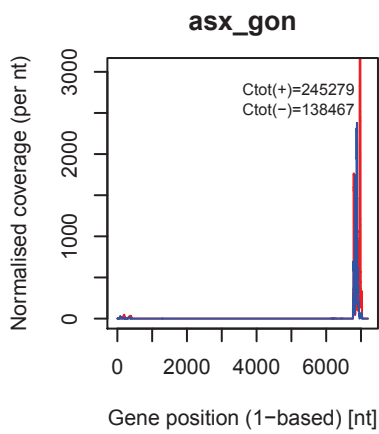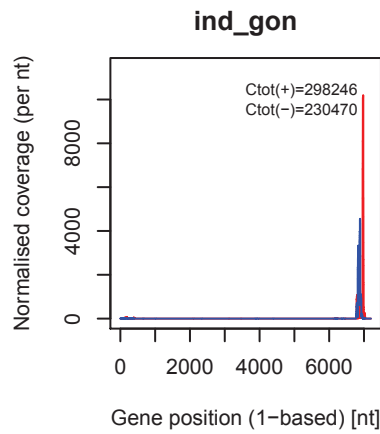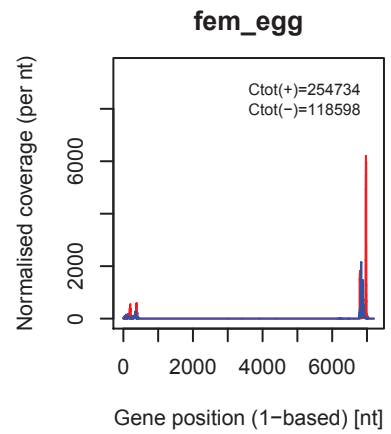

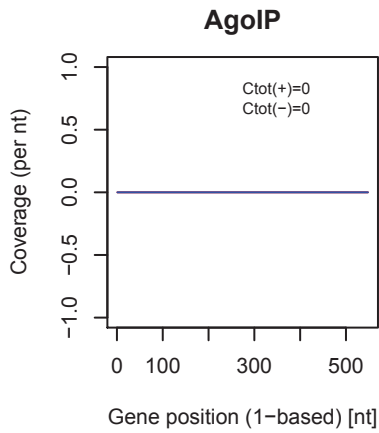

## Gypsy2-LTR\_VC

Red=plus strand  
Blue=minus strand

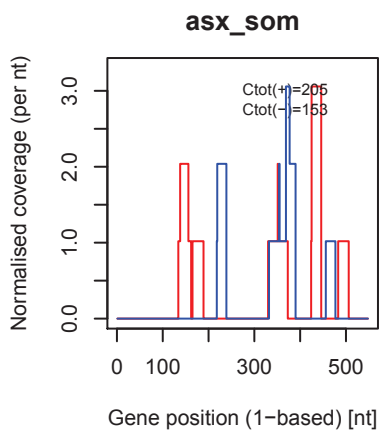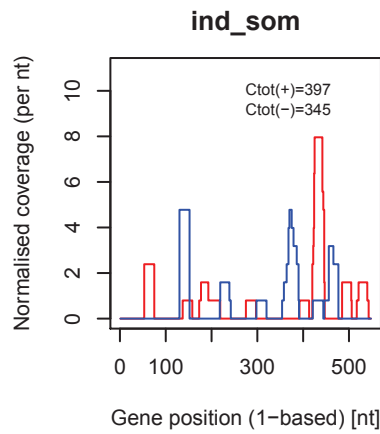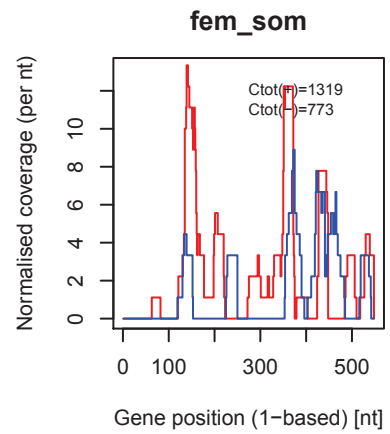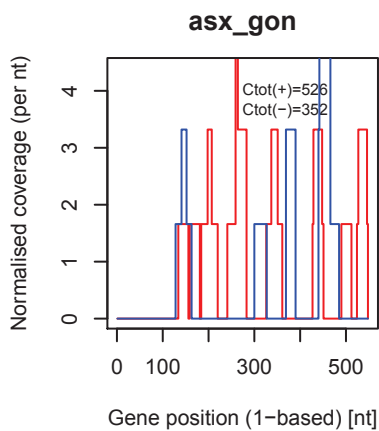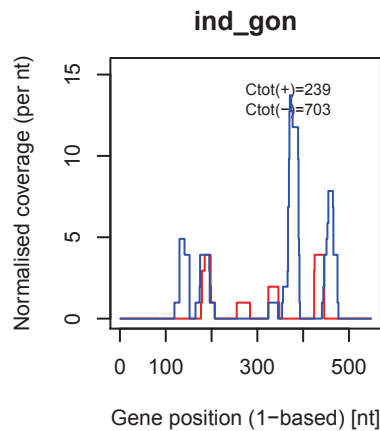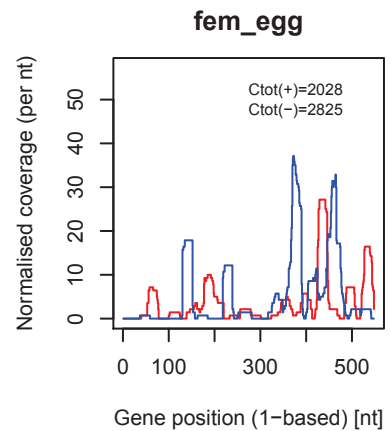



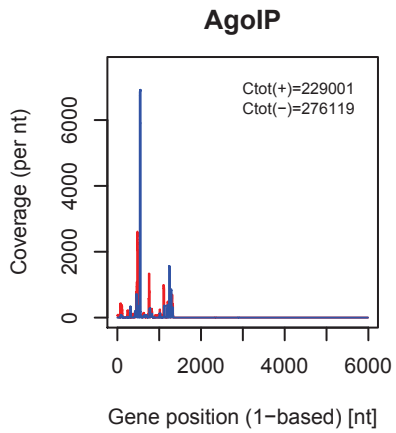

**Gypsy3-I\_VC**

Red=plus strand  
Blue=minus strand

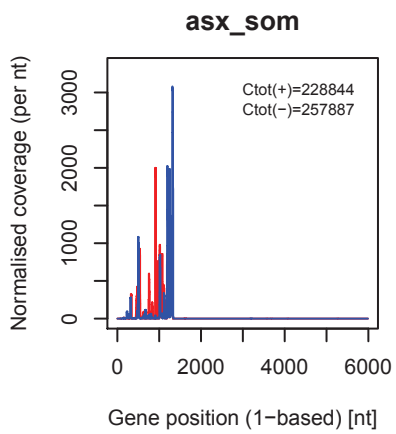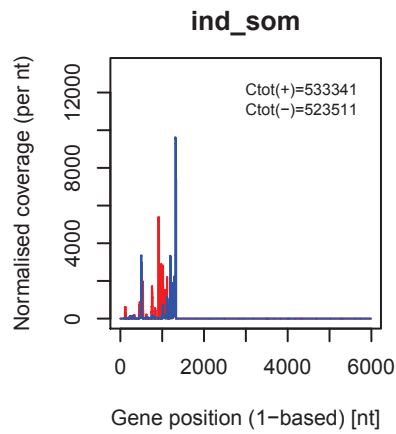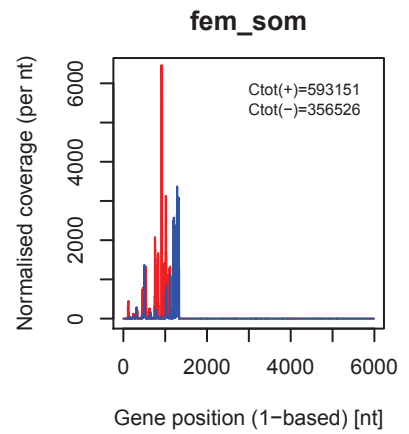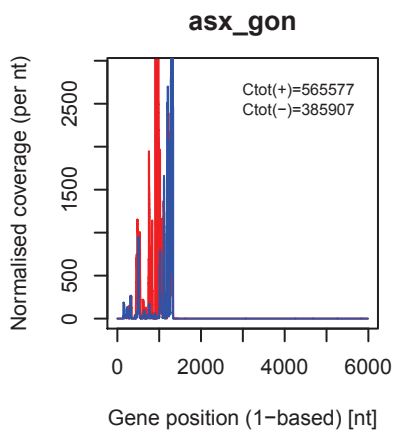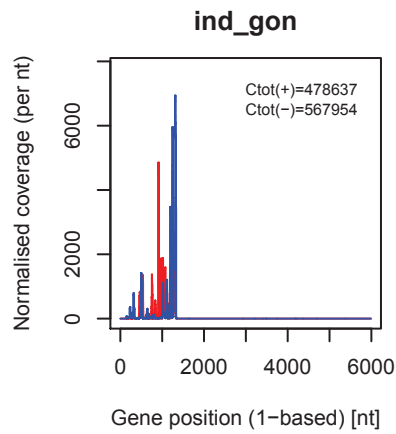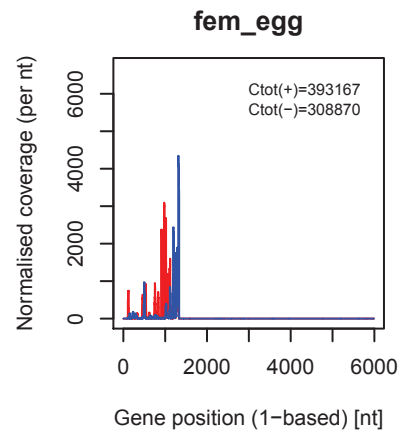

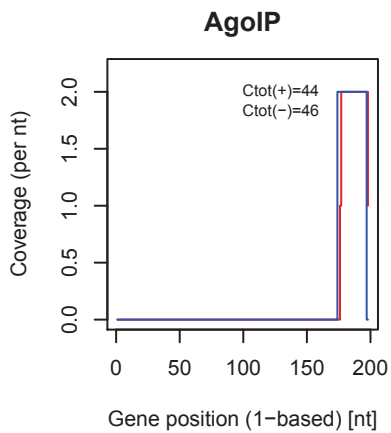

**Gypsy3-LTR\_VC**

Red=plus strand  
Blue=minus strand

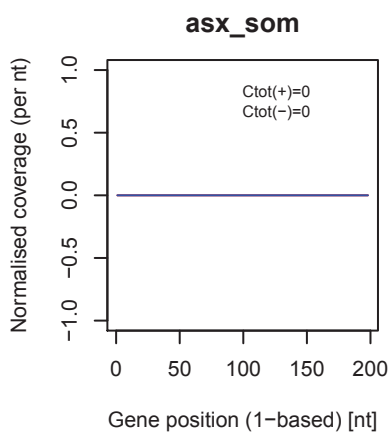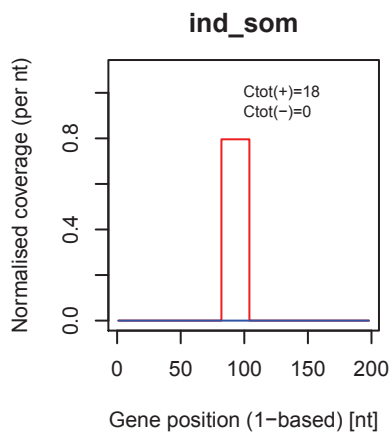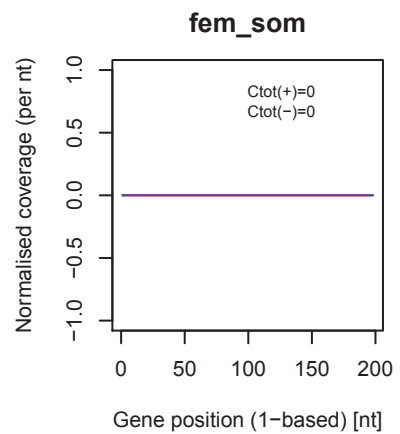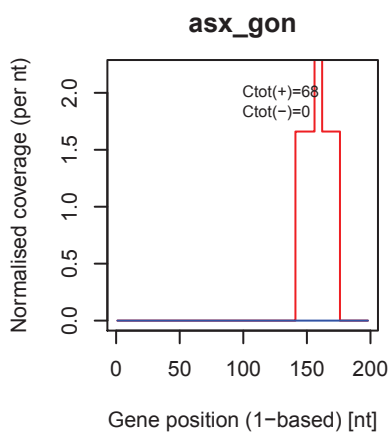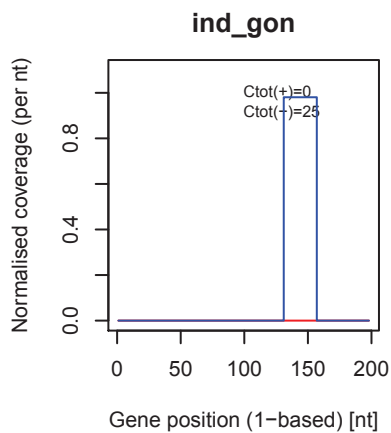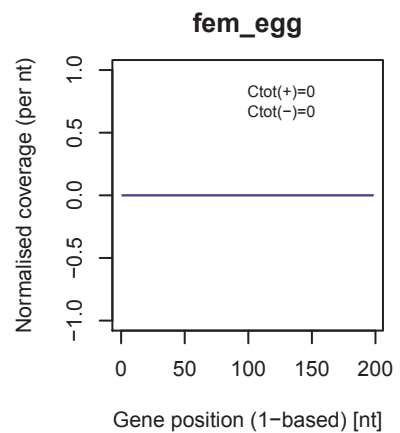

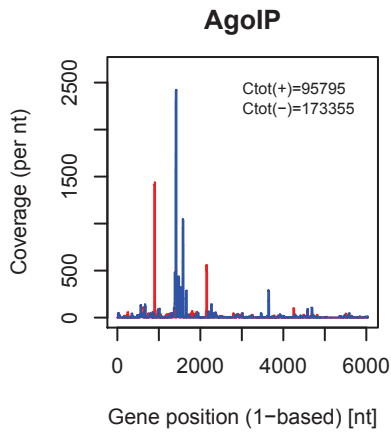

**Gypsy4-I\_VC**

Red=plus strand  
Blue=minus strand

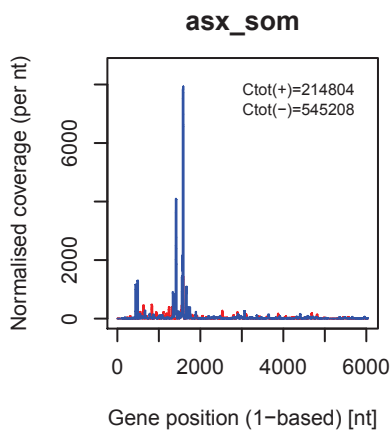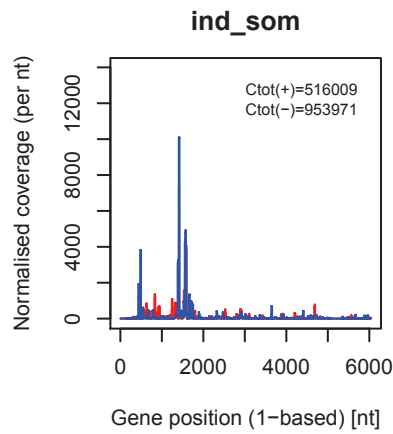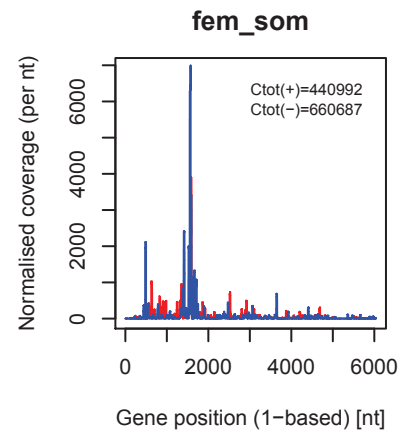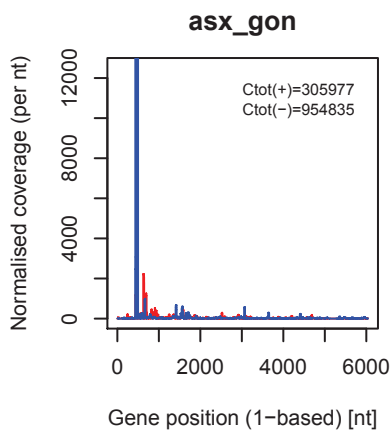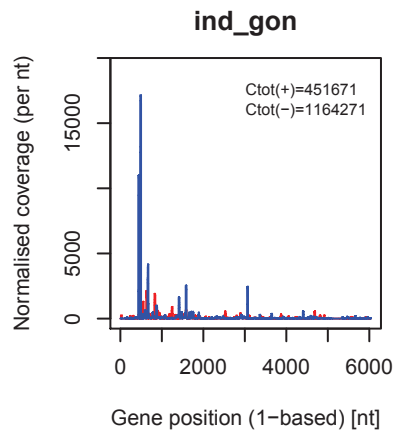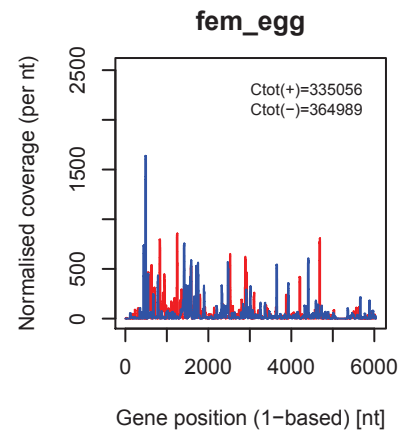

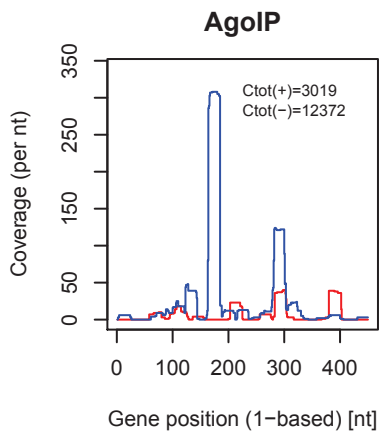

Gypsy4-LTR\_VC

Red=plus strand  
Blue=minus strand

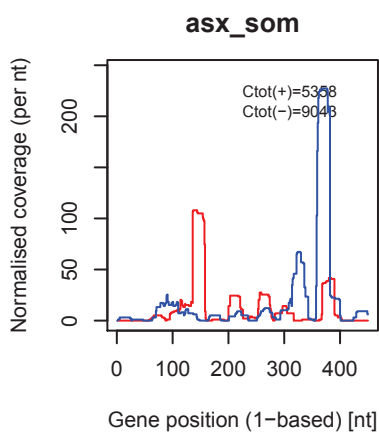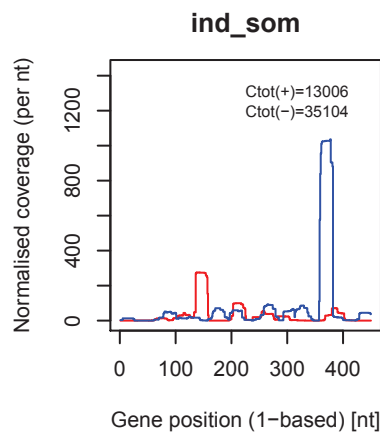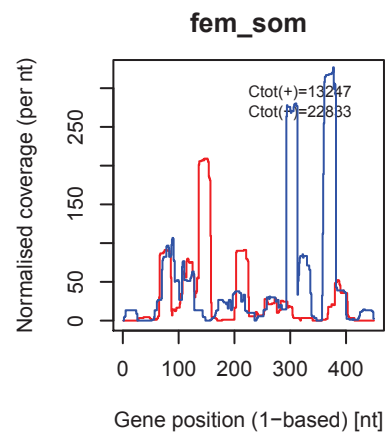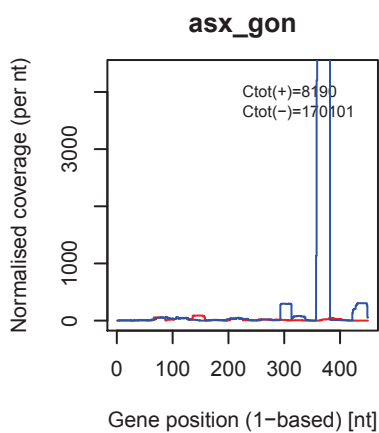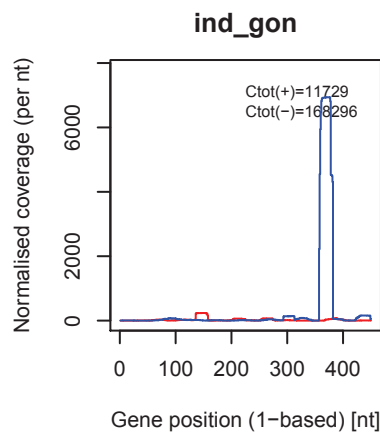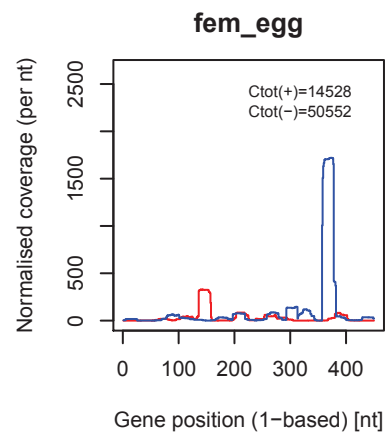

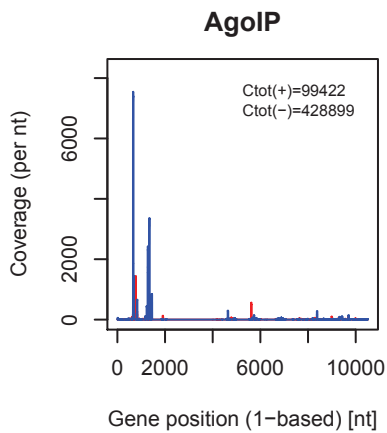

**Gypsy5-I\_VC**

Red=plus strand  
Blue=minus strand

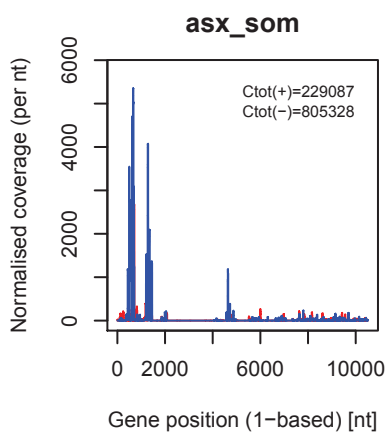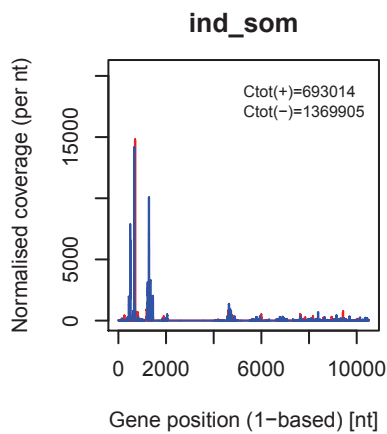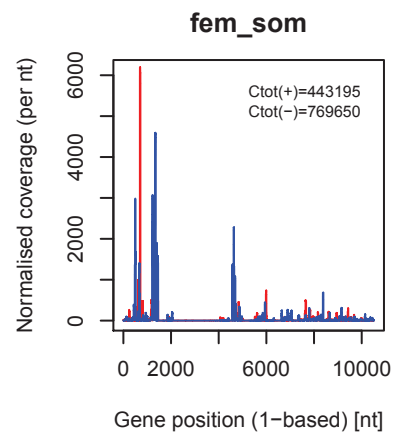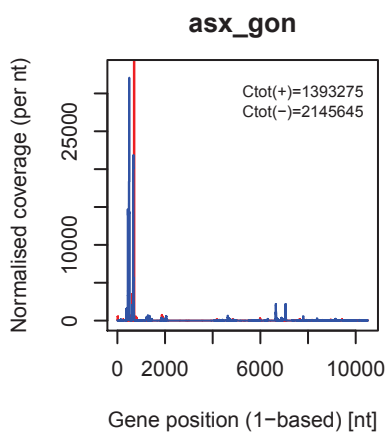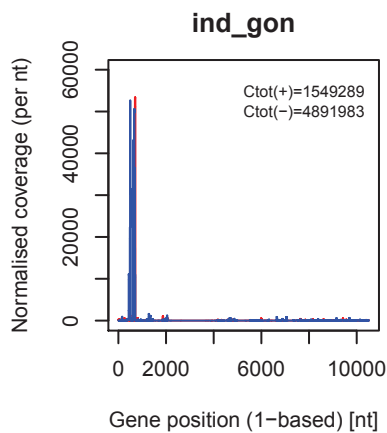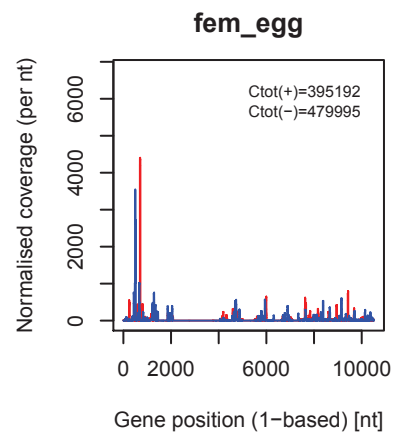

# Gypsy5-LTR\_VC

Red=plus strand  
Blue=minus strand

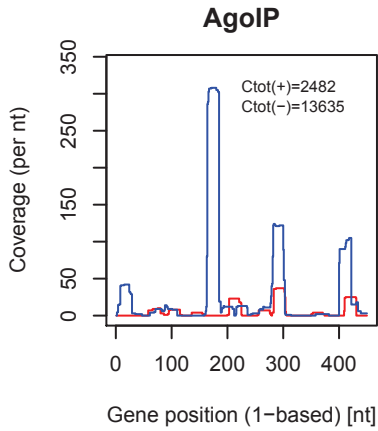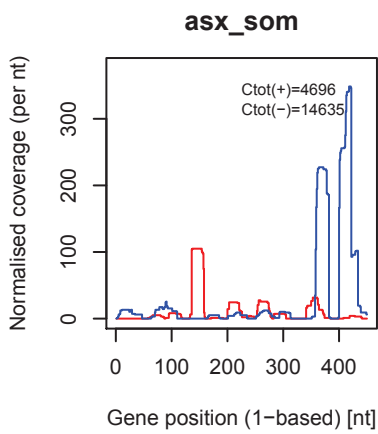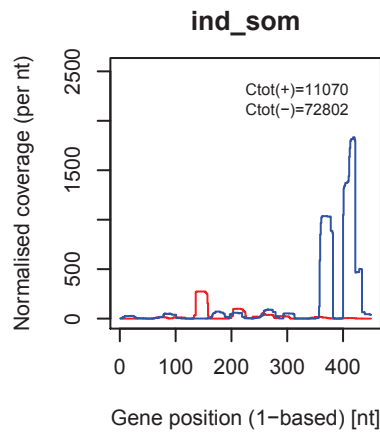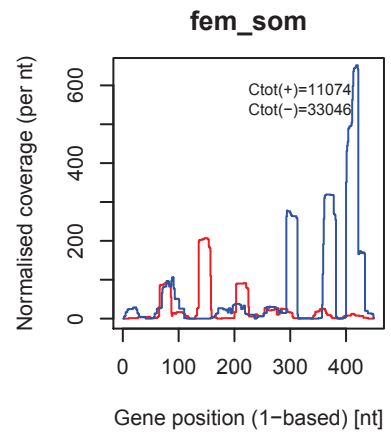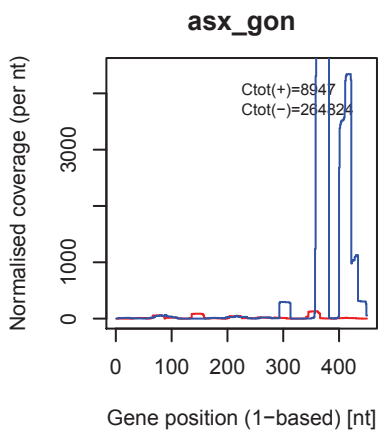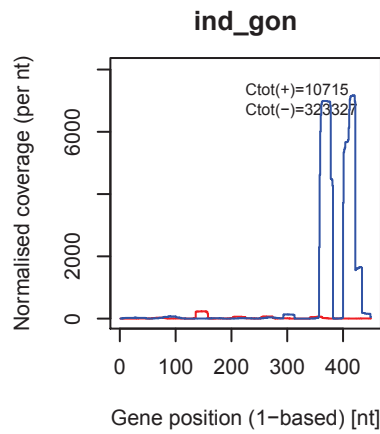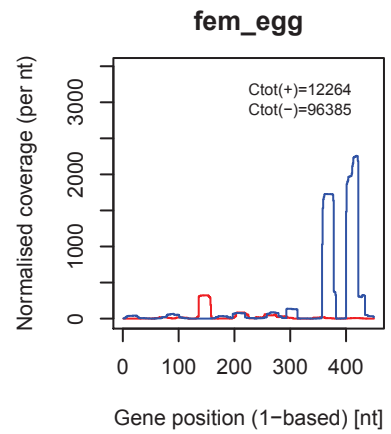

## Gypsy6-I\_VC

Red=plus strand  
Blue=minus strand

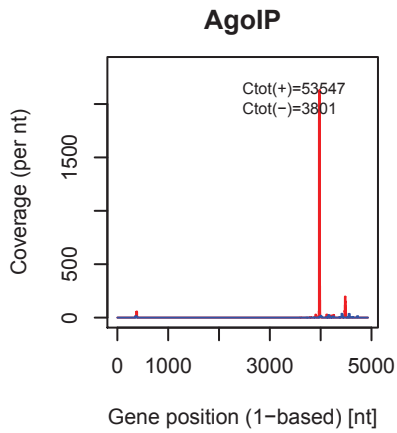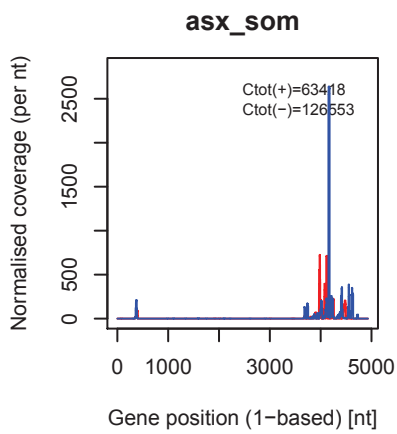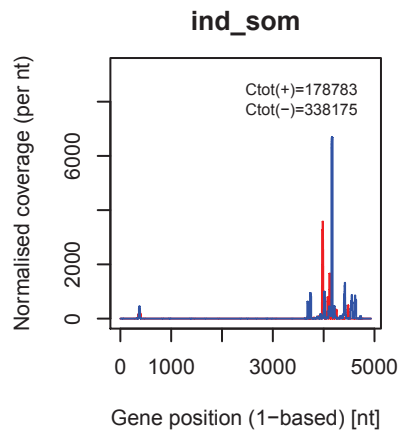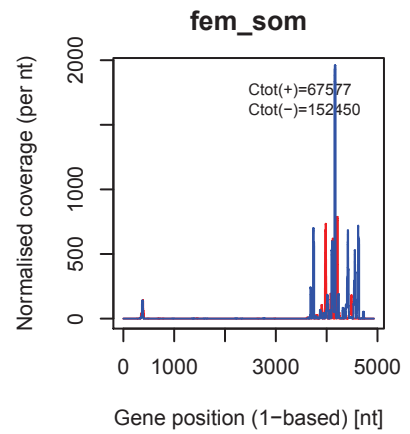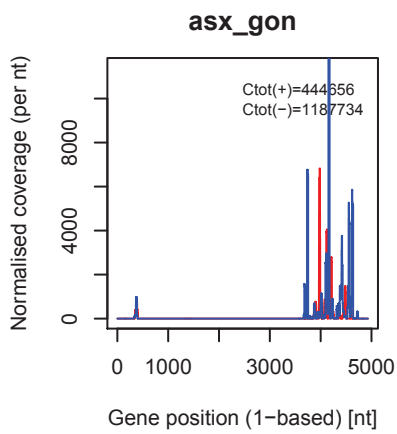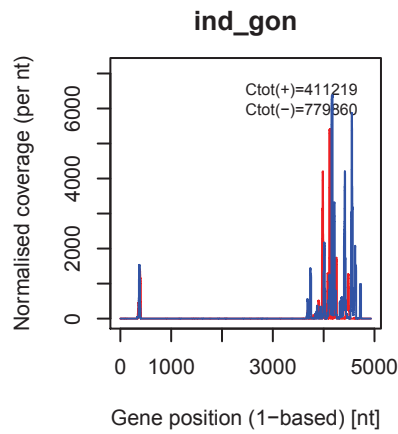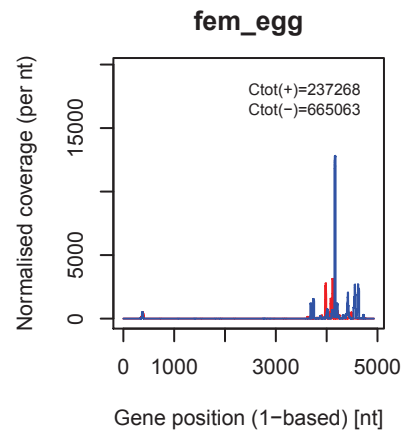

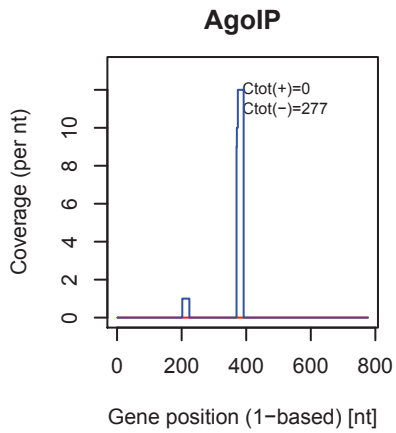

### Gypsy6-LTR\_VC

Red=plus strand  
Blue=minus strand

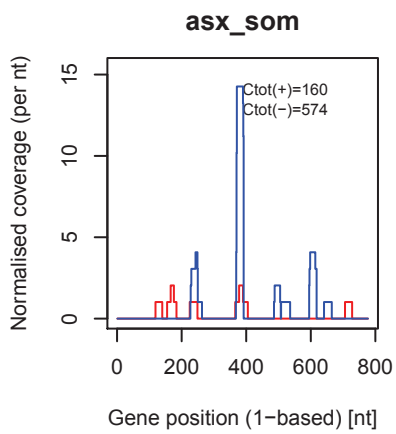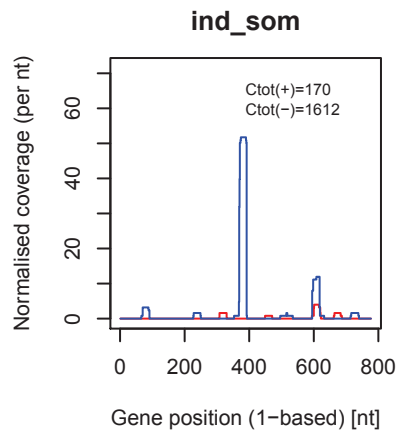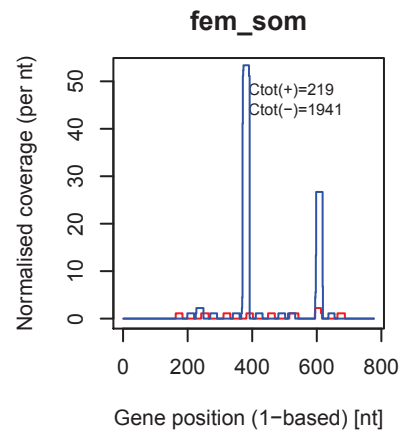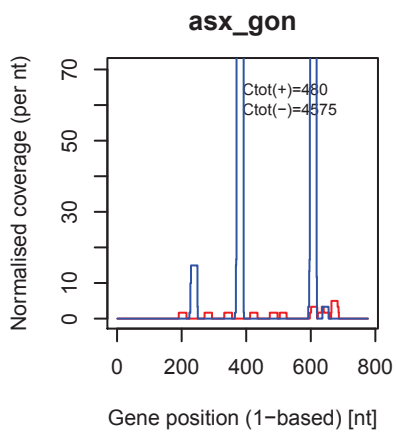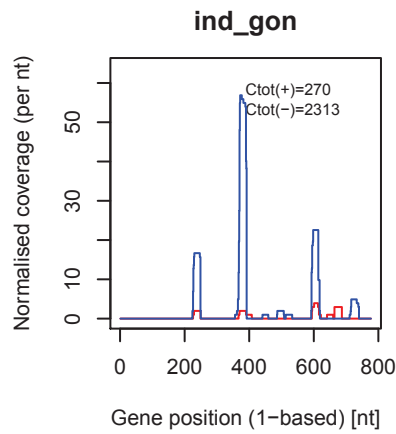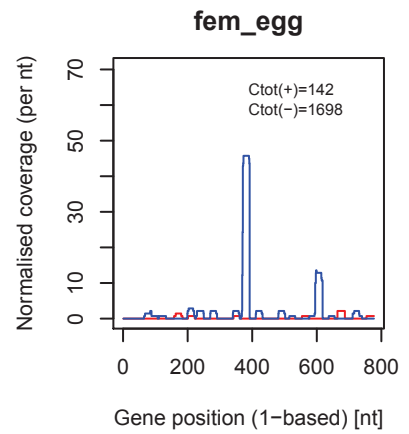



## Gypsy7-I\_VC

Red=plus strand  
Blue=minus strand

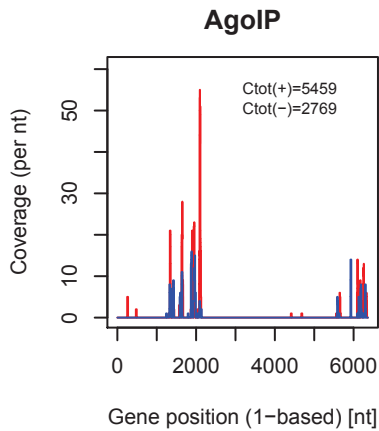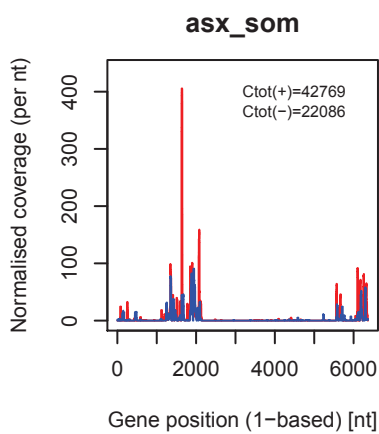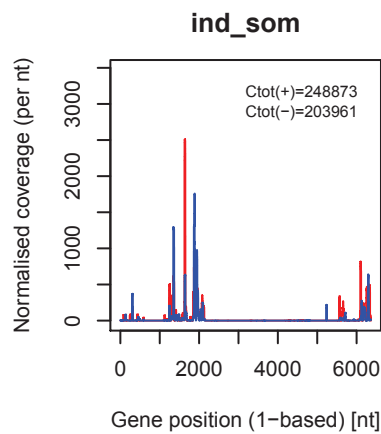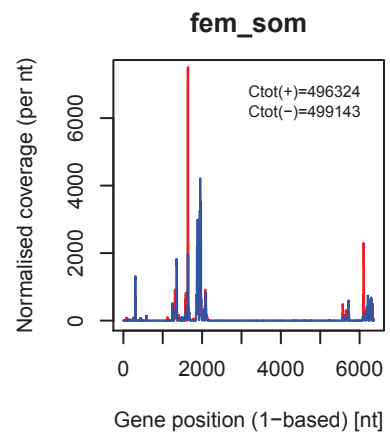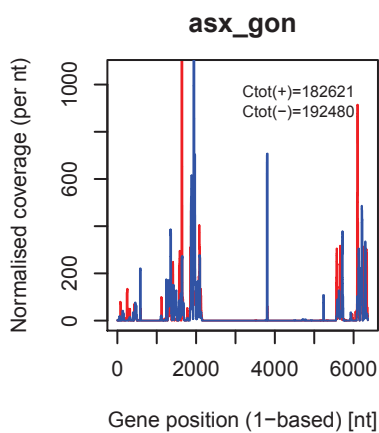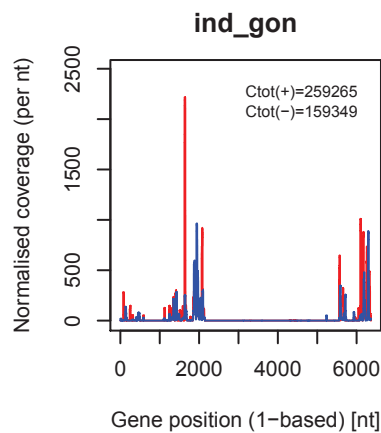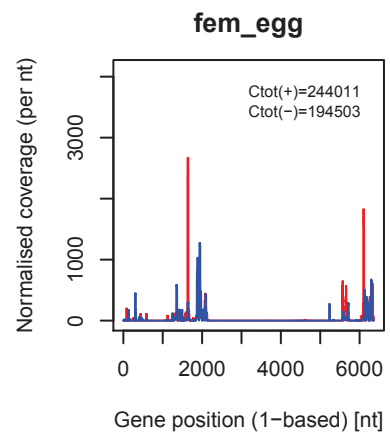

# Gypsy7-LTR\_VC

Red=plus strand  
Blue=minus strand

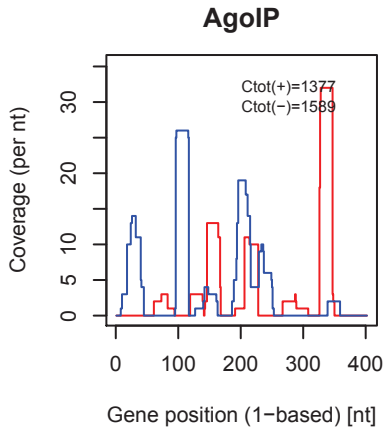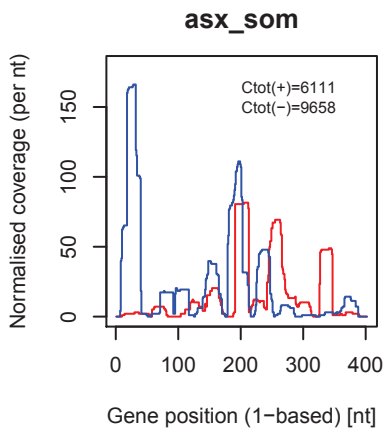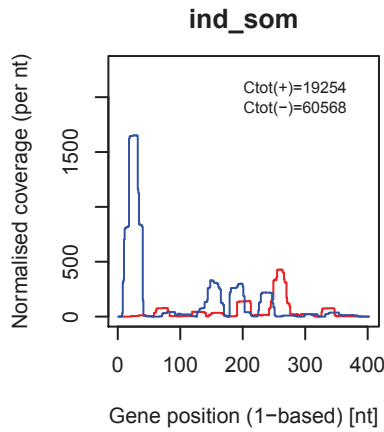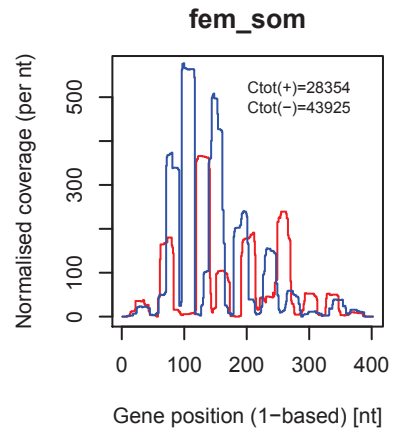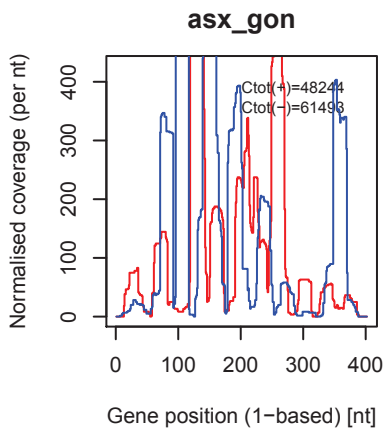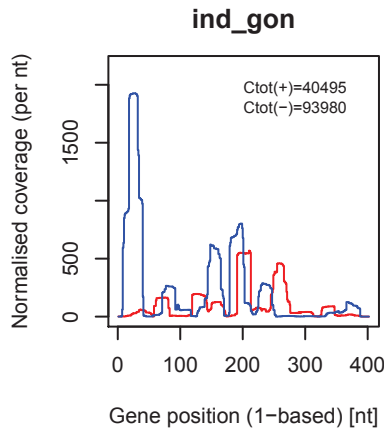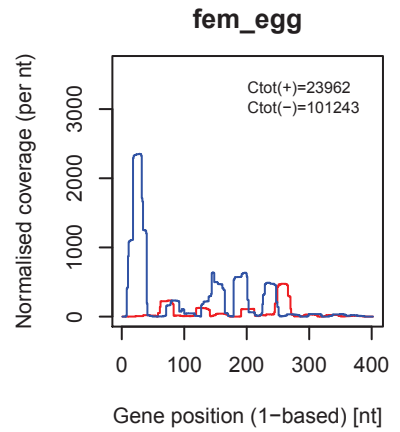

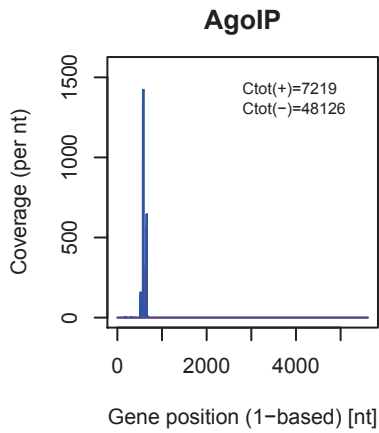

**Gypsy8-I\_VC**

Red=plus strand  
Blue=minus strand

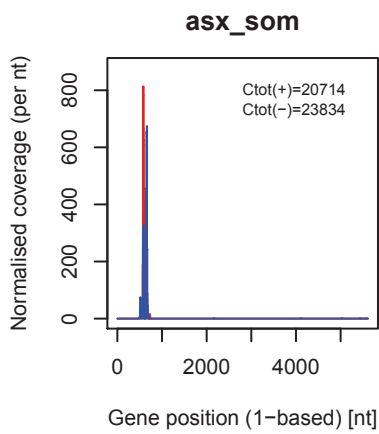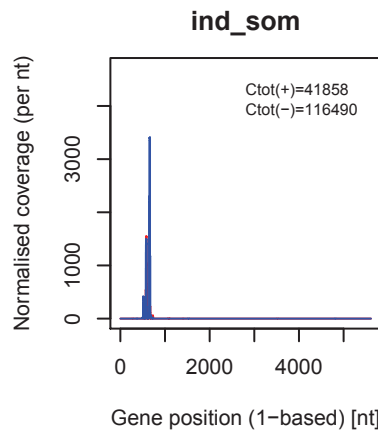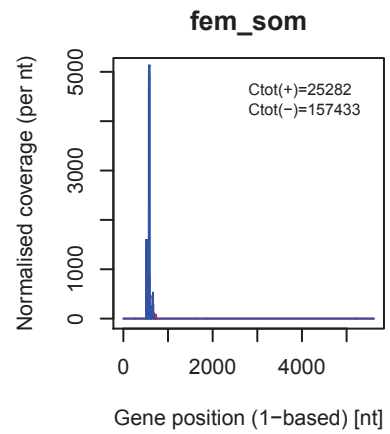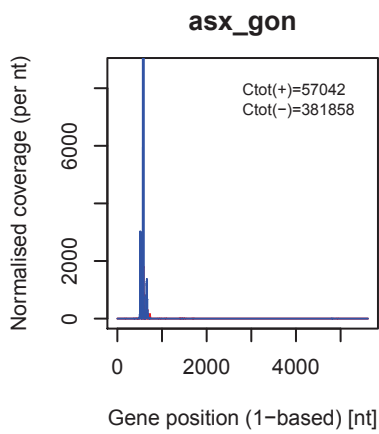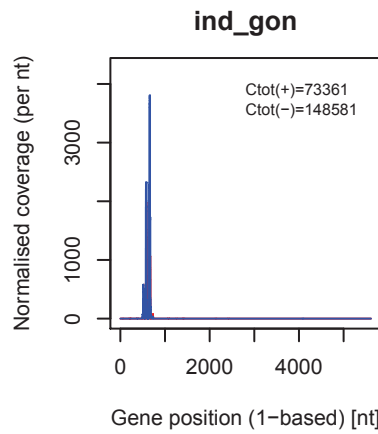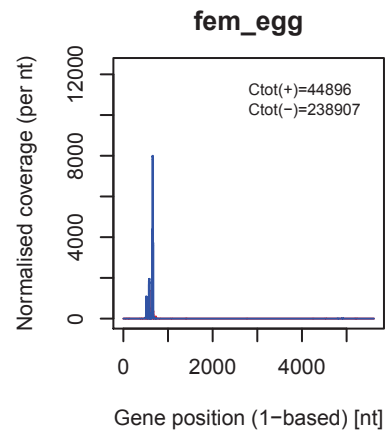



## Gypsy8-LTR\_VC

Red=plus strand  
Blue=minus strand

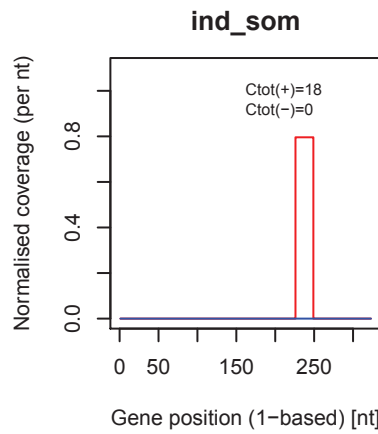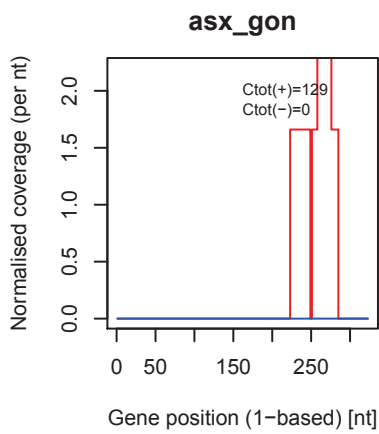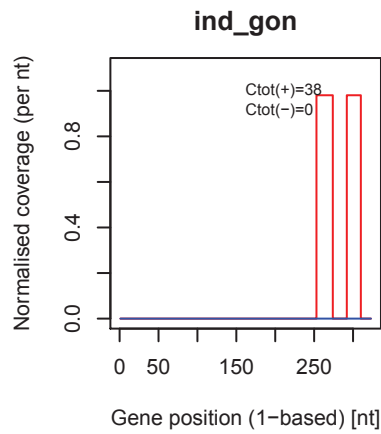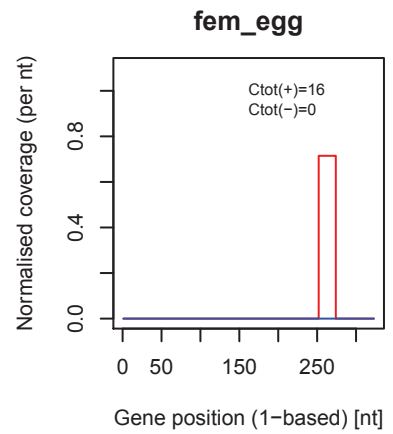

# Gypsy9-I\_VC

Red=plus strand  
Blue=minus strand

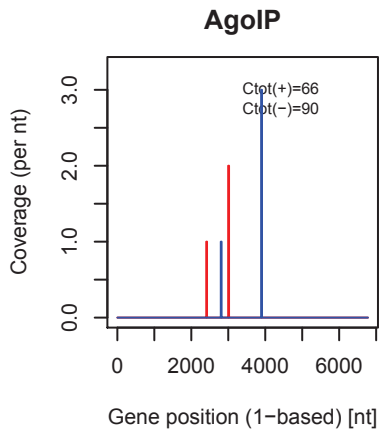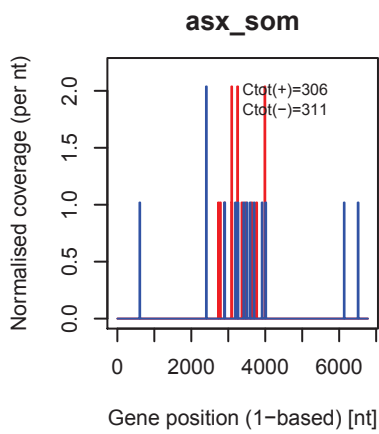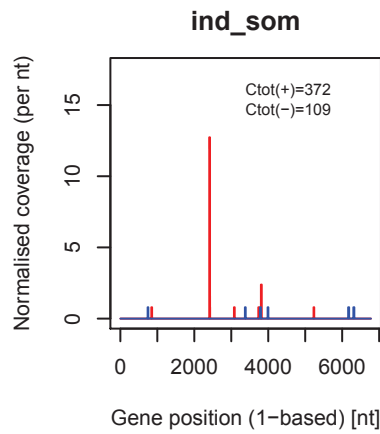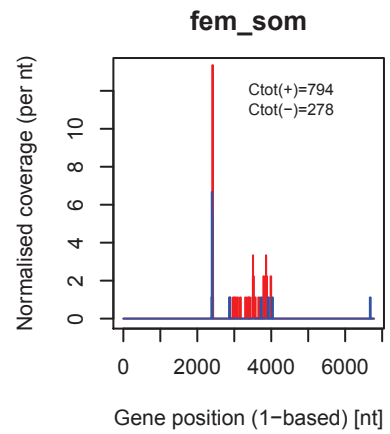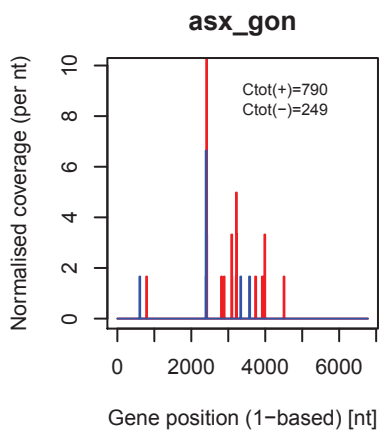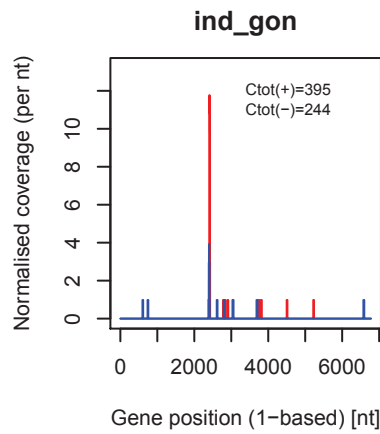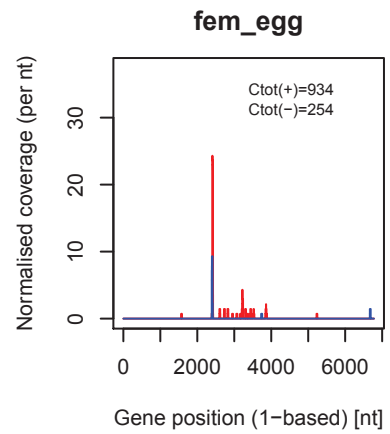



**Gypsy9-LTR\_VC**

Red=plus strand  
Blue=minus strand

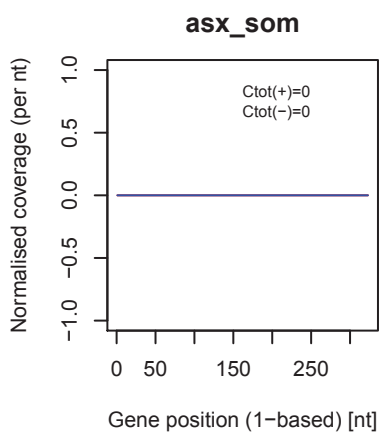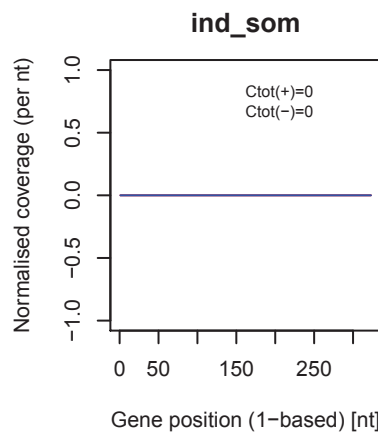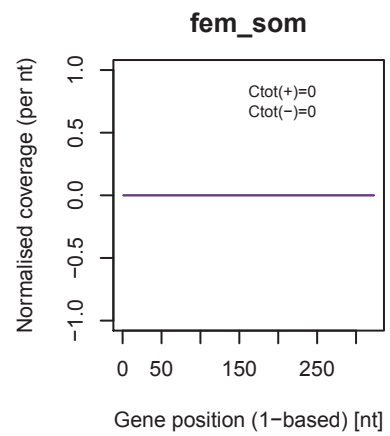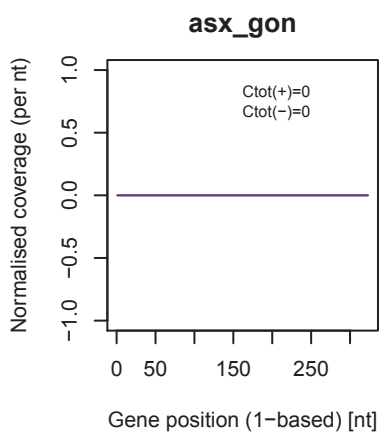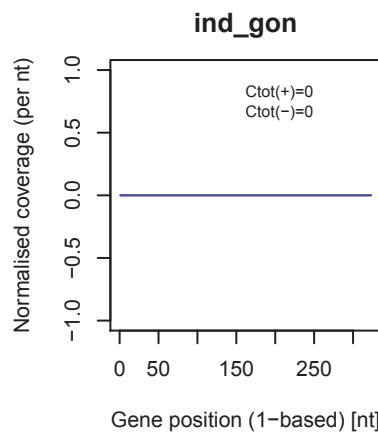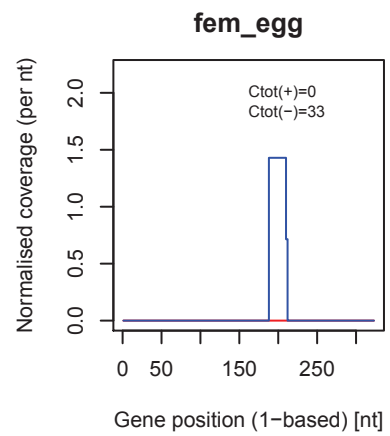

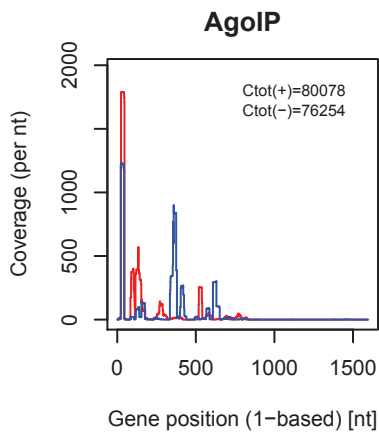

JORDAN

Red=plus strand  
Blue=minus strand

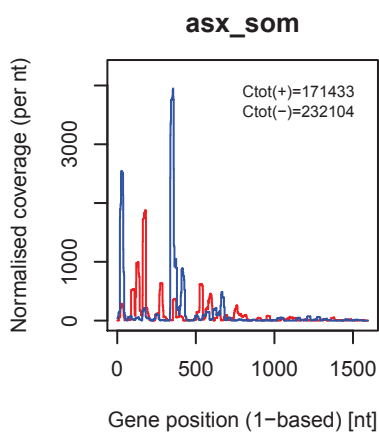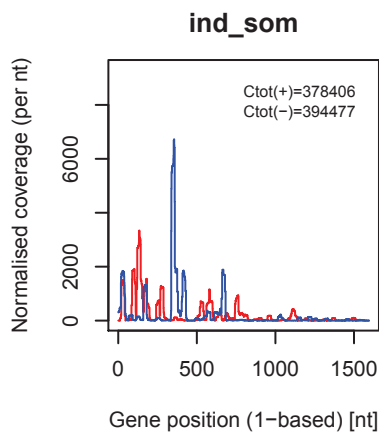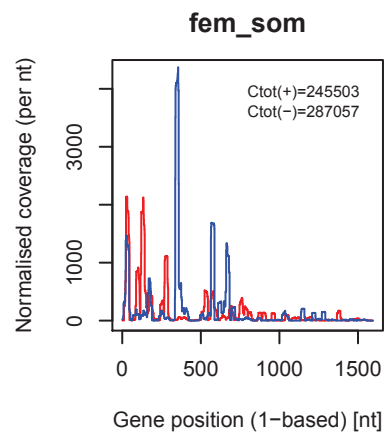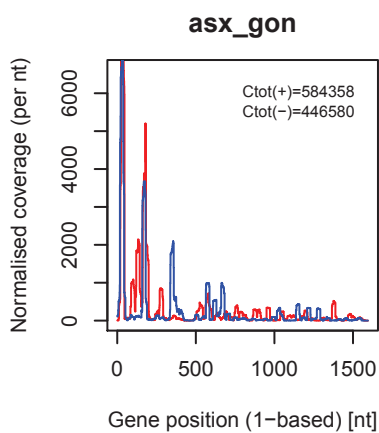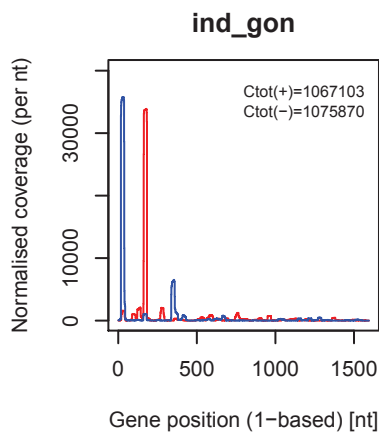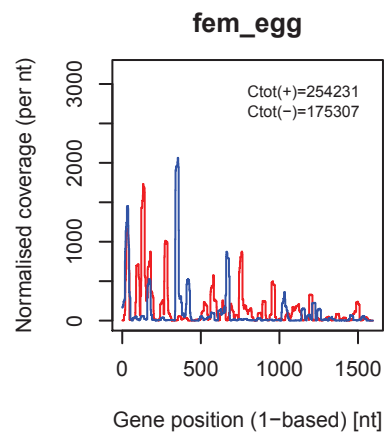

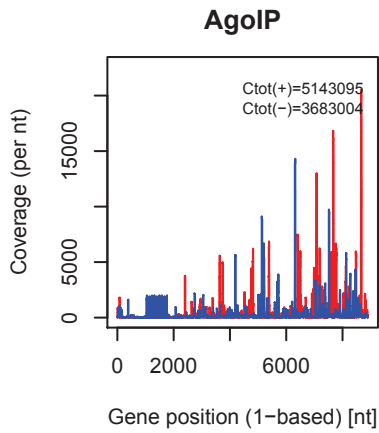

**KANGAROO-1\_VC**

Red=plus strand  
Blue=minus strand

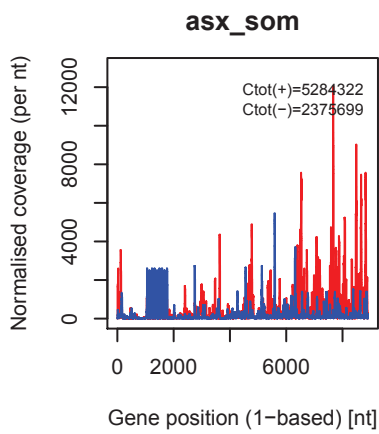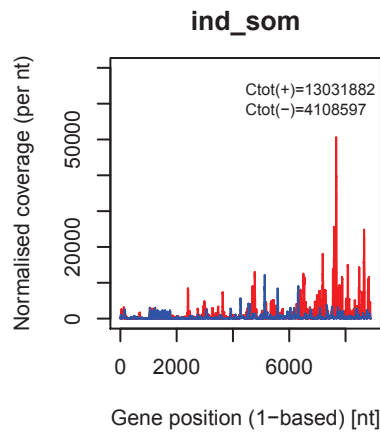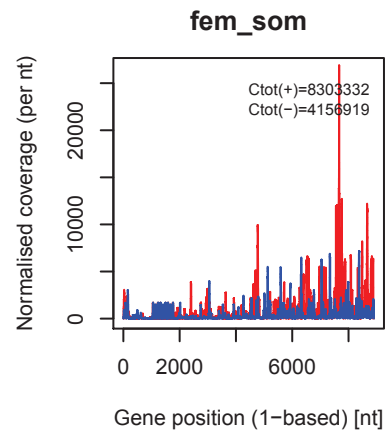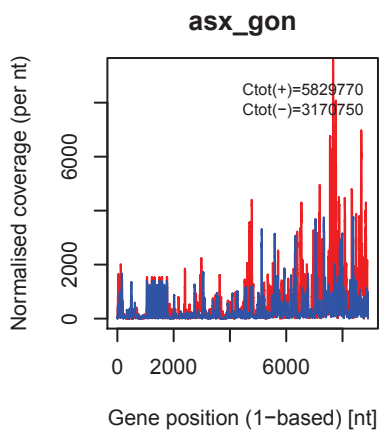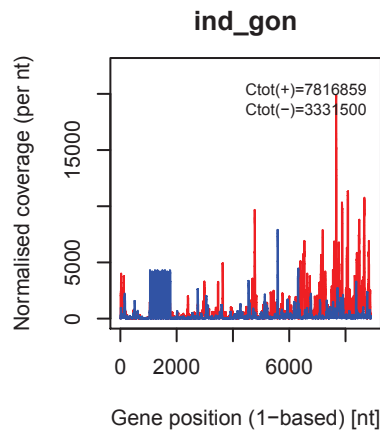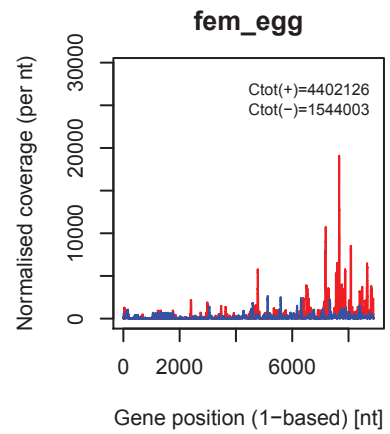



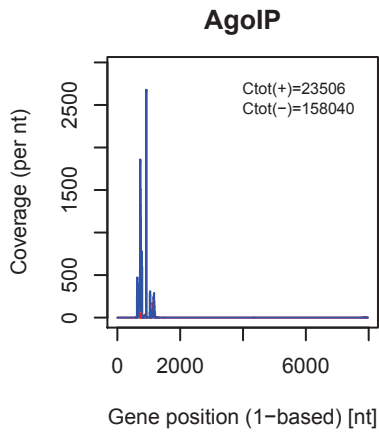

L1-1\_VC

Red=plus strand  
Blue=minus strand

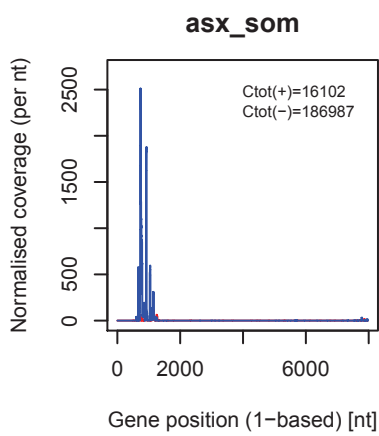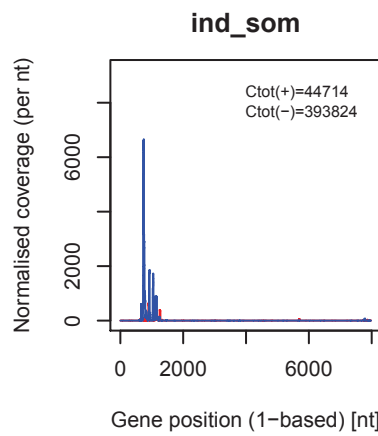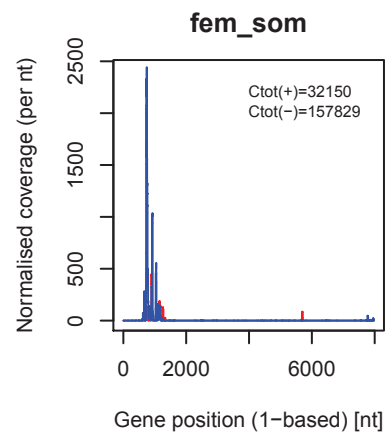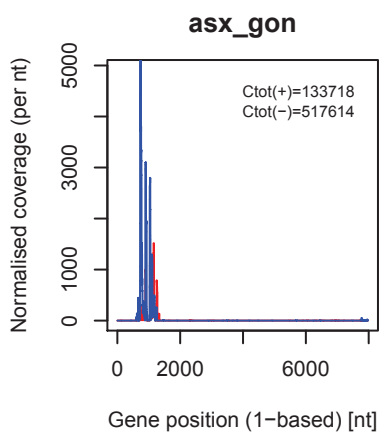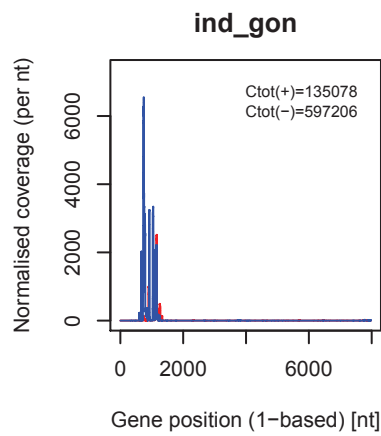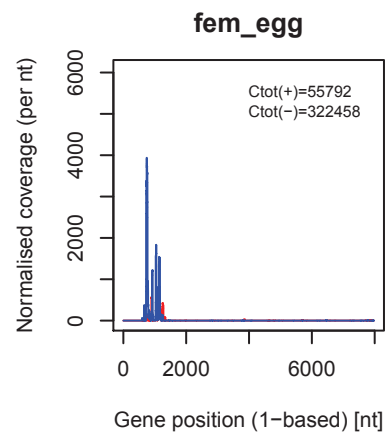

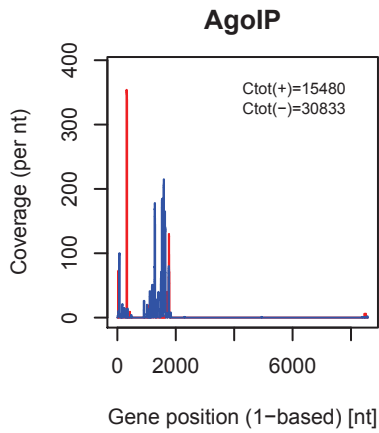

L1-1A\_VC

Red=plus strand  
Blue=minus strand

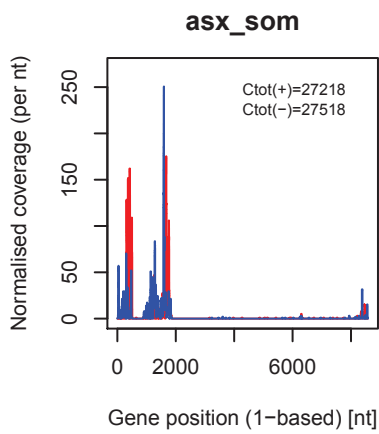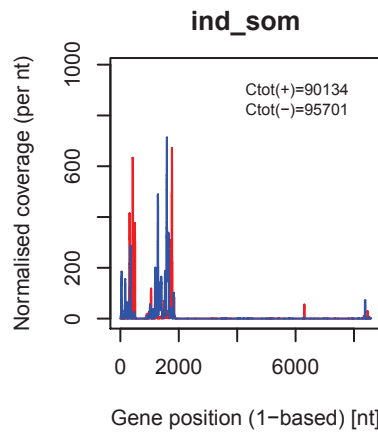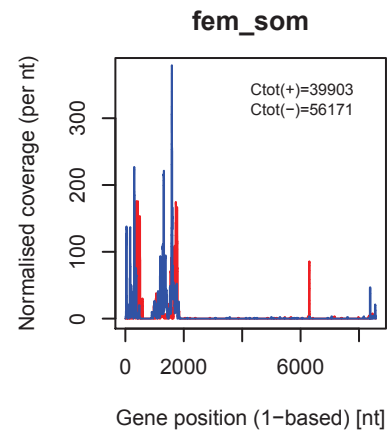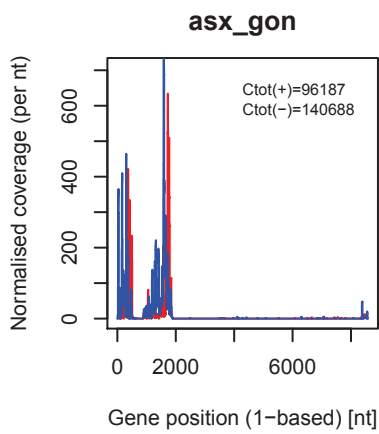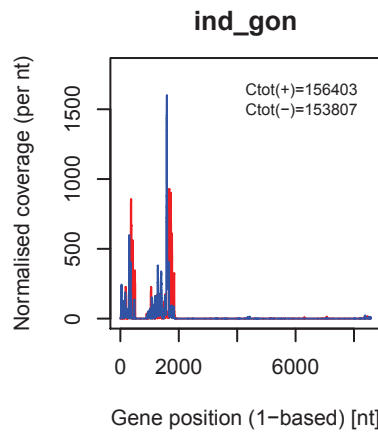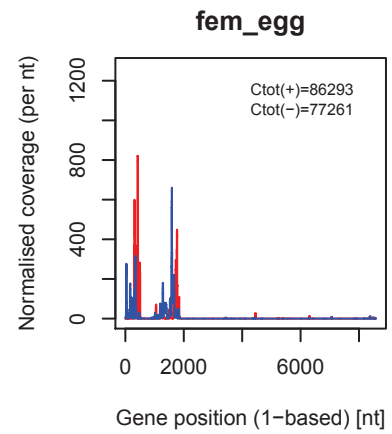

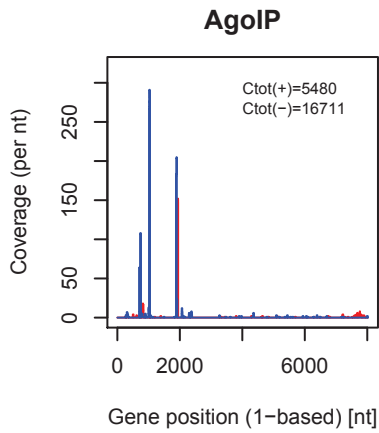

L1-2\_VC

Red=plus strand  
Blue=minus strand

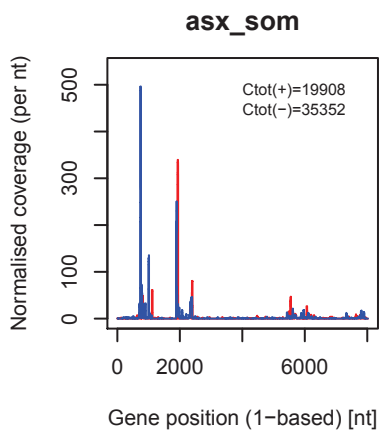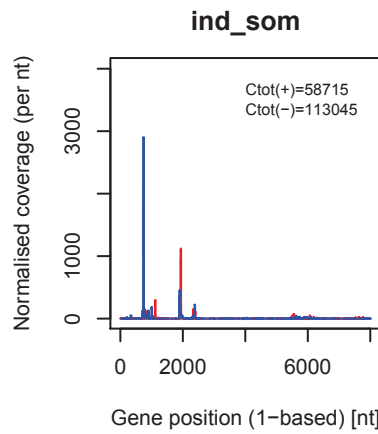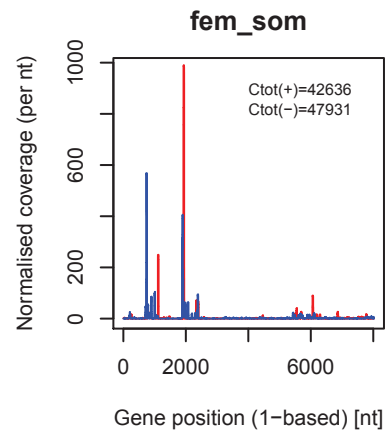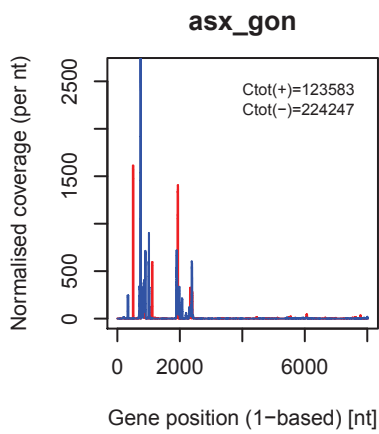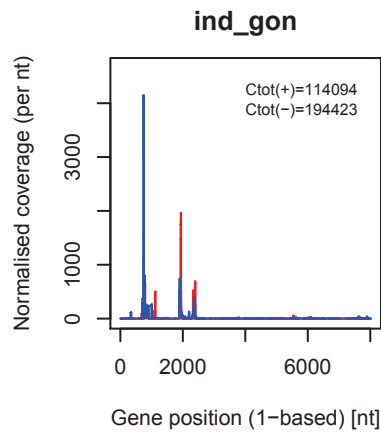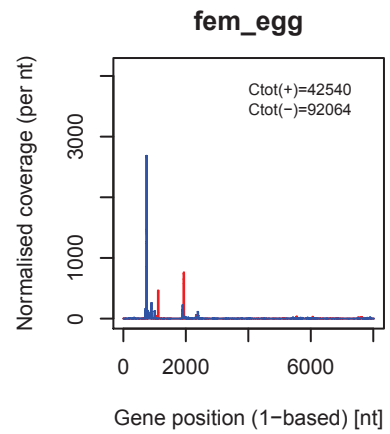

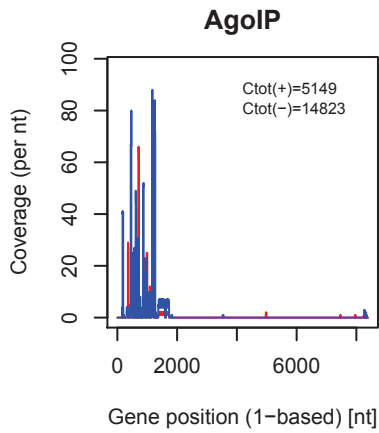

L1-3\_VC

Red=plus strand  
Blue=minus strand

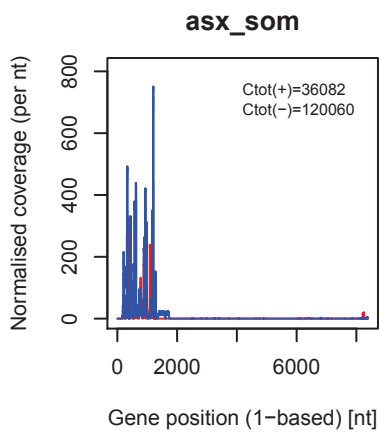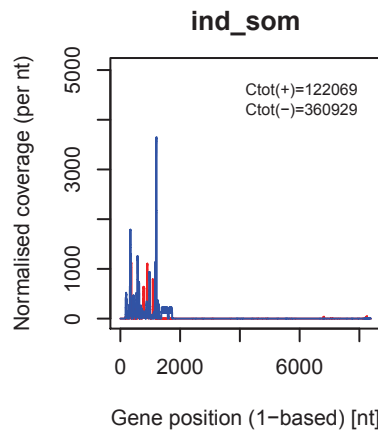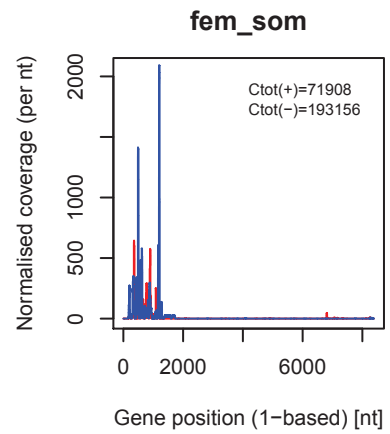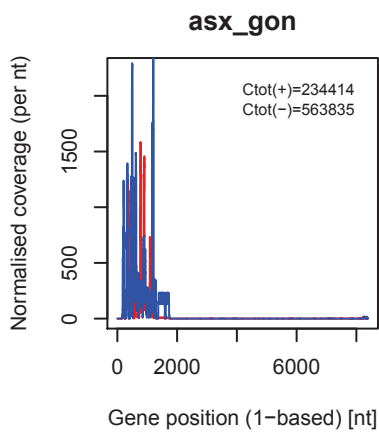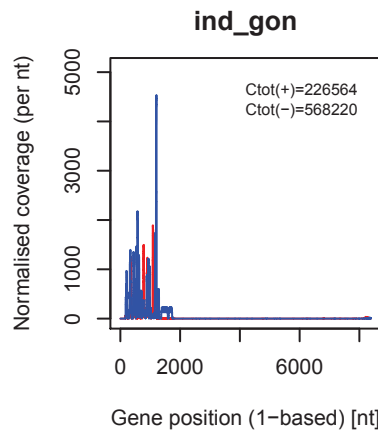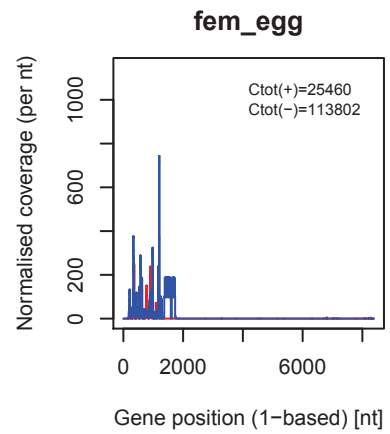

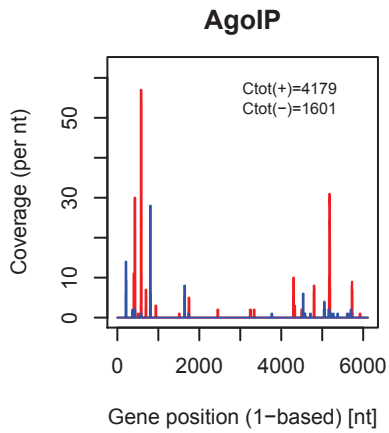

L1-4\_VC

Red=plus strand  
Blue=minus strand

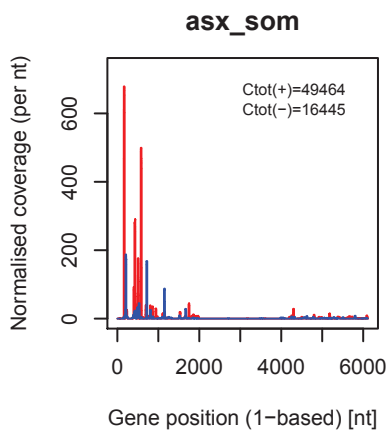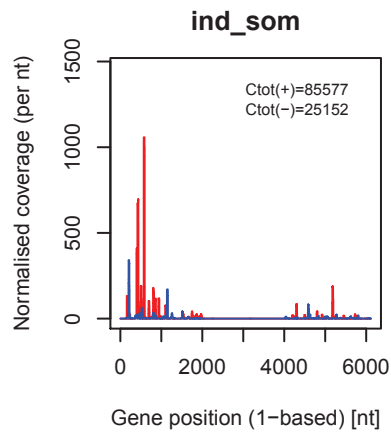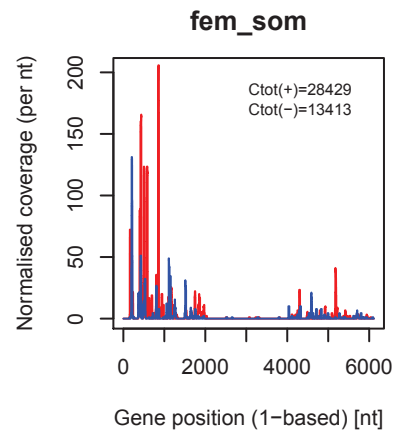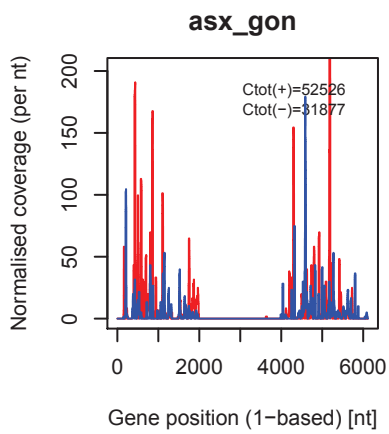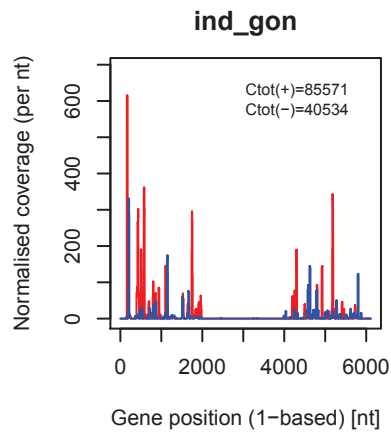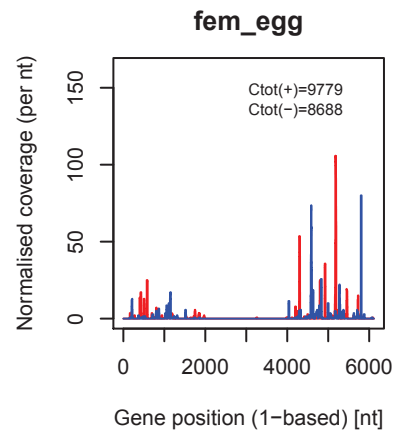

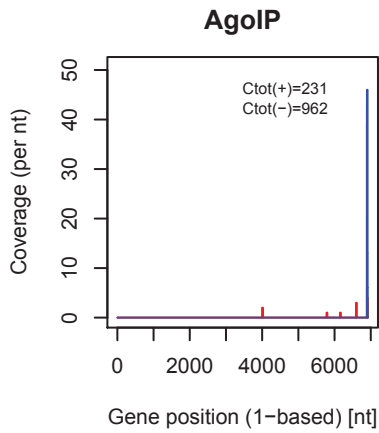

L1-5\_VC

Red=plus strand  
Blue=minus strand

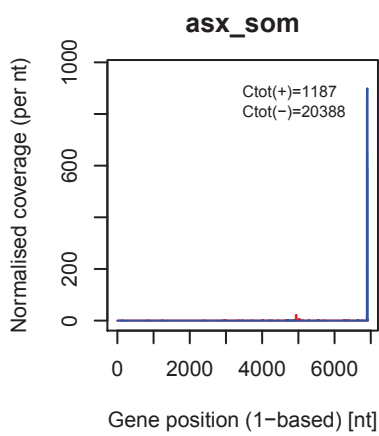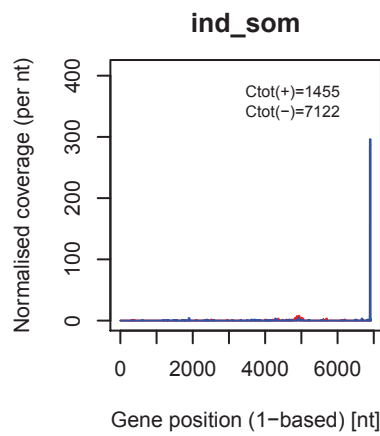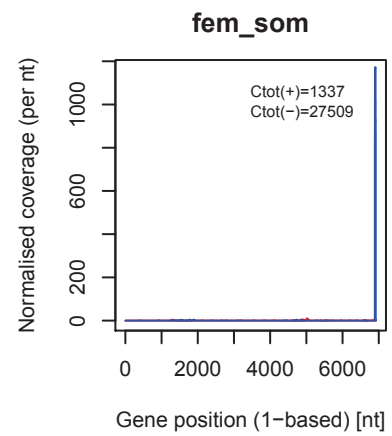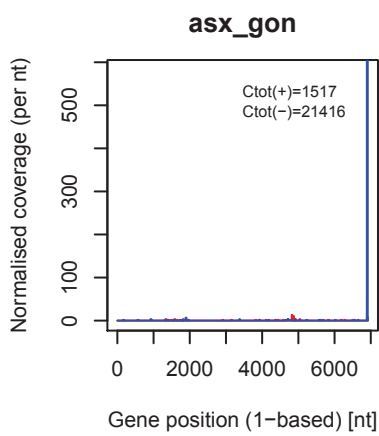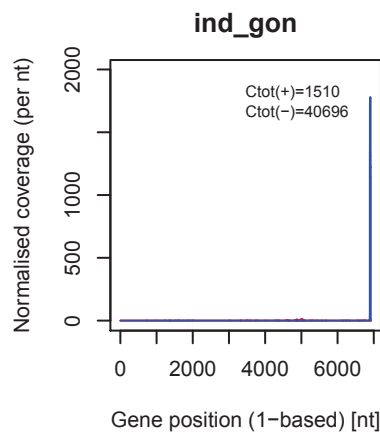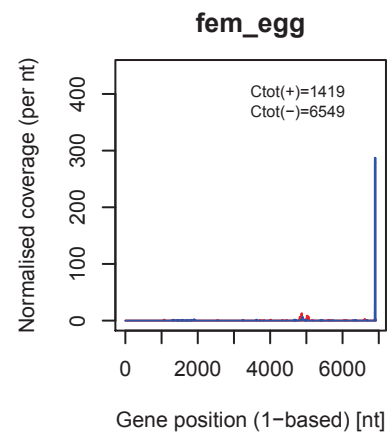

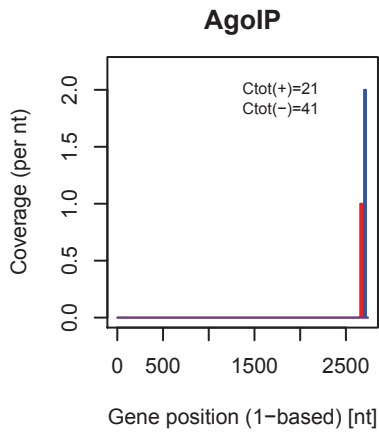

L1-6\_VC

Red=plus strand  
Blue=minus strand

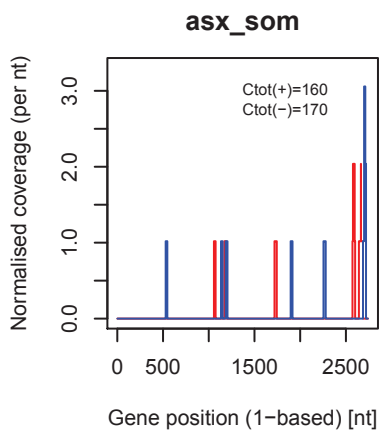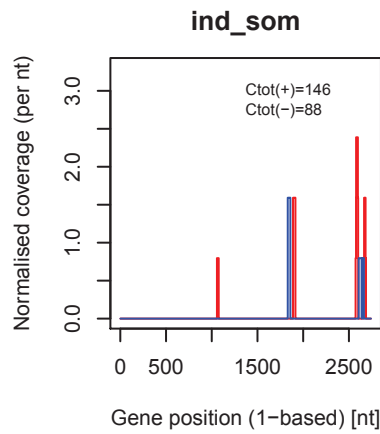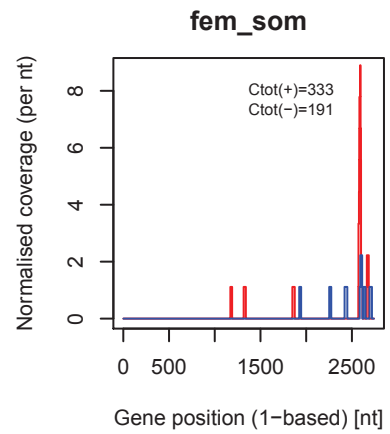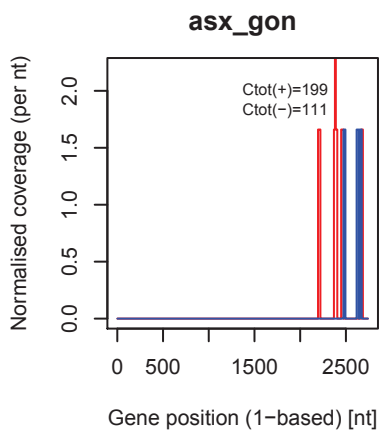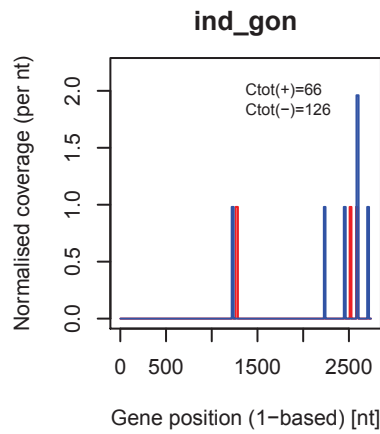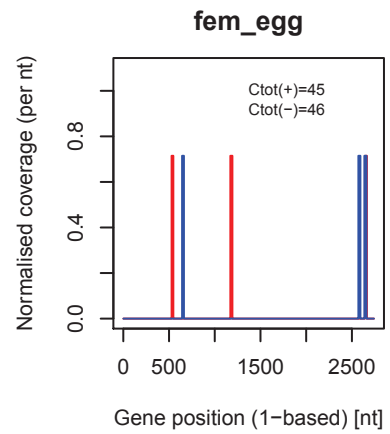

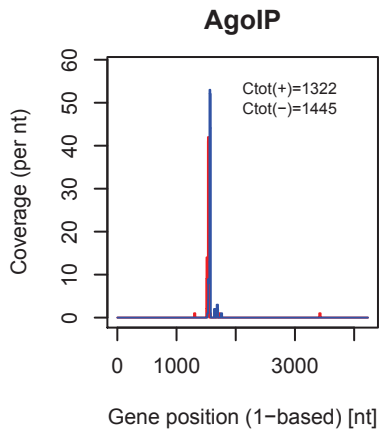

Lueckenbuesser\_I

Red=plus strand  
Blue=minus strand

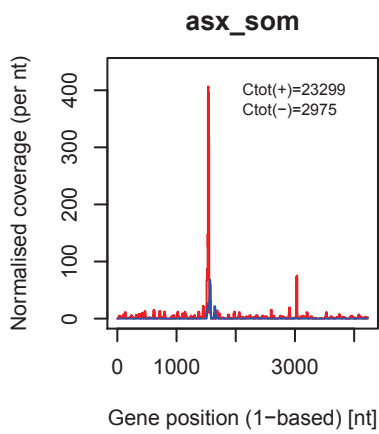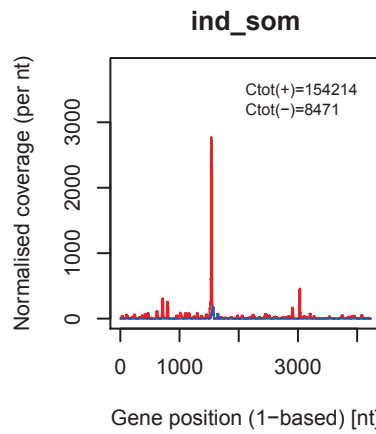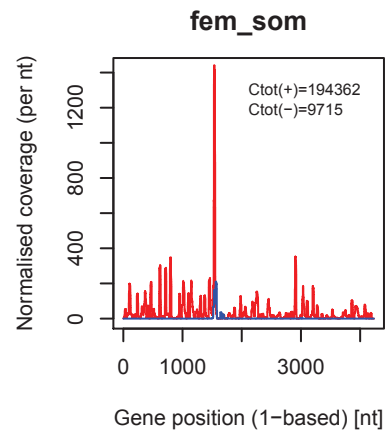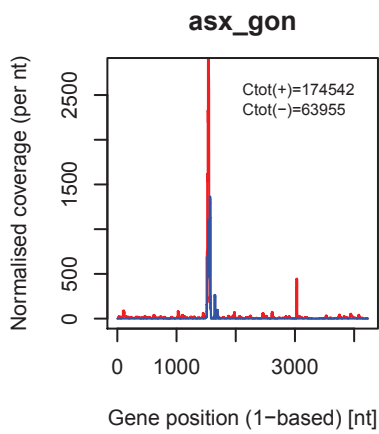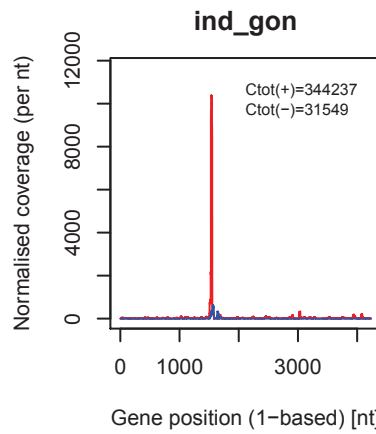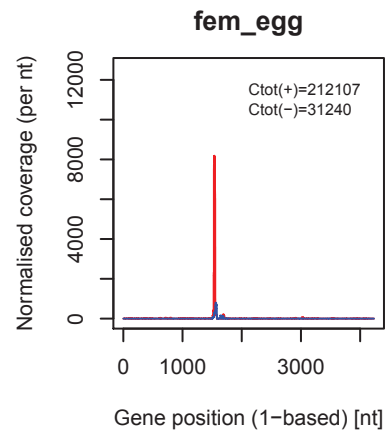



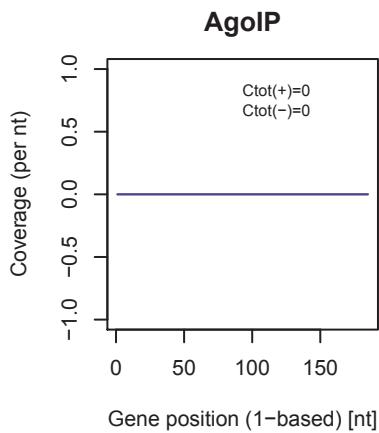

Lueckenbuesser\_LTR

Red=plus strand  
Blue=minus strand

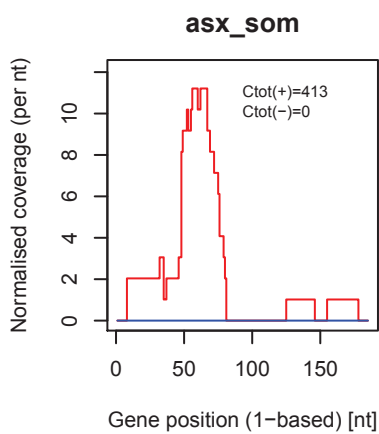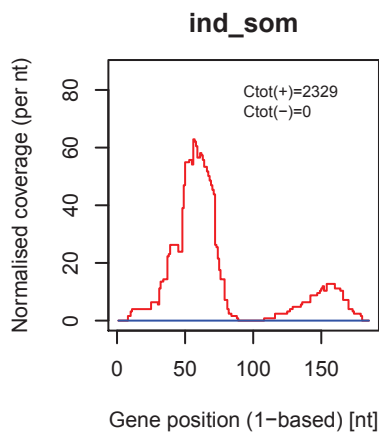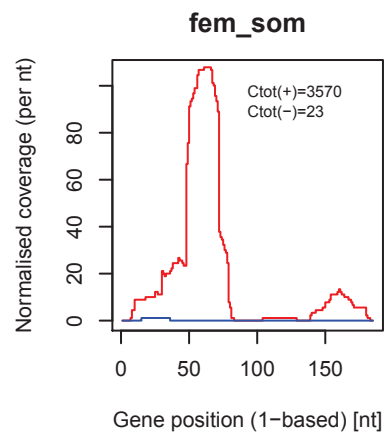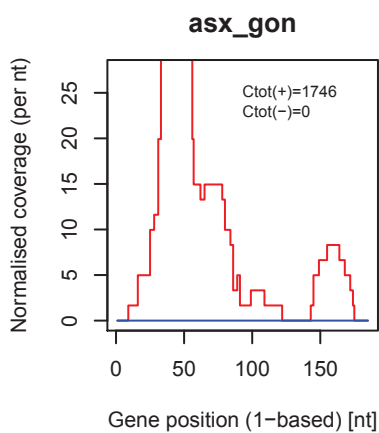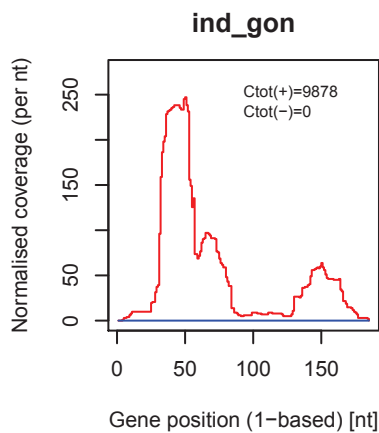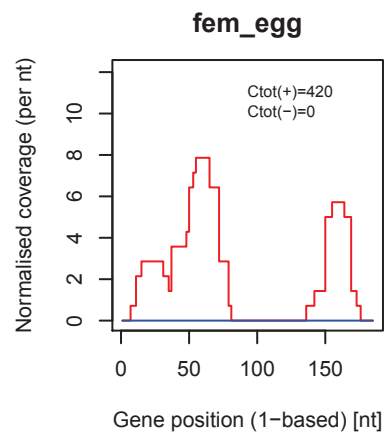

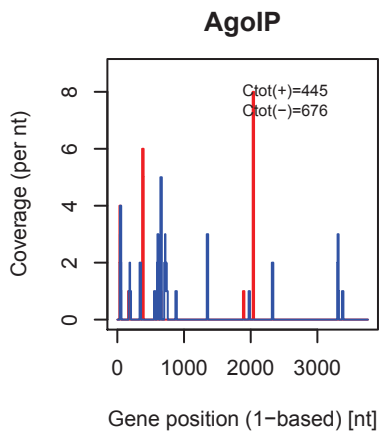

Lusen\_I

Red=plus strand  
Blue=minus strand

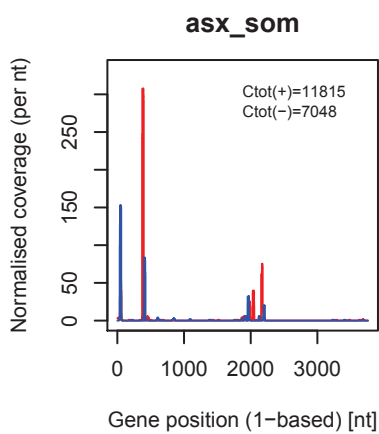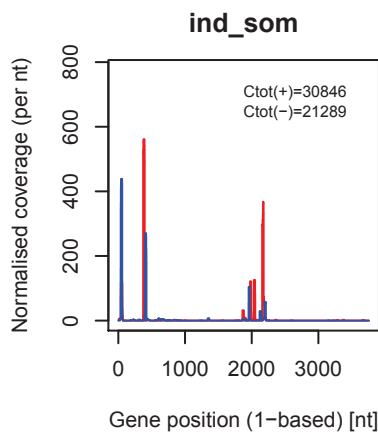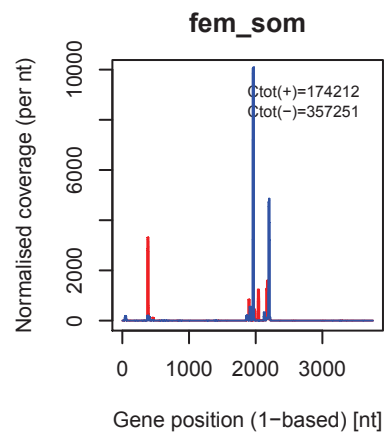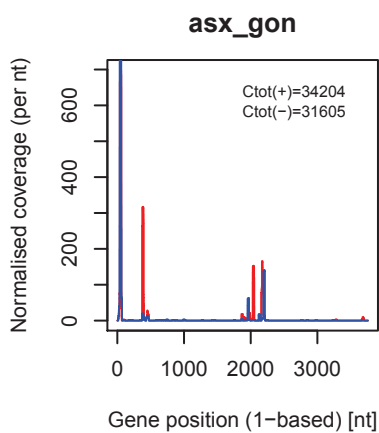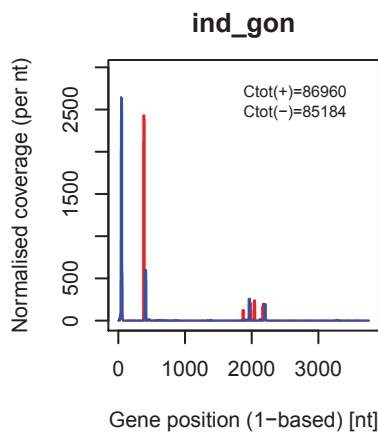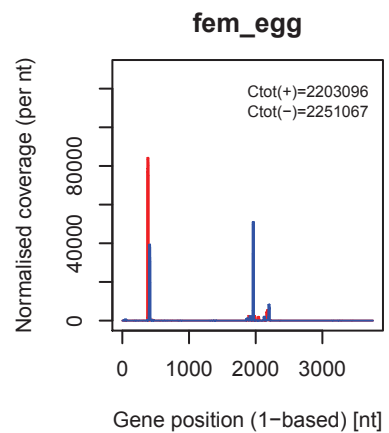

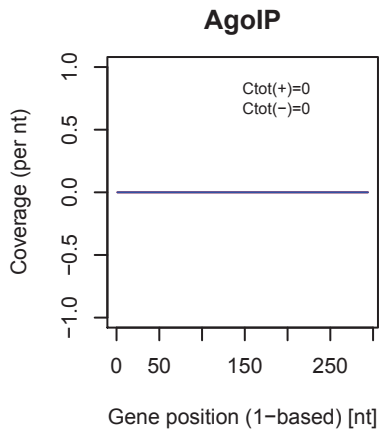

Lusen\_LTR

Red=plus strand  
Blue=minus strand

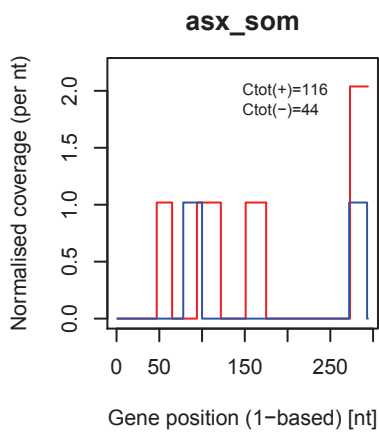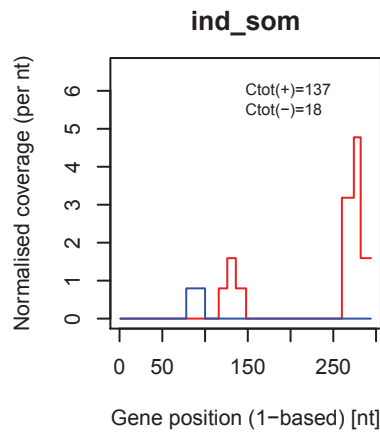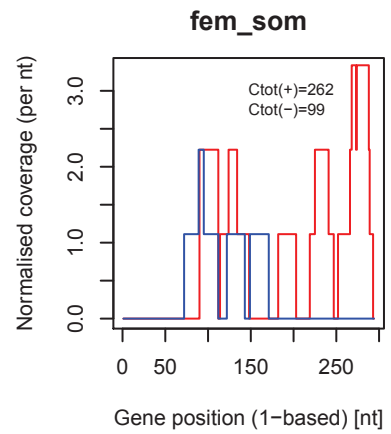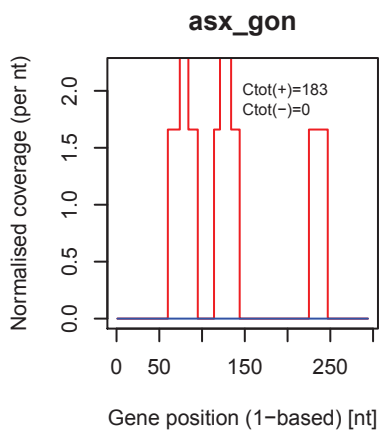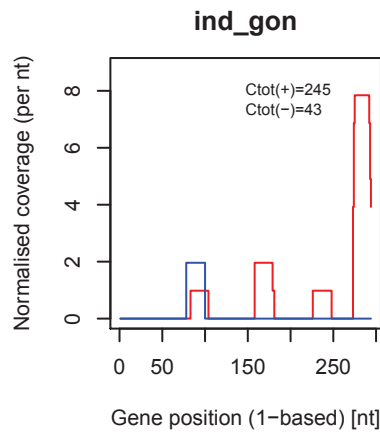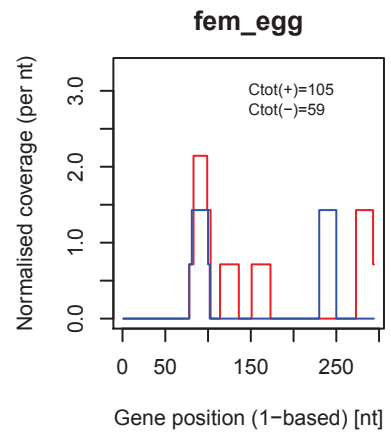

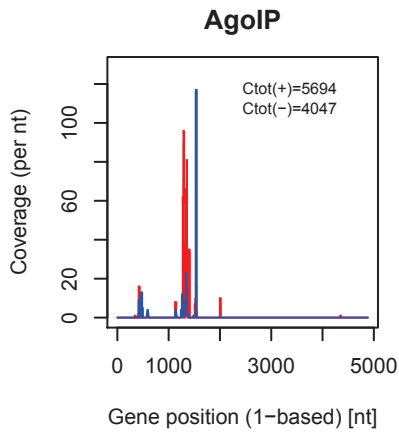

OSSER

Red=plus strand  
Blue=minus strand

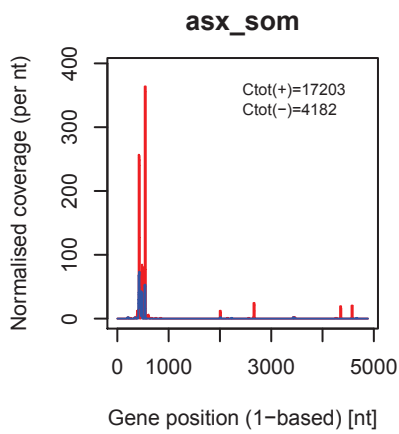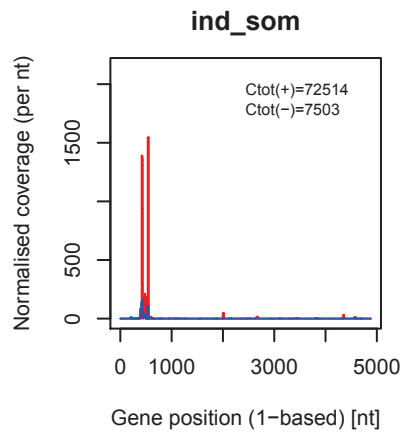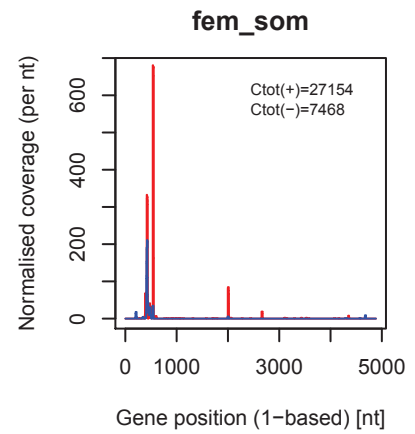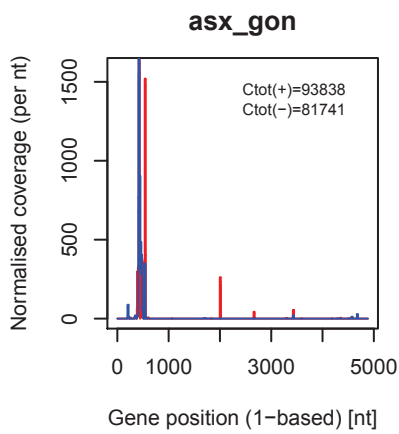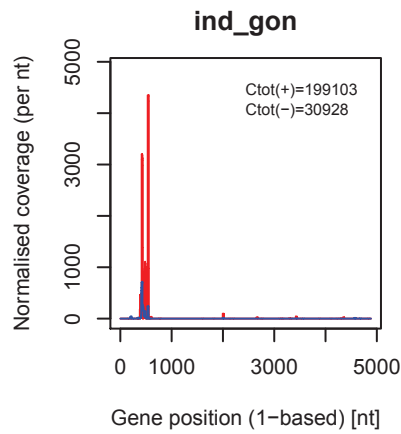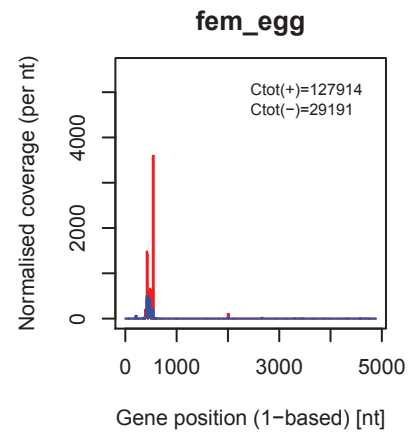

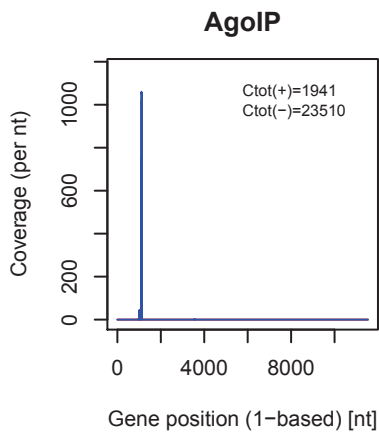

Randl-1\_VC

Red=plus strand  
Blue=minus strand

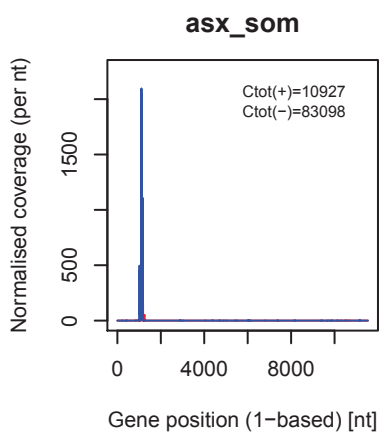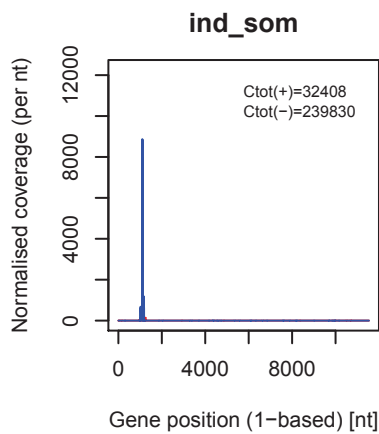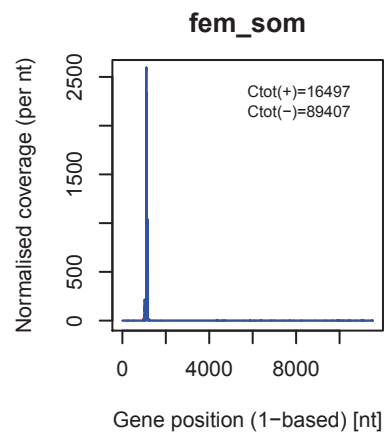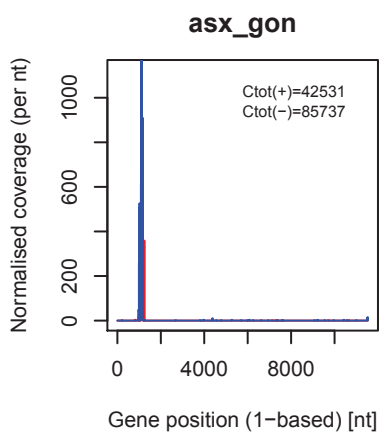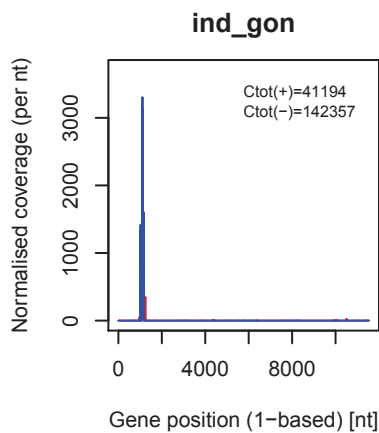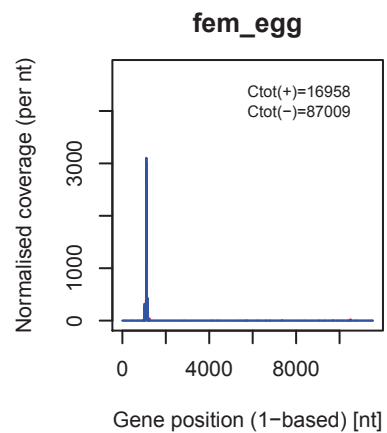

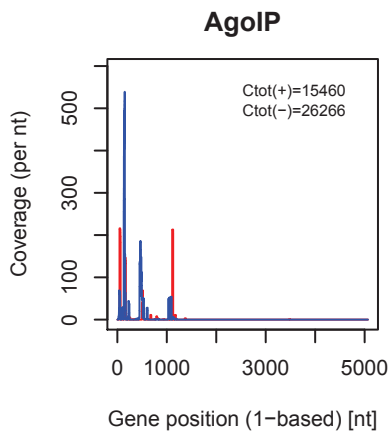

RTEX-1\_VC

Red=plus strand  
Blue=minus strand

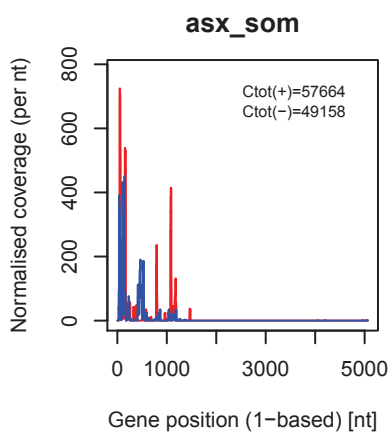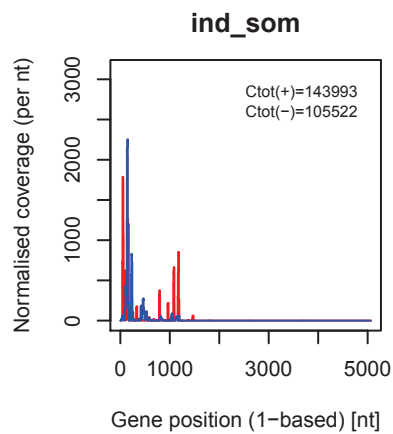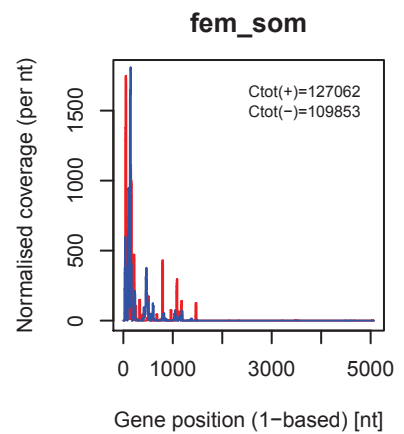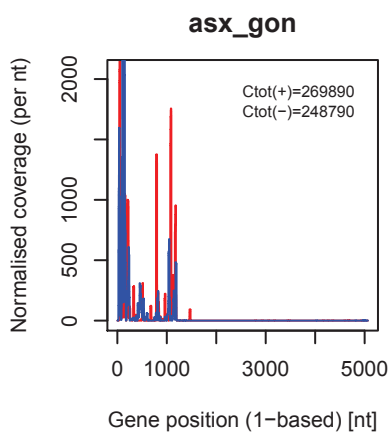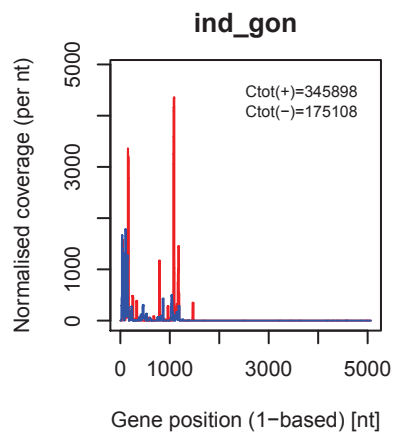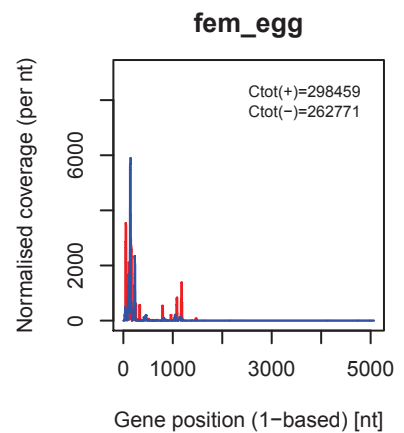

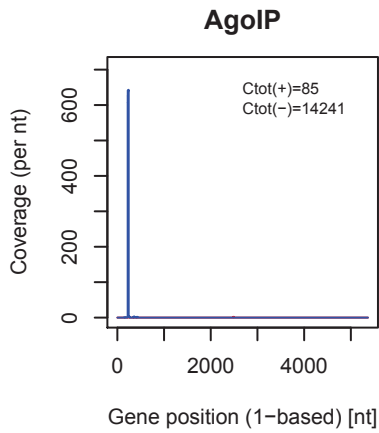

RTEX-2\_VC

Red=plus strand  
Blue=minus strand

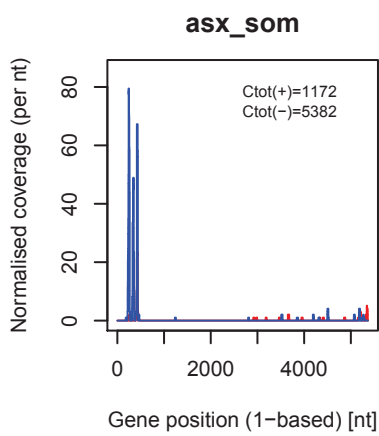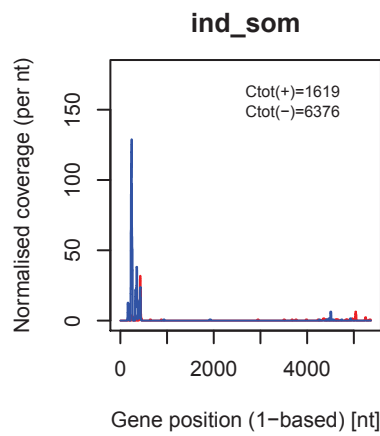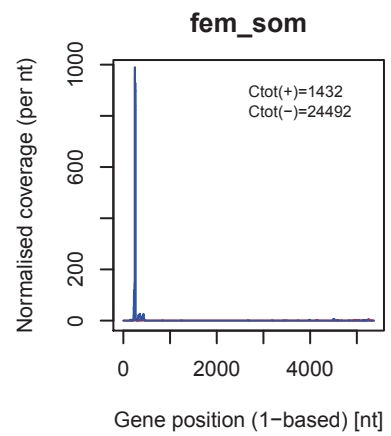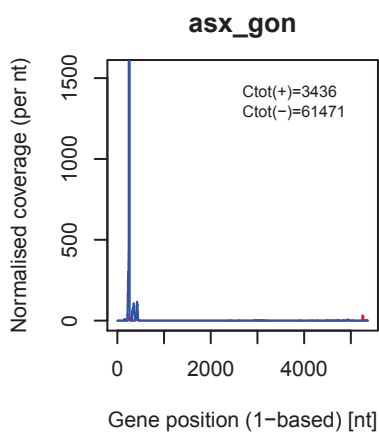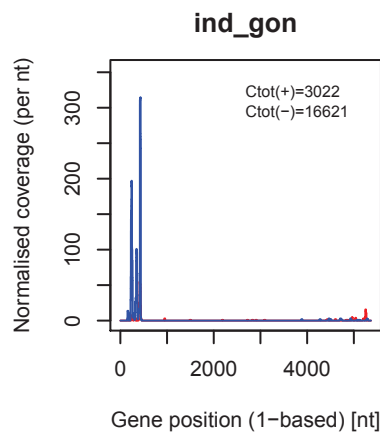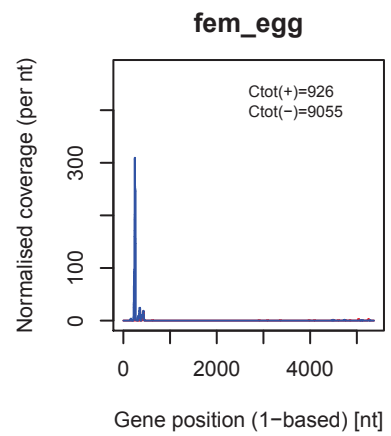

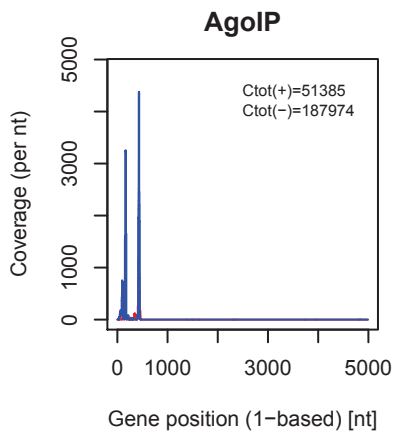

RTEX-3\_VC

Red=plus strand  
Blue=minus strand

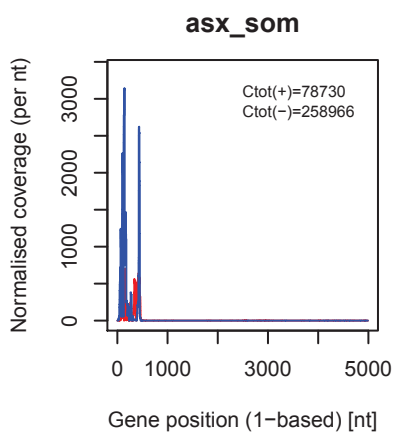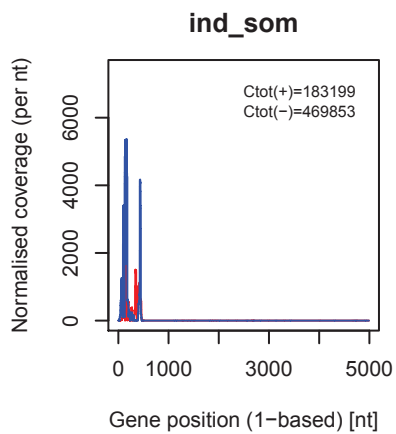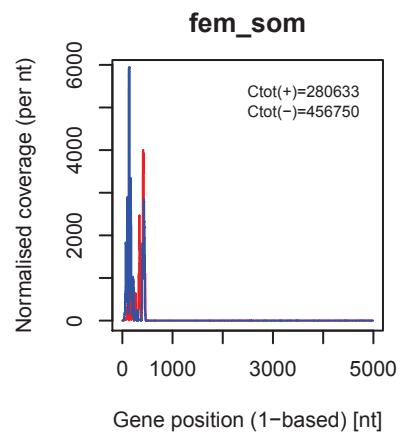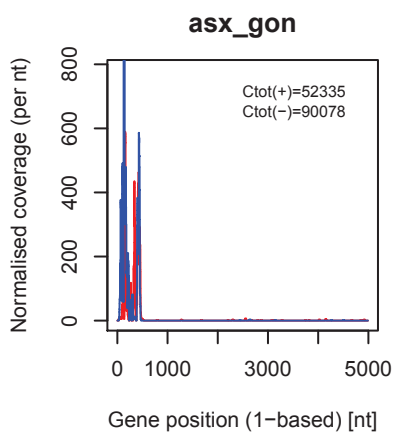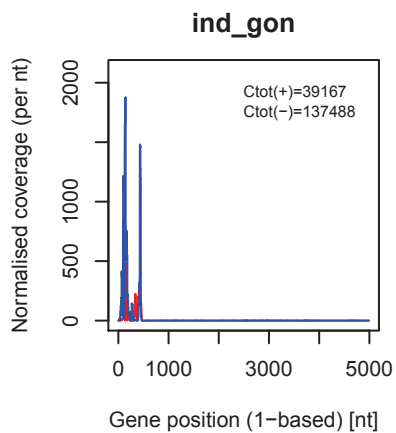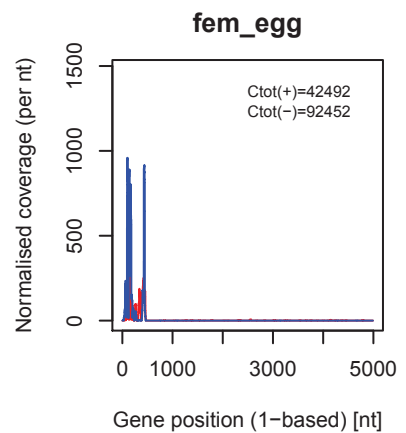



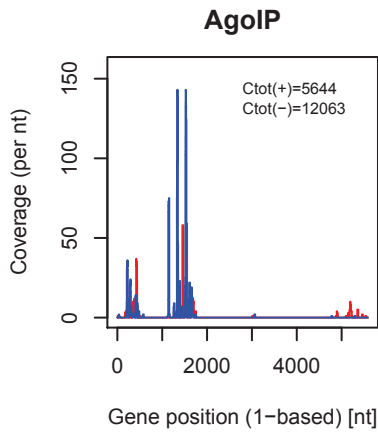

RTEX-4\_VC

Red=plus strand  
Blue=minus strand

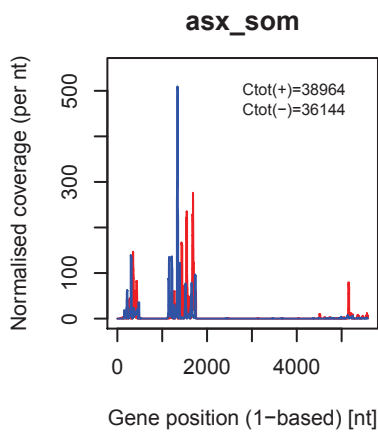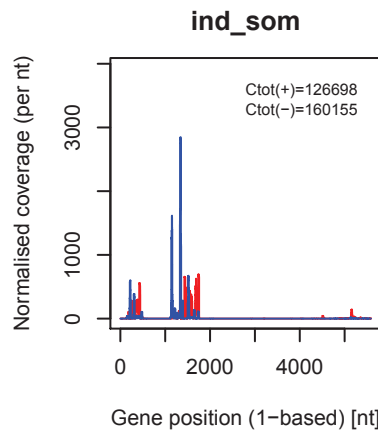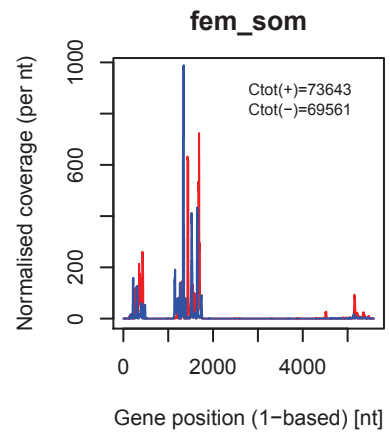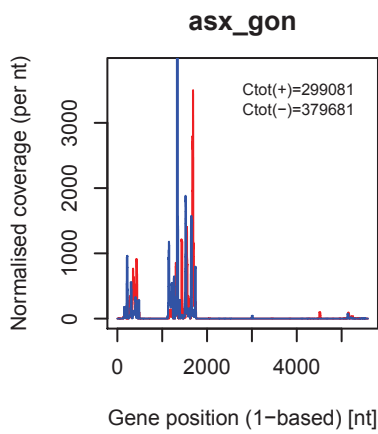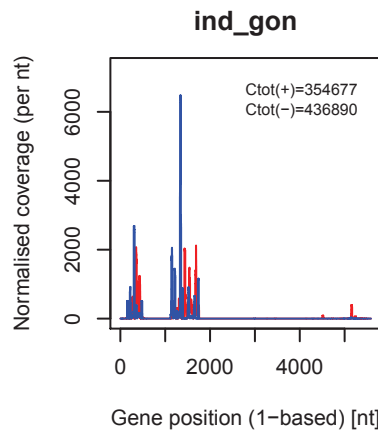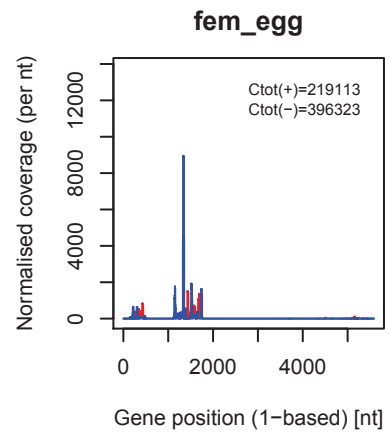

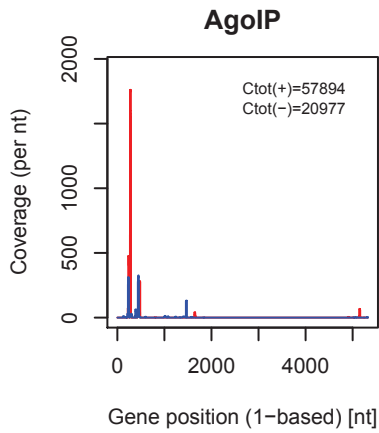

RTEX-5\_VC

Red=plus strand  
Blue=minus strand

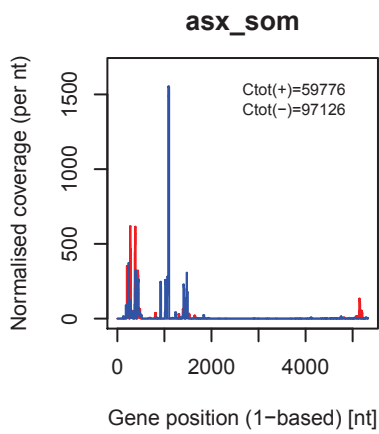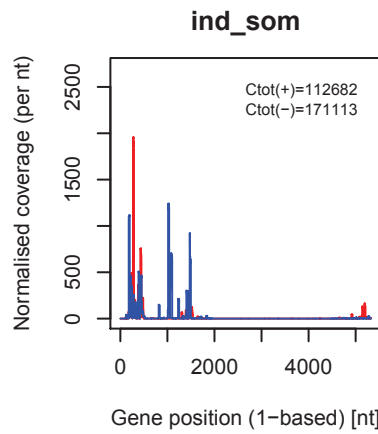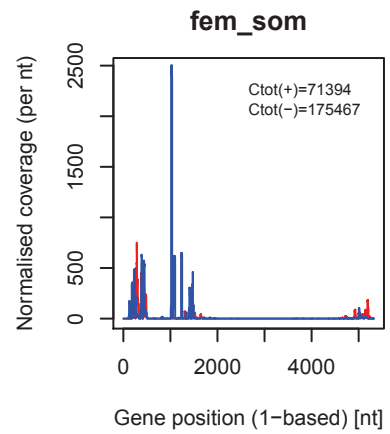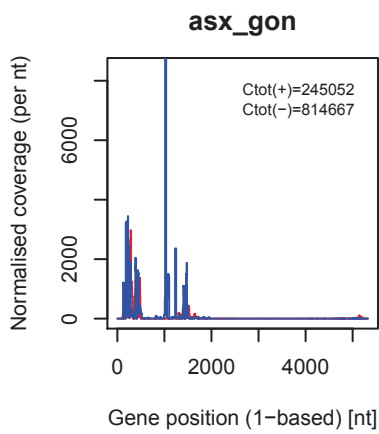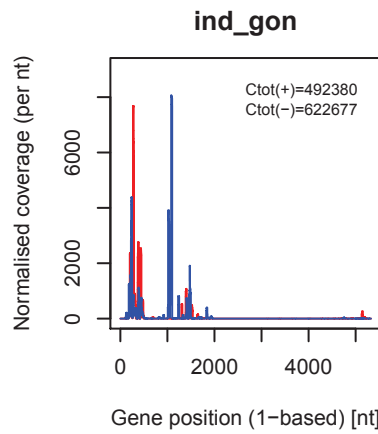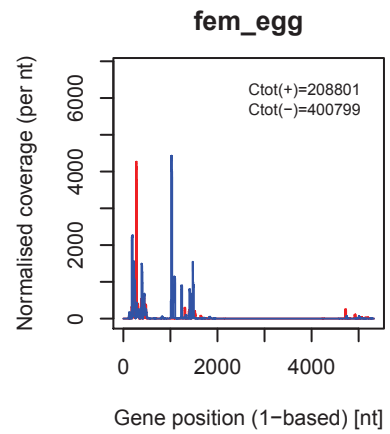

Supplement: 12864_2016_3202_MOESM6_ESM.pdf [file 12864_2016_3202_MOESM6_ESM.pdf]
