# Supplementary material for: Gene silencing pathways found in the green alga Volvox carteri reveal insights into evolution and origins of small RNA systems in plants
Source: PubMed Central journal article supplement (PMC5093975; doi:10.1186/s12864-016-3202-4), 2016-11-02
Supplement: 12864_2016_3202_MOESM1_ESM.pdf [file 12864_2016_3202_MOESM1_ESM.pdf]

Additional file 1: Table S1: Read count and mapping efficiencies of small RNA and RNA-Seq libraries used in this study.

### Small RNA sequencing

| Library                   | Number of mapped reads | Mapping efficiency |
|---------------------------|------------------------|--------------------|
| Ago3 IP                   | $2.4 \times 10^6$      | 89.2%              |
| Vegetative, somatic cells | $4.4 \times 10^6$      | 91.5%              |
| Vegetative, gonidia       | $8.6 \times 10^6$      | 83.4%              |
| Induced, somatic cells    | $13.0 \times 10^6$     | 92.4%              |
| Induced, gonidia          | $17.0 \times 10^6$     | 90.3%              |
| Female, somatic cells     | $8.0 \times 10^6$      | 91.0%              |
| Female, egg cells         | $17.2 \times 10^6$     | 92.7%              |

### RNA-Seq

| Library                          | Number of mapped read pairs | Mapping efficiency |
|----------------------------------|-----------------------------|--------------------|
| Vegetative, somatic cells, rep 1 | $26.2 \times 10^6$          | 90.6%              |
| Vegetative, somatic cells, rep 2 | $26.3 \times 10^6$          | 83.3%              |
| Vegetative, gonidia, rep 1       | $26.0 \times 10^6$          | 89.8%              |
| Vegetative, gonidia, rep 2       | $18.9 \times 10^6$          | 83.0%              |
| Induced, somatic cells, rep 1    | $19.7 \times 10^6$          | 88.4%              |
| Induced, somatic cells, rep 2    | $20.0 \times 10^6$          | 78.5%              |
| Induced, gonidia, rep 1          | $4.6 \times 10^6$           | 69.4%              |
| Induced, gonidia, rep 2          | $3.0 \times 10^6$           | 65.2%              |
| Female, somatic cells, rep 1     | $16.4 \times 10^6$          | 87.5%              |
| Female, somatic cells, rep 2     | $22.3 \times 10^6$          | 81.5%              |
| Female, egg cells, rep 1         | $19.2 \times 10^6$          | 80.7%              |
| Female, egg cells, rep 2         | $33.3 \times 10^6$          | 87.3%              |
