# Supplementary material for: Gene silencing pathways found in the green alga Volvox carteri reveal insights into evolution and origins of small RNA systems in plants
Source: PubMed Central journal article supplement (PMC5093975; doi:10.1186/s12864-016-3202-4), 2016-11-02
Supplement: 12864_2016_3202_MOESM3_ESM.pdf [file 12864_2016_3202_MOESM3_ESM.pdf]

## Additional file 3: Table S2. Full list of identified miRNA sequences in this study.

| miRNA    | Arm | Start    | Stop     | Chr          | Strand | Start(pre) | Stop(pre) | Assignment | Sequence                     |
|----------|-----|----------|----------|--------------|--------|------------|-----------|------------|------------------------------|
| MIR125   | 5p  | 4726198  | 4726219  | scaffold_3   | plus   | 4726163    | 4726380   | mature1    | AACCACCTGGAGCTGTGGATGG       |
| MIR126   | 3p  | 805580   | 805600   | scaffold_39  | minus  | 805533     | 805783    | mature1    | AAGAAGTCCAACCCAGCGGGA        |
| MIR127   | 5p  | 486015   | 486036   | scaffold_53  | minus  | 485815     | 486046    | mature2    | ACCGACCGTTTGGGGCCCATTA       |
| MIR128   | 3p  | 3611562  | 3611581  | scaffold_5   | minus  | 3611556    | 3611879   | mature3    | ACGCATAGACATAGACATGT         |
| MIR129   | 5p  | 1495329  | 1495349  | scaffold_3   | plus   | 1495303    | 1495399   | mature1    | ACGGGTTACCAGGTTGGTCA         |
| MIR130   | 3p  | 10194    | 10214    | scaffold_3   | plus   | 10041      | 10233     | mature1    | AGCAGCGGTACACGACCCGGT        |
| MIR130*  | 5p  | 10063    | 10082    | scaffold_3   | plus   | 10041      | 10233     | star1      | TGGTCTGATATCGCTGCTC          |
| MIR131   | 5p  | 343927   | 343948   | scaffold_62  | plus   | 343925     | 343990    | mature1    | AGGGATTGGTTCGGGTACCGG        |
| MIR132   | 3p  | 7202337  | 7202360  | scaffold_1   | minus  | 7202286    | 7202667   | mature3    | AGTAGACGAGAACGCACTCAGGAA     |
| MIR133   | 5p  | 110377   | 110398   | scaffold_81  | minus  | 110176     | 110519    | mature2    | ATCTTCGTAGGCCATGAAGGCC       |
| MIR134   | 3p  | 1279127  | 1279147  | scaffold_27  | minus  | 1279066    | 1279381   | mature1    | ATGGAAATGCCGACTTGGGTT        |
| MIR134*  | 5p  | 1279334  | 1279355  | scaffold_27  | minus  | 1279066    | 1279381   | star1      | ACCAAGTCGGCATTTCATGCG        |
| MIR135a  | 3p  | 31072    | 31093    | scaffold_15  | minus  | 31055      | 31256     | mature1    | ATGGCGACGGTGGCAGTGGCGA       |
| MIR135a* | 5p  | 31220    | 31240    | scaffold_15  | minus  | 31055      | 31256     | star1      | TGCCATTGCTGCCCTCGCCA         |
| MIR135b  | 3p  | 102568   | 102589   | scaffold_50  | minus  | 102566     | 102675    | mature1    | ATGGCGACGGTGGCAGTGGCGA       |
| MIR135b* | 5p  | 102649   | 102669   | scaffold_50  | minus  | 102566     | 102675    | star1      | TGCCGCTGTGCCATCCCTGC         |
| MIR135c  | 3p  | 468240   | 468261   | scaffold_38  | minus  | 468202     | 468446    | mature1    | ATGGCGACGGTGGCAGTGGCGA       |
| MIR135c* | 5p  | 468388   | 468408   | scaffold_38  | minus  | 468202     | 468446    | star1      | TGCCATTGCGCGCTCGCCA          |
| MIR136   | 3p  | 4726355  | 4726375  | scaffold_3   | plus   | 4726163    | 4726380   | mature2    | CAAATCTCTGCAAGGCACGGA        |
| MIR137   | 5p  | 366807   | 366827   | scaffold_67  | minus  | 366629     | 366893    | mature1    | CATGTGGATGCTGTATTGTCA        |
| MIR137*  | 3p  | 366695   | 366716   | scaffold_67  | minus  | 366629     | 366893    | star1      | TGACAATACAGCATCCACATGT       |
| MIR138   | 3p  | 275506   | 275526   | scaffold_38  | plus   | 275353     | 275551    | mature1    | CCAAACGGTCGGTAACCGGCA        |
| MIR138*  | 5p  | 275371   | 275391   | scaffold_38  | plus   | 275353     | 275551    | star1      | TAAACATGCCGGTACCAGCC         |
| MIR139   | 3p  | 150722   | 150743   | scaffold_74  | minus  | 150629     | 150848    | mature2    | CCATGGCGCTCGTGACGGAGGT       |
| MIR140   | 3p  | 1326333  | 1326355  | scaffold_2   | minus  | 1326323    | 1326644   | mature2    | CCCACGACATCGGCCAGCTGGTT      |
| MIR141   | 3p  | 2460     | 2481     | scaffold_966 | plus   | 2310       | 2517      | mature1    | CCCTTTAGGGGAAGAGGGGGA        |
| MIR142a  | 5p  | 953294   | 953315   | scaffold_38  | plus   | 953249     | 953383    | mature1    | CCCTAAAGGGGAACATAAGGGG       |
| MIR142a* | 5p  | 953261   | 953283   | scaffold_38  | plus   | 953249     | 953383    | star1      | CCCTTTGGTCCCTTTAGGGGA        |
| MIR142b  | 3p  | 7444     | 7466     | scaffold_80  | minus  | 7432       | 7506      | mature1    | CCCTAAAGGGGAACATAAGGGG       |
| MIR142b* | 5p  | 7477     | 7499     | scaffold_80  | minus  | 7432       | 7506      | star1      | CCCTTTGGTCCCTTTAGGGGA        |
| MIR142c  | 3p  | 1055790  | 1055812  | scaffold_19  | plus   | 1055740    | 1055860   | mature1    | CCCTAAAGGGGAACATAAGGGG       |
| MIR143   | 5p  | 75172    | 75192    | scaffold_11  | plus   | 75139      | 75230     | mature1    | CCCTTTAGGGGAAGAGGGGGA        |
| MIR144   | 3p  | 10309626 | 10309653 | scaffold_1   | plus   | 10309579   | 10309660  | mature1    | CCCTTTAGGGGATGAAGAACTAAAGGGG |
| MIR145   | 3p  | 10309885 | 10309907 | scaffold_1   | plus   | 10309809   | 10309921  | mature1    | CCCTTTAGTTCCCTTTAGGGGA       |
| MIR145*  | 5p  | 10309828 | 10309850 | scaffold_1   | plus   | 10309809   | 10309921  | star1      | AGGGGACGAACTAAAGGGGAC        |
| MIR146   | 5p  | 219373   | 219395   | scaffold_54  | minus  | 219336     | 219400    | mature1    | CCCTTTGGTCCCTAAAGGGGGA       |
| MIR147   | 5p  | 1901494  | 1901515  | scaffold_20  | minus  | 1901332    | 1901534   | mature2    | CGGTTACCAGCCGTTCCGGGGC       |
| MIR148   | 5p  | 1697868  | 1697889  | scaffold_3   | plus   | 1697828    | 1698039   | mature1    | GGAACATAGTCGACAGTGTGT        |
| MIR148*  | 3p  | 1697981  | 1698001  | scaffold_3   | plus   | 1697828    | 1698039   | star1      | CAAGCACTGCGACTAGTTTTCG       |
| MIR149   | 3p  | 3611656  | 3611677  | scaffold_5   | minus  | 3611556    | 3611879   | mature2    | CGGAAGAACTTTGACAGCATT        |
| MIR150   | 3p  | 1901335  | 1901356  | scaffold_20  | minus  | 1901332    | 1901534   | mature1    | CGGCTGTTTATGCCATAGGGC        |
| MIR151   | 5p  | 12358    | 12380    | scaffold_18  | minus  | 12152      | 12423     | mature2    | CTGTACCGGAGCACCCACCTGGC      |
| MIR152   | 5p  | 169276   | 169295   | scaffold_28  | plus   | 169217     | 169357    | mature1    | CTGTCTGAGCATAATAAGCT         |
| MIR153   | 5p  | 2517150  | 2517169  | scaffold_17  | minus  | 2517118    | 2517176   | mature1    | CTGTCTGAGCATAATTTTAG         |
| MIR154   | 3p  | 379961   | 379981   | scaffold_8   | minus  | 379870     | 380165    | mature2    | GAAATAGAATGGACTCCGTTT        |
| MIR155a  | 5p  | 21735    | 21757    | scaffold_39  | plus   | 21702      | 22029     | mature1    | GCAGGGTAGGCTCCGGCAGTGCC      |
| MIR155b  | 5p  | 476082   | 476104   | scaffold_17  | plus   | 476049     | 476360    | mature1    | GCAGGGTAGGCTCCGGCAGTGCC      |
| MIR156   | 3p  | 1397467  | 1397486  | scaffold_31  | minus  | 1397432    | 1397636   | mature1    | GGAGGGCGGTGTTGGGCTGG         |
| MIR157   | 5p  | 63843    | 63866    | scaffold_85  | minus  | 63583      | 63928     | mature2    | GGCGGCTGGACAGGATTGCTCCGT     |
| MIR158   | 3p  | 1728500  | 1728522  | scaffold_27  | plus   | 1728277    | 1728550   | mature2    | TGTTGGGAGCCGCTGCACAACCT      |
| MIR158*  | 5p  | 1728309  | 1728329  | scaffold_27  | plus   | 1728277    | 1728550   | star2      | TTGTGACAGCGCTCCCCACC         |
| MIR159   | 3p  | 3826986  | 3827005  | scaffold_5   | plus   | 3826655    | 3827079   | mature1    | TAAAGAAAGAGATCGTGGGG         |
| MIR159*  | 5p  | 3826732  | 3826752  | scaffold_5   | plus   | 3826655    | 3827079   | star1      | CCACGATCTCTCTTTAGCT          |
| MIR160   | 3p  | 324188   | 324209   | scaffold_51  | plus   | 323928     | 324247    | mature1    | TAAAGACTCGTAACTGAGG          |
| MIR160*  | 5p  | 323969   | 323991   | scaffold_51  | plus   | 323928     | 324247    | star1      | TCAGGTTAGCGAGTCTTTAGCA       |
| MIR161   | 5p  | 326778   | 326798   | scaffold_23  | plus   | 326756     | 327011    | mature1    | TAAACATGCCGGTACCAGCC         |
| MIR162   | 5p  | 238423   | 238445   | scaffold_13  | plus   | 238352     | 238683    | mature2    | TAAACTTGCAGGACGCTAACCTT      |
| MIR163   | 3p  | 1809887  | 1809908  | scaffold_27  | minus  | 1809869    | 1810180   | mature1    | TAAAGGAACTCCGTACGCGA         |
| MIR163*  | 5p  | 1810140  | 1810161  | scaffold_27  | minus  | 1809869    | 1810180   | star1      | TCCGTACGGAGCCCTTTACG         |
| MIR164a  | 5p  | 626328   | 626348   | scaffold_7   | minus  | 626265     | 626356    | mature1    | TAACAAGGCGGTGGGGCTCC         |
| MIR164b  | 5p  | 172821   | 172841   | scaffold_1   | minus  | 172757     | 172847    | mature1    | TAACAAGGCGGTGGGGCTCC         |
| MIR164c  | 5p  | 285557   | 285577   | scaffold_60  | minus  | 285442     | 285585    | mature1    | TAACAAGGCGGTGGGGCTCC         |
| MIR164d  | 5p  | 1439653  | 1439673  | scaffold_29  | minus  | 1439549    | 1439679   | mature1    | TAACAAGGCGGTGGGGCTCC         |
| MIR165   | 3p  | 283792   | 283811   | scaffold_55  | plus   | 283509     | 283879    | mature1    | TAACAGGTCGGAGCGAAGC          |
| MIR165*  | 5p  | 283631   | 283650   | scaffold_55  | plus   | 283509     | 283879    | star1      | TTCCGCTCCGACCTGGTTACT        |
| MIR166   | 3p  | 552290   | 552310   | scaffold_40  | minus  | 552236     | 552619    | mature1    | TAACGACGCTGTGAGTTTACT        |
| MIR166*  | 5p  | 552437   | 552459   | scaffold_40  | minus  | 552236     | 552619    | star1      | TAAACTCATGACGCTGCTTTAAG      |
| MIR167a  | 3p  | 122671   | 122690   | scaffold_80  | plus   | 122573     | 122706    | mature1    | TAACGGACAGCATAGGACGG         |
| MIR167b  | 3p  | 1084772  | 1084791  | scaffold_4   | minus  | 1084755    | 1084836   | mature1    | TAACGGACAGCATAGGACGG         |
| MIR167c  | 3p  | 656905   | 656924   | scaffold_9   | plus   | 656859     | 656940    | mature1    | TAACGGACAGCATAGGACGG         |
| MIR167d  | 3p  | 1462634  | 1462653  | scaffold_7   | plus   | 1462588    | 1462669   | mature1    | TAACGGACAGCATAGGACGG         |
| MIR167e  | 3p  | 1462605  | 1462624  | scaffold_7   | minus  | 1462585    | 1462672   | mature1    | TAACGGACAGCATAGGACGG         |
| MIR167f  | 3p  | 656876   | 656895   | scaffold_9   | minus  | 656859     | 656940    | mature1    | TAACGGACAGCATAGGACGG         |
| MIR168   | 3p  | 239481   | 239502   | scaffold_47  | minus  | 239480     | 239887    | mature2    | TAACGGCTGCTTGAAGACAC         |
| MIR168*  | 5p  | 239862   | 239883   | scaffold_47  | minus  | 239480     | 239887    | star2      | TCTTGAAGCAGGCCGTTAGTG        |

|           |    |          |                     |       |          |                  |                         |
|-----------|----|----------|---------------------|-------|----------|------------------|-------------------------|
| MIR169    | 3p | 14115811 | 14115833 scaffold_1 | minus | 14115752 | 14115955 mature1 | TAACGGTCGGTTGGGTTAATGGG |
| MIR170    | 3p | 239511   | 239533 scaffold_47  | minus | 239480   | 239887 mature1   | TAAGAGACTTGGTCTACACATGC |
| MIR170*   | 5p | 239837   | 239858 scaffold_47  | minus | 239480   | 239887 star1     | TAGCATGTGTAGACCAAGTCTC  |
| MIR171    | 5p | 469947   | 469969 scaffold_38  | minus | 469890   | 470021 mature1   | TAAGCCAAGCCGTCTCAAGACCC |
| MIR172    | 3p | 125051   | 125071 scaffold_58  | minus | 125033   | 125161 mature1   | TAAGCTTGTGAGTTGGTGGCC   |
| MIR173a   | 5p | 972574   | 972594 scaffold_8   | plus  | 972518   | 972804 mature1   | TAATATGGGTTGGAGTTGGGC   |
| MIR173b   | 5p | 972730   | 972750 scaffold_8   | minus | 972518   | 972805 mature1   | TAATATGGGTTGGAGTTGGGC   |
| MIR174    | 3p | 515656   | 515676 scaffold_44  | minus | 515628   | 515796 mature1   | TAATGCCAAAGGACGTGTGGC   |
| MIR175a   | 3p | 1815827  | 1815847 scaffold_13 | plus  | 1815684  | 1815876 mature1  | TACAGTCGAGTACGGCACTTC   |
| MIR175a*  | 5p | 1815718  | 1815736 scaffold_13 | plus  | 1815684  | 1815876 star1    | TGCCGCTACTCGACTGTACC    |
| MIR175b   | 3p | 1815714  | 1815734 scaffold_13 | minus | 1815684  | 1815876 mature1  | TACAGTCGAGTACGGCACTTC   |
| MIR175b*  | 5p | 1815825  | 1815843 scaffold_13 | minus | 1815684  | 1815876 star1    | TGCCGCTACTCGACTGTACC    |
| MIR176    | 5p | 646274   | 646296 scaffold_6   | minus | 646139   | 646300 mature1   | TACAGTCTCCCCCTCTGAAGCG  |
| MIR177    | 5p | 114085   | 114105 scaffold_49  | minus | 113928   | 114160 mature1   | TACCCAGGAATGTGTTGCTCA   |
| MIR178a   | 5p | 1420751  | 1420772 scaffold_26 | plus  | 1420750  | 1420919 mature1  | TACCGACCGTTTGGGGCCATT   |
| MIR178a*  | 3p | 1420883  | 1420904 scaffold_26 | plus  | 1420750  | 1420919 star1    | TGGGCCCCAAACGGTCGGTAAC  |
| MIR178aa  | 5p | 125131   | 125152 scaffold_15  | minus | 124943   | 125208 mature1   | TACCGACCGTTTGGGGCCATT   |
| MIR178aa* | 3p | 124998   | 125019 scaffold_15  | minus | 124943   | 125208 star1     | TGGGCCCCAAACGGTCGGTAAC  |
| MIR178ab  | 5p | 257016   | 257037 scaffold_47  | plus  | 256973   | 257190 mature1   | TACCGACCGTTTGGGGCCATT   |
| MIR178ab* | 3p | 257148   | 257169 scaffold_47  | plus  | 256973   | 257190 star1     | TGGGCCCCAAACGGTCGGTAAC  |
| MIR178ac  | 5p | 76066    | 76087 scaffold_95   | minus | 75912    | 76110 mature1    | TACCGACCGTTTGGGGCCATT   |
| MIR178ac* | 3p | 75934    | 75955 scaffold_95   | minus | 75912    | 76110 star1      | TGGGCCCCAAACGGTCGGTAAC  |
| MIR178ad  | 5p | 1996409  | 1996430 scaffold_14 | minus | 1996255  | 1996453 mature1  | TACCGACCGTTTGGGGCCATT   |
| MIR178ad* | 3p | 1996277  | 1996298 scaffold_14 | minus | 1996255  | 1996453 star1    | TGGGCCCCAAACGGTCGGTAAC  |
| MIR178ae  | 5p | 8480     | 8501 scaffold_141   | plus  | 8454     | 8640 mature1     | TACCGACCGTTTGGGGCCATT   |
| MIR178ae* | 3p | 8596     | 8617 scaffold_141   | plus  | 8454     | 8640 star1       | TGGGCCCCAAACGGTCGGTAAC  |
| MIR178af  | 5p | 11645    | 11666 scaffold_115  | plus  | 11621    | 11803 mature1    | TACCGACCGTTTGGGGCCATT   |
| MIR178af* | 3p | 11761    | 11782 scaffold_115  | plus  | 11621    | 11803 star1      | TGGGCCCCAAACGGTCGGTAAC  |
| MIR178ag  | 5p | 452131   | 452152 scaffold_31  | plus  | 452107   | 452305 mature1   | TACCGACCGTTTGGGGCCATT   |
| MIR178ag* | 3p | 452263   | 452284 scaffold_31  | plus  | 452107   | 452305 star1     | TGGGCCCCAAACGGTCGGTAAC  |
| MIR178ah  | 5p | 1996279  | 1996300 scaffold_14 | plus  | 1996255  | 1996453 mature1  | TACCGACCGTTTGGGGCCATT   |
| MIR178ah* | 3p | 1996411  | 1996432 scaffold_14 | plus  | 1996255  | 1996453 star1    | TGGGCCCCAAACGGTCGGTAAC  |
| MIR178ai  | 5p | 692129   | 692150 scaffold_31  | minus | 691973   | 692175 mature1   | TACCGACCGTTTGGGGCCATT   |
| MIR178ai* | 3p | 691997   | 692018 scaffold_31  | minus | 691973   | 692175 star1     | TGGGCCCCAAACGGTCGGTAAC  |
| MIR178aj  | 5p | 2823600  | 2823621 scaffold_14 | minus | 2823446  | 2823644 mature1  | TACCGACCGTTTGGGGCCATT   |
| MIR178aj* | 3p | 2823468  | 2823489 scaffold_14 | minus | 2823446  | 2823644 star1    | TGGGCCCCAAACGGTCGGTAAC  |
| MIR178ak  | 5p | 2215802  | 2215823 scaffold_20 | minus | 2215648  | 2215846 mature1  | TACCGACCGTTTGGGGCCATT   |
| MIR178ak* | 3p | 2215670  | 2215691 scaffold_20 | minus | 2215648  | 2215846 star1    | TGGGCCCCAAACGGTCGGTAAC  |
| MIR178al  | 5p | 340368   | 340389 scaffold_62  | minus | 340214   | 340412 mature1   | TACCGACCGTTTGGGGCCATT   |
| MIR178al* | 3p | 340236   | 340257 scaffold_62  | minus | 340214   | 340412 star1     | TGGGCCCCAAATGGTCGGTAAC  |
| MIR178am  | 5p | 98374    | 98395 scaffold_42   | plus  | 98367    | 98531 mature1    | TACCGACCGTTTGGGGCCATT   |
| MIR178am* | 3p | 98506    | 98527 scaffold_42   | plus  | 98367    | 98531 star1      | TGGGCCCCAAACGGTCGGTAAC  |
| MIR178an  | 5p | 117275   | 117296 scaffold_84  | minus | 117121   | 117319 mature1   | TACCGACCGTTTGGGGCCATT   |
| MIR178an* | 3p | 117143   | 117164 scaffold_84  | minus | 117121   | 117319 star1     | TGAGCCCCAAACGGTCGGTAAC  |
| MIR178ao  | 5p | 2924148  | 2924169 scaffold_11 | plus  | 2924122  | 2924325 mature1  | TACCGACCGTTTGGGGCCATT   |
| MIR178ao* | 3p | 2924281  | 2924302 scaffold_11 | plus  | 2924122  | 2924325 star1    | TGGGCCCCAAACGGTCGGTAAC  |
| MIR178ap  | 5p | 21956    | 21977 scaffold_95   | minus | 21818    | 22000 mature1    | TACCGACCGTTTGGGGCCATT   |
| MIR178aq  | 5p | 2513212  | 2513233 scaffold_11 | minus | 2513058  | 2513256 mature1  | TACCGACCGTTTGGGGCCATT   |
| MIR178aq* | 3p | 2513080  | 2513101 scaffold_11 | minus | 2513058  | 2513256 star1    | TGGGCCCCAAACGGTCGGTAAC  |
| MIR178ar  | 5p | 68124    | 68145 scaffold_100  | minus | 67970    | 68168 mature1    | TACCGACCGTTTGGGGCCATT   |
| MIR178ar* | 3p | 67992    | 68013 scaffold_100  | minus | 67970    | 68168 star1      | TGGGCCCCAAACGGTCGGTAAC  |
| MIR178as  | 5p | 8594     | 8615 scaffold_141   | minus | 8437     | 8640 mature1     | TACCGACCGTTTGGGGCCATT   |
| MIR178as* | 3p | 8478     | 8499 scaffold_141   | minus | 8437     | 8640 star1       | TGGGCCCCAAACGGTCGGTAAC  |
| MIR178at  | 5p | 103309   | 103330 scaffold_14  | minus | 103105   | 103404 mature1   | TACCGACCGTTTGGGGCCATT   |
| MIR178at* | 3p | 103178   | 103199 scaffold_14  | minus | 103105   | 103404 star1     | TGGGCCCCAAACGGTCGGTAAC  |
| MIR178au  | 5p | 125000   | 125021 scaffold_15  | plus  | 124912   | 125239 mature1   | TACCGACCGTTTGGGGCCATT   |
| MIR178au* | 3p | 125133   | 125154 scaffold_15  | plus  | 124912   | 125239 star1     | TGGGCCCCAAACGGTCGGTAAC  |
| MIR178b   | 5p | 218352   | 218373 scaffold_60  | minus | 218198   | 218396 mature1   | TACCGACCGTTTGGGGCCATT   |
| MIR178b*  | 3p | 218220   | 218241 scaffold_60  | minus | 218198   | 218396 star1     | TGGGCCCCAAACGGTCGGTAAC  |
| MIR178c   | 5p | 411377   | 411398 scaffold_31  | plus  | 411353   | 411535 mature1   | TACCGACCGTTTGGGGCCATT   |
| MIR178c*  | 3p | 411493   | 411514 scaffold_31  | plus  | 411353   | 411535 star1     | TGGGCCCCAAACGGTCGGTAAC  |
| MIR178d   | 5p | 568536   | 568557 scaffold_27  | minus | 568379   | 568580 mature1   | TACCGACCGTTTGGGGCCATT   |
| MIR178d*  | 3p | 568420   | 568441 scaffold_27  | minus | 568379   | 568580 star1     | TGGGCCCCAAACGGTCGGTAAC  |
| MIR178e   | 5p | 86816    | 86837 scaffold_5    | minus | 86659    | 86860 mature1    | TACCGACCGTTTGGGGCCATT   |
| MIR178e*  | 3p | 86700    | 86721 scaffold_5    | minus | 86659    | 86860 star1      | TGGGCCCCAAACGGTCGGTAAC  |
| MIR178f   | 5p | 1036211  | 1036232 scaffold_11 | minus | 1036057  | 1036255 mature1  | TACCGACCGTTTGGGGCCATT   |
| MIR178f*  | 3p | 1036079  | 1036100 scaffold_11 | minus | 1036057  | 1036255 star1    | TGGGCCCCAAACAGTCGGTAAC  |
| MIR178g   | 5p | 691999   | 692020 scaffold_31  | plus  | 691973   | 692175 mature1   | TACCGACCGTTTGGGGCCATT   |
| MIR178g*  | 3p | 692131   | 692152 scaffold_31  | plus  | 691973   | 692175 star1     | TGGGCCCCAAACGGTCGGTAAC  |
| MIR178h   | 5p | 67994    | 68015 scaffold_100  | plus  | 67970    | 68168 mature1    | TACCGACCGTTTGGGGCCATT   |
| MIR178h*  | 3p | 68126    | 68147 scaffold_100  | plus  | 67970    | 68168 star1      | TGGGCCCCAAACGGTCGGTAAC  |
| MIR178i   | 5p | 411491   | 411512 scaffold_31  | minus | 411353   | 411535 mature1   | TACCGACCGTTTGGGGCCATT   |
| MIR178i*  | 3p | 411375   | 411396 scaffold_31  | minus | 411353   | 411535 star1     | TGGGCCCCAAACGGTCGGTAAC  |
| MIR178j   | 5p | 86702    | 86723 scaffold_5    | plus  | 86659    | 86860 mature1    | TACCGACCGTTTGGGGCCATT   |
| MIR178j*  | 3p | 86818    | 86839 scaffold_5    | plus  | 86659    | 86860 star1      | TGGGCCCCAAACGGTCGGTAAC  |
| MIR178k   | 5p | 568422   | 568443 scaffold_27  | plus  | 568398   | 568580 mature1   | TACCGACCGTTTGGGGCCATT   |
| MIR178k*  | 3p | 568538   | 568559 scaffold_27  | plus  | 568398   | 568580 star1     | TGGGCCCCAAACGGTCGGTAAC  |

|          |    |         |                     |       |         |                 |                           |
|----------|----|---------|---------------------|-------|---------|-----------------|---------------------------|
| MIR178l  | 5p | 218222  | 218243 scaffold_60  | plus  | 218198  | 218396 mature1  | TACCGACCGTTTGGGGCCATT     |
| MIR178l* | 3p | 218354  | 218375 scaffold_60  | plus  | 218198  | 218396 star1    | TGGGCCCCAAACGGTCGGTAAC    |
| MIR178m  | 5p | 84935   | 84956 scaffold_47   | minus | 84781   | 84979 mature1   | TACCGACCGTTTGGGGCCATT     |
| MIR178n  | 5p | 75936   | 75957 scaffold_95   | plus  | 75912   | 76110 mature1   | TACCGACCGTTTGGGGCCATT     |
| MIR178n* | 3p | 76068   | 76089 scaffold_95   | plus  | 75912   | 76110 star1     | TGGGCCCCAAACGGTCGGTAAC    |
| MIR178o  | 5p | 2924279 | 2924300 scaffold_11 | minus | 2924105 | 2924325 mature1 | TACCGACCGTTTGGGGCCATT     |
| MIR178o* | 3p | 2924146 | 2924167 scaffold_11 | minus | 2924105 | 2924325 star1   | TGGGCCCCAAACGGTCGGTAAC    |
| MIR178p  | 5p | 2215672 | 2215693 scaffold_20 | plus  | 2215648 | 2215847 mature1 | TACCGACCGTTTGGGGCCATT     |
| MIR178p* | 3p | 2215804 | 2215825 scaffold_20 | plus  | 2215648 | 2215847 star1   | TGGGCCCCAAACGGTCGGTAAC    |
| MIR178q  | 5p | 98504   | 98525 scaffold_42   | minus | 98365   | 98533 mature1   | TACCGACCGTTTGGGGCCATT     |
| MIR178q* | 3p | 98372   | 98393 scaffold_42   | minus | 98365   | 98533 star1     | TGGGCCCCAAACGGTCGGTAAC    |
| MIR178r  | 5p | 486016  | 486037 scaffold_53  | minus | 485815  | 486046 mature1  | TACCGACCGTTTGGGGCCATT     |
| MIR178s  | 5p | 255521  | 255542 scaffold_68  | plus  | 255497  | 255695 mature1  | TACCGACCGTTTGGGGCCATT     |
| MIR178s* | 3p | 255653  | 255674 scaffold_68  | plus  | 255497  | 255695 star1    | TGAGCCCCAAACGGTCGGTAAC    |
| MIR178t  | 5p | 452261  | 452282 scaffold_31  | minus | 452107  | 452305 mature1  | TACCGACCGTTTGGGGCCATT     |
| MIR178t* | 3p | 452129  | 452150 scaffold_31  | minus | 452107  | 452305 star1    | TGGGCCCCAAACGGTCGGTAAC    |
| MIR178u  | 5p | 3120029 | 3120050 scaffold_1  | plus  | 3120005 | 3120203 mature1 | TACCGACCGTTTGGGGCCATT     |
| MIR178u* | 3p | 3120161 | 3120182 scaffold_1  | plus  | 3120005 | 3120203 star1   | TGAGCCCCAAACGGTCGGTAAC    |
| MIR178v  | 5p | 28980   | 29001 scaffold_95   | plus  | 28956   | 29154 mature1   | TACCGACCGTTTGGGGCCATT     |
| MIR178v* | 3p | 29112   | 29133 scaffold_95   | plus  | 28956   | 29154 star1     | TGAGCCCCAAACGGTCGGTAAC    |
| MIR178w  | 5p | 2823470 | 2823491 scaffold_14 | plus  | 2823446 | 2823644 mature1 | TACCGACCGTTTGGGGCCATT     |
| MIR178w* | 3p | 2823602 | 2823623 scaffold_14 | plus  | 2823446 | 2823644 star1   | TGGGCCCCAAACGGTCGGTAAC    |
| MIR178x  | 5p | 257146  | 257167 scaffold_47  | minus | 256992  | 257190 mature1  | TACCGACCGTTTGGGGCCATT     |
| MIR178x* | 3p | 257014  | 257035 scaffold_47  | minus | 256992  | 257190 star1    | TGGGCCCCAAACGGTCGGTAAC    |
| MIR178y  | 5p | 117259  | 117280 scaffold_23  | minus | 117104  | 117303 mature1  | TACCGACCGTTTGGGGCCATT     |
| MIR178y* | 3p | 117127  | 117148 scaffold_23  | minus | 117104  | 117303 star1    | TGGTCCCCAAACGGTCGGTAAC    |
| MIR178z  | 5p | 11759   | 11780 scaffold_115  | minus | 11621   | 11803 mature1   | TACCGACCGTTTGGGGCCATT     |
| MIR178z* | 3p | 11643   | 11664 scaffold_115  | minus | 11621   | 11803 star1     | TGGGCCCCAAACGGTCGGTAAC    |
| MIR179a  | 5p | 37219   | 37240 scaffold_72   | minus | 37065   | 37263 mature1   | TACCGACCGTTTGGGGCCATT     |
| MIR180   | 3p | 1960101 | 1960123 scaffold_11 | minus | 1960030 | 1960325 mature1 | TACCGATCCATCCTAAGATGAGA   |
| MIR181   | 5p | 4061796 | 4061817 scaffold_1  | plus  | 4061756 | 4062016 mature1 | TACCGATCCTTCTGGTCTAG      |
| MIR182   | 5p | 46259   | 46279 scaffold_86   | minus | 46134   | 46314 mature1   | TACCGATTACTGGGACGGT       |
| MIR183   | 3p | 1547438 | 1547458 scaffold_18 | plus  | 1547226 | 1547549 mature2 | TACCGCTGGACAGCATCTCGT     |
| MIR184   | 5p | 278395  | 278416 scaffold_63  | plus  | 278359  | 278625 mature2  | TACCGAAGACAGAAATAGACC     |
| MIR185a  | 3p | 1356152 | 1356174 scaffold_18 | minus | 1356052 | 1356368 mature2 | TACGGGTGTACGGATGGAGGAGC   |
| MIR185a* | 3p | 1356151 | 1356173 scaffold_18 | minus | 1356052 | 1356368 star2   | ACGGGTGTACGGATGGAGGAGCT   |
| MIR185b  | 3p | 1356247 | 1356269 scaffold_18 | plus  | 1356052 | 1356368 mature2 | TACGGGTGTACGGATGGAGGAGC   |
| MIR186   | 3p | 71874   | 71894 scaffold_24   | minus | 71871   | 72120 mature1   | TACGTCATCCATCGCCCTGTA     |
| MIR186*  | 5p | 72088   | 72107 scaffold_24   | minus | 71871   | 72120 star1     | TGGATGACGTACACAACAAGG     |
| MIR187   | 5p | 6687    | 6707 scaffold_321   | minus | 6541    | 6736 mature2    | TACGCTACTCATCAATGAGCT     |
| MIR187*  | 3p | 6542    | 6565 scaffold_321   | minus | 6541    | 6736 star1      | TGGAAGCTGGGCTCTGGAGGCCATG |
| MIR188a  | 3p | 1091753 | 1091774 scaffold_25 | plus  | 1091660 | 1091795 mature1 | TACTGACCCGGTACGACTTGGGA   |
| MIR188b  | 3p | 64438   | 64459 scaffold_68   | plus  | 64345   | 64480 mature1   | TACTGACCCGGTACGACTTGGGA   |
| MIR189   | 3p | 2393268 | 2393289 scaffold_16 | minus | 2393261 | 2393390 mature1 | TACTGGTTCGCTACTGGGTCGC    |
| MIR190   | 5p | 116303  | 116323 scaffold_12  | minus | 115981  | 116328 mature1  | TAGAAAGGGGATTAGTGCACC     |
| MIR190*  | 3p | 115983  | 116004 scaffold_12  | minus | 115981  | 116328 star1    | TGCACTAATCCCTTTCTACCC     |
| MIR191a  | 5p | 2206742 | 2206763 scaffold_8  | plus  | 2206685 | 2206889 mature1 | TAGACGAGGAACCTGCCGAAGC    |
| MIR191a* | 3p | 2206838 | 2206859 scaffold_8  | plus  | 2206685 | 2206889 star1   | TTCGGCAAGTTCCTCGTCTAGT    |
| MIR191b  | 5p | 2206836 | 2206857 scaffold_8  | minus | 2206685 | 2206890 mature1 | TAGACGAGGAACCTGCCGAAGC    |
| MIR191b* | 3p | 2206740 | 2206761 scaffold_8  | minus | 2206685 | 2206890 star1   | TTCGGCAAGTTCCTCGTCTAGT    |
| MIR192   | 3p | 709607  | 709629 scaffold_12  | plus  | 709380  | 709663 mature2  | TAGACTTTTAGTCGGCTGCATCT   |
| MIR193a  | 5p | 169407  | 169428 scaffold_84  | plus  | 169364  | 169612 mature1  | TAGCAACTGGACTAGTTACTCC    |
| MIR193a* | 3p | 169560  | 169581 scaffold_84  | plus  | 169364  | 169612 star1    | TAGTCCAGTTGCTAGGGGGGGG    |
| MIR193b  | 5p | 1699962 | 1699983 scaffold_26 | plus  | 1699922 | 1700209 mature1 | TAGCAACTGGACTAGTTACTCC    |
| MIR193b* | 3p | 1700159 | 1700180 scaffold_26 | plus  | 1699922 | 1700209 star1   | TAGTCCAGTTGCTAGGGGGGGG    |
| MIR193c  | 5p | 84353   | 84374 scaffold_69   | plus  | 84313   | 84590 mature1   | TAGCAACTGGACTAGTTACTCC    |
| MIR193c* | 3p | 84539   | 84560 scaffold_69   | plus  | 84313   | 84590 star1     | TAGTCCAGTTGCTAGGGGGGGG    |
| MIR194   | 5p | 176368  | 176389 scaffold_40  | plus  | 176345  | 176593 mature2  | TAGCCCGCTCACTGCCGTATT     |
| MIR195   | 3p | 123893  | 123913 scaffold_51  | minus | 123877  | 124081 mature1  | TAGCGATGAGAGAAAGAGGC      |
| MIR195*  | 5p | 124042  | 124063 scaffold_51  | minus | 123877  | 124081 star1    | TCTTCTCTCATCGCTACAGC      |
| MIR196a  | 3p | 1356130 | 1356151 scaffold_18 | minus | 1356052 | 1356368 mature1 | TAGGACTCGGACTGCATGAAC     |
| MIR196a* | 5p | 1356268 | 1356289 scaffold_18 | minus | 1356052 | 1356368 star1   | TCATGCAGTCCCAGTCTTAGC     |
| MIR196b  | 3p | 1356270 | 1356291 scaffold_18 | plus  | 1356052 | 1356368 mature1 | TAGGACTCGGACTGCATGAAC     |
| MIR196b* | 5p | 1356132 | 1356153 scaffold_18 | plus  | 1356052 | 1356368 star1   | TCATGCAGTCCCAGTCTTAGC     |
| MIR197a  | 3p | 20807   | 20829 scaffold_73   | minus | 20762   | 20908 mature1   | TAGGGTGACTGGATGAGGGTGCC   |
| MIR197a* | 3p | 20795   | 20814 scaffold_73   | minus | 20762   | 20908 star1     | AGGGTGCCCGGAAATACCCG      |
| MIR197b  | 3p | 1244603 | 1244625 scaffold_13 | minus | 1244562 | 1244720 mature1 | TAGGGTGACTGGATGAGGGTGCC   |
| MIR198   | 5p | 1276796 | 1276816 scaffold_23 | minus | 1276735 | 1276850 mature1 | TAGGGTTAATGTAGGTGCGGG     |
| MIR199   | 5p | 226344  | 226365 scaffold_20  | plus  | 226331  | 226446 mature1  | TAGGTTAGGCACTACTGGTAGA    |
| MIR200   | 3p | 531757  | 531778 scaffold_43  | minus | 531715  | 531910 mature1  | TAGTACGCGTGCACTCGTTAGG    |
| MIR200*  | 3p | 531851  | 531871 scaffold_43  | plus  | 531715  | 531910 star1    | TAACGAATGCACGCGTACTAT     |
| MIR201   | 3p | 7202339 | 7202361 scaffold_1  | minus | 7202286 | 7202667 mature1 | TAGTAGACGAGAACGCCTCAGG    |
| MIR201*  | 5p | 7202590 | 7202612 scaffold_1  | minus | 7202286 | 7202667 star1   | TGAGTGCGTTCTCGTCTACTACG   |
| MIR202   | 3p | 199862  | 199882 scaffold_16  | minus | 199852  | 200113 mature1  | TAGTCAGGTCGCGCGCGGCA      |
| MIR202*  | 3p | 985651  | 985672 scaffold_16  | minus | 985594  | 985886 star1    | TGCATGTCTTGATCCGCGCAGG    |
| MIR203a  | 3p | 284173  | 284194 scaffold_69  | plus  | 284024  | 284225 mature1  | TAGTCCAGTTGCTAGGGGGGGG    |
| MIR203a* | 5p | 284061  | 284083 scaffold_69  | plus  | 284024  | 284225 star1    | CCCTTAGAAACTGGACTAGTAGC   |

|          |    |         |                     |       |         |                 |                         |
|----------|----|---------|---------------------|-------|---------|-----------------|-------------------------|
| MIR204   | 5p | 1969966 | 1969988 scaffold_12 | plus  | 1969908 | 1970111 mature1 | TAGTCTCCGCCTGGCTGTTCACT |
| MIR204*  | 3p | 1970053 | 1970072 scaffold_12 | plus  | 1969908 | 1970111 star1   | TGAACAGCCAGGCGGAGACT    |
| MIR205   | 5p | 1842371 | 1842392 scaffold_22 | plus  | 1842233 | 1842611 mature1 | TAGTTTATAACATTGGGTCGCC  |
| MIR206   | 5p | 1597988 | 1598008 scaffold_24 | minus | 1597782 | 1598074 mature2 | TATACAAAACGCACAGACAGA   |
| MIR207   | 5p | 518665  | 518686 scaffold_25  | minus | 518459  | 518711 mature1  | TATACCGACCGCGGATGCAGA   |
| MIR207*  | 3p | 518483  | 518504 scaffold_25  | minus | 518459  | 518711 star1    | TGCATCCGCCGGTCGGTGTACT  |
| MIR208   | 5p | 104832  | 104854 scaffold_78  | plus  | 104774  | 105084 mature2  | TATATAGTAAACTCTTGAAAGG  |
| MIR209   | 3p | 1547334 | 1547353 scaffold_18 | minus | 1547266 | 1547511 mature1 | TATCGCTGGACAGCATCTCG    |
| MIR210   | 3p | 964507  | 964528 scaffold_26  | minus | 964491  | 964684 mature1  | TATCTCTGTAGAACAAAGCA    |
| MIR210*  | 3p | 964550  | 964573 scaffold_26  | minus | 964491  | 964684 star1    | TCAGCTTGTCTGGATAACCTGCC |
| MIR211a  | 5p | 1994393 | 1994414 scaffold_20 | plus  | 1994272 | 1994615 mature1 | TATCTTCGTAGGCCATGAAGGC  |
| MIR211b  | 5p | 63785   | 63806 scaffold_85   | minus | 63583   | 63928 mature1   | TATCTTCGTAGGCCATGAAGGC  |
| MIR212a  | 5p | 120457  | 120477 scaffold_58  | plus  | 120407  | 120575 mature1  | TATGGATGTGTGTGAGATGCC   |
| MIR212a* | 3p | 120503  | 120524 scaffold_58  | plus  | 120407  | 120575 star1    | TATGTCGCCACGTTTCTGGATG  |
| MIR212b  | 5p | 52159   | 52179 scaffold_78   | plus  | 52109   | 52277 mature1   | TATGGATGTGTGTGAGATGCC   |
| MIR212b* | 3p | 52205   | 52226 scaffold_78   | plus  | 52109   | 52277 star1     | TATGTCGCCACGTTTCTGGATG  |
| MIR212c  | 5p | 1067343 | 1067363 scaffold_15 | plus  | 1067293 | 1067461 mature1 | TATGGATGTGTGTGAGATGCC   |
| MIR212c* | 3p | 1067389 | 1067410 scaffold_15 | plus  | 1067293 | 1067461 star1   | TATGTCGCCACGTTTCTGGATG  |
| MIR213   | 3p | 1226993 | 1227015 scaffold_27 | plus  | 1226679 | 1227017 mature2 | TATGGTGCCTTCTCGTGAACCTC |
| MIR214   | 5p | 193210  | 193229 scaffold_12  | plus  | 193142  | 193502 mature1  | TATGGTTGAGAGTAGATAGG    |
| MIR214*  | 3p | 193401  | 193422 scaffold_12  | plus  | 193142  | 193502 star1    | TCCTATCTACTCTCAACCACAA  |
| MIR215   | 5p | 1377999 | 1378020 scaffold_6  | plus  | 1377942 | 1378255 mature1 | TATTCCCGAACCAACACTGACG  |
| MIR216   | 3p | 208213  | 208234 scaffold_60  | plus  | 207940  | 208287 mature1  | TATTCCGAAGTCTGCAACTGC   |
| MIR217   | 5p | 1464555 | 1464574 scaffold_23 | plus  | 1464526 | 1464786 mature1 | TATTGTGGGCGGTACTGA      |
| MIR217*  | 3p | 1464740 | 1464760 scaffold_23 | plus  | 1464526 | 1464786 star1   | TCAGTACACCGCCACAATAG    |
| MIR218a  | 3p | 3336868 | 3336890 scaffold_4  | minus | 3336856 | 3337037 mature1 | TATTACAGCGTCGCATCATT    |
| MIR218b  | 3p | 124488  | 124510 scaffold_86  | minus | 124478  | 124649 mature1  | TATTTACAGCGTCGCATCATT   |
| MIR219   | 3p | 278549  | 278570 scaffold_63  | plus  | 278359  | 278625 mature1  | TATTTGTGGTTTCGGGAACGGG  |
| MIR220   | 3p | 3069987 | 3070008 scaffold_13 | plus  | 3069817 | 3070075 mature1 | TCAACTAACCCACCTTACCGGGG |
| MIR220*  | 5p | 3069877 | 3069898 scaffold_13 | plus  | 3069817 | 3070075 star1   | CCGGTAAGGTGGTTAATTGAAG  |
| MIR221   | 3p | 237456  | 237475 scaffold_47  | plus  | 237389  | 237493 mature1  | TCAAGACCTGTCCACCATG     |
| MIR222a  | 5p | 1278084 | 1278104 scaffold_8  | minus | 1277838 | 1278126 mature1 | TCAAGGCCAGACTGAAGACC    |
| MIR222a* | 3p | 1277904 | 1277924 scaffold_8  | minus | 1277838 | 1278126 star1   | TCAGTCTGGGCTTGAAGCGG    |
| MIR222b  | 5p | 1277909 | 1277929 scaffold_8  | plus  | 1277854 | 1278157 mature1 | TCAAGGCCAGACTGAAGACC    |
| MIR222b* | 3p | 1278088 | 1278109 scaffold_8  | plus  | 1277854 | 1278157 star1   | TTCAGTCTGGGCTTGAAGCGG   |
| MIR223   | 5p | 176390  | 176410 scaffold_40  | plus  | 176345  | 176593 mature1  | TCAAGTGTTCGCGAATGTTGC   |
| MIR224   | 5p | 235621  | 235641 scaffold_61  | minus | 235413  | 235674 mature1  | TCAAGTTCTCTGCAGTCATCA   |
| MIR225   | 3p | 1121323 | 1121344 scaffold_6  | minus | 1121305 | 1121548 mature1 | TCACAGCCAGCGGAGAGATCGT  |
| MIR225*  | 5p | 1121526 | 1121547 scaffold_6  | minus | 1121305 | 1121548 star1   | TGCATTGCGATCTCTCCGCTGG  |
| MIR226a  | 5p | 3025801 | 3025822 scaffold_1  | minus | 3025659 | 3025871 mature1 | TCACCTCCGGATCAGCACGTGC  |
| MIR226a* | 3p | 3025686 | 3025706 scaffold_1  | minus | 3025659 | 3025871 star1   | TGCTGTGCCCTCACCTCCGGG   |
| MIR226b  | 5p | 12165   | 12186 scaffold_3    | minus | 12023   | 12235 mature1   | TCACCTCCGGATCAGCACGTGC  |
| MIR226b* | 3p | 12050   | 12070 scaffold_3    | minus | 12023   | 12235 star1     | TGCTGTGCCCTCACCTCCGGG   |
| MIR226c  | 3p | 102605  | 102626 scaffold_81  | plus  | 102299  | 102640 mature1  | TCACCTCCGGATCAGCACGTGC  |
| MIR227a  | 5p | 1074853 | 1074874 scaffold_23 | plus  | 1074837 | 1074982 mature1 | TCACCTGCCACTGTGGCCTGG   |
| MIR227a* | 3p | 1074906 | 1074925 scaffold_23 | plus  | 1074837 | 1074982 star1   | TGCTGTGGGCGAGTGTCTGC    |
| MIR227b  | 5p | 659427  | 659448 scaffold_31  | minus | 659319  | 659472 mature1  | TCACCTGCCACTGTGGCCTGG   |
| MIR227b* | 3p | 659376  | 659396 scaffold_31  | minus | 659319  | 659472 star1    | TTGCTGTGGGCGAGTGTCTGC   |
| MIR227c  | 3p | 2129209 | 2129230 scaffold_12 | plus  | 2129193 | 2129338 mature1 | TCACCTGCCACTGTGGCCTGG   |
| MIR227c* | 3p | 2129261 | 2129281 scaffold_12 | plus  | 2129193 | 2129338 star1   | TTGCTGTGGGCGAGTGTCTGC   |
| MIR227d  | 5p | 2794752 | 2794773 scaffold_1  | plus  | 2794736 | 2794881 mature1 | TCACCTGCCACTGTGGCCTGG   |
| MIR227d* | 3p | 2794803 | 2794823 scaffold_1  | plus  | 2794736 | 2794881 star1   | TTTCTGTGGGCGAGTGTCTGC   |
| MIR228   | 5p | 390694  | 390715 scaffold_66  | minus | 390626  | 390733 mature1  | TCCAGCGCGTGCATACGAGGG   |
| MIR228*  | 3p | 390665  | 390685 scaffold_66  | minus | 390626  | 390733 star1    | CGTTTGAGGGGCTTGGTTGCG   |
| MIR229   | 5p | 1962932 | 1962951 scaffold_15 | plus  | 1962924 | 1963123 mature1 | TCAGAGGACACATGGAGT      |
| MIR230   | 3p | 199883  | 199903 scaffold_16  | minus | 199852  | 200113 mature2  | TCAGCTGTCTCGTGAATTGG    |
| MIR231   | 5p | 183133  | 183155 scaffold_21  | plus  | 183107  | 183328 mature1  | TCAGGGCTCTAGTCGAGTATGG  |
| MIR232   | 3p | 985834  | 985856 scaffold_16  | plus  | 985610  | 985871 mature2  | TCAGGGTGGGAGCTAGCTACTGG |
| MIR233a  | 3p | 538900  | 538921 scaffold_21  | minus | 538897  | 539004 mature1  | TCATCGTTCGCCGCTGGCAGCA  |
| MIR233b  | 3p | 2680874 | 2680895 scaffold_3  | plus  | 2680791 | 2680897 star1   | TCATCGTTCGCCGCTGGCAGCA  |
| MIR234   | 5p | 815551  | 815572 scaffold_39  | plus  | 815449  | 815678 mature1  | TCATCGTTCAGGTCGGTGTCTGG |
| MIR234*  | 5p | 815516  | 815536 scaffold_39  | plus  | 815449  | 815678 star1    | CACCGACAGGCTCCACAGTGG   |
| MIR235   | 5p | 1960103 | 1960125 scaffold_11 | plus  | 1960035 | 1960317 mature1 | TCATCTTAGGATGGATCGGTATT |
| MIR236   | 3p | 1988016 | 1988035 scaffold_14 | minus | 1987951 | 1988228 mature1 | TCATGTGGTTGACTGCCAGG    |
| MIR237   | 5p | 6708    | 6729 scaffold_321   | minus | 6541    | 6736 mature1    | TCCAGACCCAGCTTCCACTCCT  |
| MIR238   | 5p | 3737633 | 3737653 scaffold_7  | plus  | 3737624 | 3737967 mature1 | TCCAGGACCGGATGAATTCC    |
| MIR238*  | 3p | 3737945 | 3737965 scaffold_7  | plus  | 3737624 | 3737967 star1   | TCATCCGCGTCTGGAGAAAGC   |
| MIR239a  | 3p | 409139  | 409159 scaffold_43  | plus  | 409067  | 409161 mature1  | TCCATGAAGTCGGGCCTTTCA   |
| MIR239a* | 5p | 409073  | 409093 scaffold_43  | plus  | 409067  | 409161 star1    | AAGGCCGACTTCATGGATT     |
| MIR239b  | 3p | 409070  | 409090 scaffold_43  | plus  | 409067  | 409161 mature1  | TCCATGAAGTCGGGCCTTTCA   |
| MIR239b* | 5p | 409136  | 409156 scaffold_43  | minus | 409067  | 409161 star1    | AAGGCCGACTTCATGGATT     |
| MIR240a  | 3p | 150799  | 150820 scaffold_74  | plus  | 150694  | 150850 mature1  | TCCATGGCGCTCGTGACGGAGG  |
| MIR240a* | 5p | 150725  | 150746 scaffold_74  | plus  | 150694  | 150850 star1    | TCCGTACAGAGCGCCATGGACG  |
| MIR240b  | 3p | 150723  | 150744 scaffold_74  | minus | 150629  | 150848 mature1  | TCCATGGCGCTCGTGACGGAGG  |
| MIR240b* | 5p | 150797  | 150818 scaffold_74  | minus | 150629  | 150848 star1    | TCCGTACAGAGCGCCATGGACG  |
| MIR241   | 3p | 3920470 | 3920490 scaffold_1  | minus | 3920429 | 3920622 mature2 | TCCCGAATTATTGTAGCACGA   |
| MIR242   | 3p | 2678363 | 2678384 scaffold_4  | plus  | 2678192 | 2678429 mature1 | TCCCGACGATAGAAAAGGGCGG  |

|          |    |          |                     |       |          |                  |                          |
|----------|----|----------|---------------------|-------|----------|------------------|--------------------------|
| MIR242*  | 5p | 2678231  | 2678252 scaffold_4  | plus  | 2678192  | 2678429 star1    | TTGAACACGGCGCTTTTCTATC   |
| MIR243a  | 3p | 7263717  | 7263738 scaffold_1  | minus | 7263643  | 7263963 mature2  | TCCC GCCTTCTGCAAAACTGTC  |
| MIR243b  | 3p | 7263878  | 7263899 scaffold_1  | plus  | 7263655  | 7263960 mature2  | TCCC GCCTTCTGCAAAACTGTC  |
| MIR244   | 5p | 518643   | 518664 scaffold_25  | minus | 518459   | 518711 mature2   | TCCCGCGCTGTTGTATCTCGGA   |
| MIR244*  | 3p | 518505   | 518526 scaffold_25  | minus | 518459   | 518711 star2     | TCCAGGATACAACAACGGGATC   |
| MIR245   | 3p | 2074958  | 2074979 scaffold_26 | minus | 2074952  | 2075082 mature1  | TCCCTGCTATCGCCACTGCCGC   |
| MIR246a  | 3p | 194342   | 194362 scaffold_55  | minus | 194337   | 194402 mature1   | TCCGAAAGGCACTCGACTGTA    |
| MIR246a* | 5p | 194381   | 194401 scaffold_55  | minus | 194337   | 194402 star1     | TACAGTCGAGTGCCTTCGGA     |
| MIR246b  | 3p | 194381   | 194401 scaffold_55  | plus  | 194340   | 194407 mature1   | TCCGAAAGGCACTCGACTGTA    |
| MIR246b* | 5p | 194342   | 194362 scaffold_55  | plus  | 194340   | 194407 star1     | TACAGTCGAGTGCCTTCGGA     |
| MIR247   | 5p | 1450304  | 1450324 scaffold_20 | plus  | 1450285  | 1450626 mature3  | TCCGCAGGTAGATAATTTGT     |
| MIR247*  | 3p | 1450589  | 1450609 scaffold_20 | plus  | 1450285  | 1450626 star3    | CAAAATTATCTACCTGCGGAA    |
| MIR248   | 3p | 7263736  | 7263758 scaffold_1  | minus | 7263643  | 7263963 mature4  | TCCGTGATGGCTGAGAGACATCC  |
| MIR249   | 3p | 1290319  | 1290342 scaffold_27 | plus  | 1290035  | 1290357 mature1  | TCCTTGTCATCTTTCCTCGTCGCC |
| MIR249*  | 5p | 1290054  | 1290076 scaffold_27 | plus  | 1290035  | 1290357 star1    | TGACGAGAAAGATGACAAGGAAG  |
| MIR250   | 3p | 1326365  | 1326385 scaffold_2  | minus | 1326323  | 1326644 mature3  | TCGCGCTCCACTGGTGCAC      |
| MIR251a  | 5p | 1250678  | 1250698 scaffold_14 | plus  | 1250672  | 1250760 mature1  | TCGCGTAGAAGGCCGGGCTGG    |
| MIR251b  | 5p | 165437   | 165457 scaffold_76  | plus  | 165395   | 165519 mature1   | TCGCGTAGAAGGCCGGGCTGG    |
| MIR252   | 5p | 76316    | 76337 scaffold_21   | plus  | 76131    | 76523 mature1    | TCGCTACGGGGTCGCTACTGGG   |
| MIR253   | 3p | 12210    | 12231 scaffold_18   | minus | 12152    | 12423 mature1    | TCGGAGAGCCAGTCGAGAGCGC   |
| MIR253*  | 5p | 12340    | 12361 scaffold_18   | minus | 12152    | 12423 star1      | TGGCGCTCTCGACTGGCTCTCC   |
| MIR254   | 5p | 4800077  | 4800096 scaffold_2  | plus  | 4800060  | 4800185 mature1  | TCGGCGATGAGGGATGTGGC     |
| MIR255a  | 3p | 1396361  | 1396382 scaffold_18 | minus | 1396352  | 1396483 mature1  | TCGGCTGAAGCTCCAGTATTCA   |
| MIR255a* | 5p | 1396453  | 1396475 scaffold_18 | minus | 1396352  | 1396483 star1    | TGAGACCCAGAAGGCTGATCGGG  |
| MIR255b  | 3p | 1486489  | 1486510 scaffold_18 | minus | 1486480  | 1486611 mature1  | TCGGCTGAAGCTCCAGTATTCA   |
| MIR255b* | 5p | 1486581  | 1486603 scaffold_18 | minus | 1486480  | 1486611 star1    | TGAGACCCAGAAGGCTGATCGGG  |
| MIR256   | 3p | 653322   | 653342 scaffold_41  | plus  | 653085   | 653474 mature1   | TCGGGATTAAGGTGGCGCTGC    |
| MIR257a  | 5p | 137729   | 137749 scaffold_85  | minus | 137576   | 137786 mature1   | TCGGTCGTATATCGCTGTCC     |
| MIR257a* | 3p | 137611   | 137631 scaffold_85  | minus | 137576   | 137786 star1     | AGCAGCGGTACACGACCCCGT    |
| MIR257b  | 5p | 648      | 668 scaffold_48     | plus  | 626      | 818 mature1      | TCGGTCGTATATCGCTGTCC     |
| MIR257b* | 3p | 779      | 799 scaffold_48     | plus  | 626      | 818 star1        | AGCAGCGGTACACGACCCCGT    |
| MIR258   | 3p | 7263676  | 7263695 scaffold_1  | minus | 7263643  | 7263963 mature3  | TCGTAGTTCCTCGCTGTGAG     |
| MIR259   | 3p | 1547467  | 1547490 scaffold_18 | plus  | 1547226  | 1547549 mature1  | TCGTGACCGCGGGGAAGGGGAGGG |
| MIR259*  | 5p | 1547283  | 1547306 scaffold_18 | plus  | 1547226  | 1547549 star1    | CTCCCTTCCCGGCGCTCACGACC  |
| MIR260   | 3p | 944552   | 944573 scaffold_19  | minus | 944520   | 944655 mature2   | TCTAACGAGGCTGCGACGTACG   |
| MIR261   | 5p | 224461   | 224482 scaffold_4   | minus | 224234   | 224523 mature2   | TCTCGCGGGGAATGAAGGAAA    |
| MIR261*  | 3p | 224274   | 224295 scaffold_4   | minus | 224234   | 224523 star2     | TCCTTTGTTCCCGGCGAGAGG    |
| MIR262   | 3p | 578041   | 578062 scaffold_51  | plus  | 577972   | 578070 mature1   | TCTCTGCACTGGGCTGTGAGCT   |
| MIR263   | 5p | 7202610  | 7202630 scaffold_1  | minus | 7202286  | 7202667 mature2  | TCTGATGCCGGAGCTTCCTGA    |
| MIR264a  | 3p | 123214   | 123234 scaffold_97  | plus  | 123143   | 123241 mature1   | TCTGCACTGGGCTGTGAGCTT    |
| MIR264b  | 3p | 244844   | 244864 scaffold_74  | plus  | 244785   | 244871 mature1   | TCTGCACTGGGCTGTGAGCTT    |
| MIR264c  | 3p | 1552302  | 1552322 scaffold_31 | plus  | 1552231  | 1552329 mature1  | TCTGCACTGGGCTGTGAGCTT    |
| MIR264d  | 3p | 140867   | 140887 scaffold_93  | plus  | 140793   | 140894 mature1   | TCTGCACTGGGCTGTGAGCTT    |
| MIR264e  | 3p | 27617    | 27637 scaffold_64   | minus | 27609    | 27707 mature1    | TCTGCACTGGGCTGTGAGCTT    |
| MIR264f  | 3p | 39286    | 39306 scaffold_32   | minus | 39278    | 39376 mature1    | TCTGCACTGGGCTGTGAGCTT    |
| MIR264g  | 3p | 3611     | 3631 scaffold_53    | minus | 3603     | 3701 mature1     | TCTGCACTGGGCTGTGAGCTT    |
| MIR264h  | 3p | 123476   | 123496 scaffold_15  | minus | 123468   | 123554 mature1   | TCTGCACTGGGCTGTGAGCTT    |
| MIR264i  | 3p | 29417    | 29437 scaffold_8    | minus | 29409    | 29510 mature1    | TCTGCACTGGGCTGTGAGCTT    |
| MIR264j  | 3p | 992      | 1012 scaffold_82    | minus | 984      | 1082 mature1     | TCTGCACTGGGCTGTGAGCTT    |
| MIR264k  | 3p | 22653    | 22673 scaffold_71   | minus | 22645    | 22743 mature1    | TCTGCACTGGGCTGTGAGCTT    |
| MIR264l  | 3p | 83340    | 83360 scaffold_50   | minus | 83332    | 83430 mature1    | TCTGCACTGGGCTGTGAGCTT    |
| MIR265   | 5p | 132536   | 132557 scaffold_25  | minus | 132327   | 132630 mature2   | TCTGGATCGAGGATTTCCGAGC   |
| MIR265*  | 3p | 132398   | 132419 scaffold_25  | minus | 132327   | 132630 star2     | TCGGAATCCTCGATCCAGATG    |
| MIR266a  | 3p | 869238   | 869258 scaffold_41  | plus  | 869110   | 869261 mature1   | TCTTGGCGGGCGTACCTTGC     |
| MIR266b  | 3p | 231411   | 231431 scaffold_75  | plus  | 231255   | 231433 mature1   | TCTTGGCGGGCGTACCTTGC     |
| MIR267a  | 3p | 1864028  | 1864048 scaffold_24 | minus | 1864000  | 1864265 mature1  | TCTTGTCCCGAACCTTGTCTCT   |
| MIR267b  | 3p | 1864219  | 1864239 scaffold_24 | plus  | 1864016  | 1864252 mature1  | TCTTGTCCCGAACCTTGTCTCT   |
| MIR268   | 3p | 4647552  | 4647572 scaffold_2  | plus  | 4647404  | 4647580 mature1  | TCTTGTGGACGGGTGAGGACG    |
| MIR269   | 3p | 926999   | 927019 scaffold_24  | minus | 926962   | 927139 mature1   | TCCTTCAACATGCAGAATTGC    |
| MIR270   | 3p | 366842   | 366862 scaffold_67  | plus  | 366632   | 366889 mature2   | TGAAAATAAAGAGCAAGGCGC    |
| MIR271a  | 3p | 1256     | 1276 scaffold_17    | minus | 1225     | 1483 mature1     | TGAAAGTGAGGATCTATTGAA    |
| MIR271a* | 5p | 1431     | 1451 scaffold_17    | minus | 1225     | 1483 star1       | CAATAGATCCTCACTTTCAGC    |
| MIR271b  | 3p | 1433     | 1453 scaffold_17    | plus  | 1225     | 1483 mature2     | TGAAAGTGAGGATCTATTGAA    |
| MIR272   | 3p | 380056   | 380076 scaffold_8   | plus  | 379878   | 380156 mature1   | TGAAATAGAATGGACTCCGTT    |
| MIR273   | 5p | 3371151  | 3371172 scaffold_5  | plus  | 3371149  | 3371227 mature1  | TGAACGTGTGCAAGTCTGAGC    |
| MIR274   | 5p | 102720   | 102741 scaffold_91  | plus  | 102638   | 102990 mature1   | TGAACTCATCTTGTCTGCTGCC   |
| MIR274*  | 3p | 102919   | 102940 scaffold_91  | plus  | 102638   | 102990 star1     | TTGAAGGGCAGCAACAAGGATG   |
| MIR275   | 3p | 12985384 | 12985405 scaffold_1 | minus | 12985330 | 12985532 mature1 | TGAATGCGGAACAAGCAGCAGG   |
| MIR276   | 3p | 2708107  | 2708129 scaffold_3  | minus | 2707962  | 2708314 mature1  | TGACAAACCGGACTTTGTTCCGGG |
| MIR277   | 3p | 2666338  | 2666360 scaffold_14 | minus | 2666320  | 2666650 mature1  | TGACATCAACCTCTCTGCAGACG  |
| MIR278   | 5p | 231215   | 231236 scaffold_61  | plus  | 231205   | 231290 mature1   | TGACCCGGATGGGCTGCAGATC   |
| MIR279a  | 3p | 430322   | 430343 scaffold_40  | minus | 430258   | 430543 mature2   | TGACCTTCTTGCATCCCGCTGC   |
| MIR279b  | 3p | 430322   | 430343 scaffold_40  | minus | 430264   | 430542 mature2   | TGACCTTCTTGCATCCCGCTGC   |
| MIR280   | 3p | 3167846  | 3167870 scaffold_4  | minus | 3167787  | 3168030 mature1  | TGACGACAGTGGCAATGGTATGGC |
| MIR280*  | 5p | 3167951  | 3167972 scaffold_4  | minus | 3167787  | 3168030 star1    | CGCCATTGCCACTGTCCGCATC   |
| MIR281   | 3p | 1232     | 1255 scaffold_17    | minus | 1225     | 1483 mature2     | TGACGGTGATATGGATGATGAGGC |
| MIR281*  | 5p | 1410     | 1430 scaffold_17    | minus | 1225     | 1483 star2       | TTCAGACCACTCTGACTGATC    |

|          |    |         |                     |       |         |                 |                           |
|----------|----|---------|---------------------|-------|---------|-----------------|---------------------------|
| MIR282   | 3p | 733193  | 733212 scaffold_37  | plus  | 733003  | 733259 mature1  | TGACTGCGGAGAGCTTCGGA      |
| MIR283   | 3p | 124167  | 124189 scaffold_86  | plus  | 124095  | 124227 mature1  | TGAGAGGCCAGATCGCAGCATGA   |
| MIR283*  | 5p | 124140  | 124160 scaffold_86  | plus  | 124095  | 124227 star1    | CTTGACATCGGTCTCCTCACT     |
| MIR284   | 3p | 270825  | 270846 scaffold_51  | plus  | 270573  | 270864 mature2  | TGAGATTCTCGGCTGTAATTGA    |
| MIR284*  | 5p | 270598  | 270619 scaffold_51  | plus  | 270573  | 270864 star2?   | TACAGCCAAAGAAATTCATGGAC   |
| MIR285   | 5p | 696225  | 696246 scaffold_3   | minus | 696026  | 696274 mature1  | TGAGCGATCCCTGTAGTAACCC    |
| MIR285*  | 3p | 696049  | 696070 scaffold_3   | minus | 696026  | 696274 star1    | TACTACAGGGATCGCTTATGTT    |
| MIR286   | 3p | 3683373 | 3683393 scaffold_7  | plus  | 3683241 | 3683409 mature1 | TGAGCCGATGGGGCTAGTTGG     |
| MIR286*  | 5p | 3683262 | 3683284 scaffold_7  | plus  | 3683241 | 3683409 star1   | CAGCCCCACGGCTCATCCCGGC    |
| MIR287   | 5p | 4501983 | 4502003 scaffold_1  | plus  | 4501912 | 4502231 mature1 | TGAGGAGTGAGTCAGATATGG     |
| MIR288a  | 3p | 538384  | 538405 scaffold_26  | minus | 538343  | 538638 mature1  | TGAGGCTGTGTCCCGGGGGCGGT   |
| MIR288a* | 5p | 538610  | 538631 scaffold_26  | minus | 538343  | 538638 star1    | CGCCCCGGGACACAGCCTCAGG    |
| MIR288b  | 3p | 538612  | 538633 scaffold_26  | plus  | 538377  | 538638 mature1  | TGAGGCTGTGTCCCGGGGGCGGT   |
| MIR288b* | 5p | 538386  | 538407 scaffold_26  | plus  | 538377  | 538638 star1    | CGCCCCGGGACACAGCCTCAGG    |
| MIR289   | 5p | 682492  | 682512 scaffold_13  | plus  | 682490  | 682588 mature1  | TGAGGTATAGCTGTGGCTGAC     |
| MIR290a  | 5p | 3115057 | 3115078 scaffold_1  | plus  | 3114929 | 3115354 mature1 | TGATGAACCTTGCTTCTTACT     |
| MIR290a* | 3p | 3115215 | 3115236 scaffold_1  | plus  | 3114929 | 3115354 star1   | TAAAGCAAGCAAGTTCATCAGG    |
| MIR290b  | 5p | 3115213 | 3115234 scaffold_1  | minus | 3114930 | 3115354 mature1 | TGATGAACCTTGCTTCTTACT     |
| MIR290b* | 3p | 3115055 | 3115076 scaffold_1  | minus | 3114930 | 3115354 star1   | TAAAGCAAGCAAGTTCATCAGG    |
| MIR291   | 3p | 1403    | 1424 scaffold_17    | plus  | 1225    | 1483 mature1    | TGATGATGATCAGTCAGAGTGG    |
| MIR292   | 3p | 142492  | 142513 scaffold_70  | plus  | 142284  | 142548 mature1  | TGCAACACACCCTGCCCGCCA     |
| MIR292*  | 5p | 142318  | 142340 scaffold_70  | plus  | 142284  | 142548 star1    | TATGGCGGGCAGGGTGTGTTTGC   |
| MIR293   | 3p | 199139  | 199160 scaffold_62  | minus | 199106  | 199353 mature1  | TGCAACTCGCTTCTTGGGAAGA    |
| MIR293*  | 5p | 199297  | 199318 scaffold_62  | minus | 199106  | 199353 star1    | TGCCCTAAGAAACAGATGCAGA    |
| MIR294   | 5p | 833432  | 833456 scaffold_38  | minus | 833302  | 833462 mature1  | TGCAAGACTGGGCGTTGAAACGGC  |
| MIR295   | 5p | 122460  | 122480 scaffold_49  | plus  | 122432  | 122585 mature1  | TGCACGACGATGCCAGGACG      |
| MIR296   | 5p | 775647  | 775668 scaffold_12  | plus  | 775621  | 775776 mature1  | TGCAGCACGGATGACGAAGACA    |
| MIR296*  | 3p | 775729  | 775750 scaffold_12  | plus  | 775621  | 775776 star1    | TCTTCATCATCCTGCTGCAGT     |
| MIR297   | 5p | 1039895 | 1039916 scaffold_4  | plus  | 1039891 | 1040201 mature1 | TGCAGCCTGATCAAGACGAAGG    |
| MIR297*  | 3p | 1040181 | 1040200 scaffold_4  | plus  | 1039891 | 1040201 star1   | TTCGTCTGATCAGGCTGCA       |
| MIR298   | 3p | 2140197 | 2140220 scaffold_18 | plus  | 2140009 | 2140261 mature1 | TGCAGGAGTGTGCTGTTGACCGGC  |
| MIR298*  | 5p | 2140053 | 2140076 scaffold_18 | plus  | 2140009 | 2140261 star1   | CGGTCCAGCATGCTCCTGCAGA    |
| MIR299   | 3p | 3062223 | 3062244 scaffold_13 | minus | 3062192 | 3062459 mature1 | TGCAGGCCTTGCCCGATGCGGC    |
| MIR299*  | 5p | 3062403 | 3062423 scaffold_13 | minus | 3062192 | 3062459 star1   | TCGGGCAAGGCCTGCATGTGA     |
| MIR300   | 5p | 748428  | 748450 scaffold_44  | plus  | 748399  | 748555 mature1  | TGCAGGTCGGTGTGTTGACACC    |
| MIR301   | 5p | 247614  | 247635 scaffold_68  | plus  | 247600  | 247696 mature1  | TGCAGTGTGCGTGCCAGATGGG    |
| MIR302   | 3p | 21293   | 21314 scaffold_48   | plus  | 21224   | 21359 mature1   | TGCAGTGTGCATCGACCATGGC    |
| MIR303a  | 5p | 2354029 | 2354049 scaffold_16 | plus  | 2354022 | 2354116 mature1 | TGCATCAGGAAGTGGGACTTC     |
| MIR303a* | 3p | 2354090 | 2354111 scaffold_16 | plus  | 2354022 | 2354116 star1   | TTGTACAAGTCTTCGATCCAG     |
| MIR303b  | 5p | 2072278 | 2072298 scaffold_17 | plus  | 2072273 | 2072362 mature1 | TGCATCAGGAAGTGGGACTTC     |
| MIR303b* | 3p | 2072339 | 2072360 scaffold_17 | plus  | 2072273 | 2072362 star1   | TTGTACAAGTCTTCGATCCAG     |
| MIR303c  | 5p | 8586    | 8606 scaffold_3     | plus  | 8581    | 8670 mature1    | TGCATCAGGAAGTGGGACTTC     |
| MIR303c* | 3p | 8647    | 8668 scaffold_3     | plus  | 8581    | 8670 star1      | TTGTACAAGTCTTCGATCCAG     |
| MIR304a  | 3p | 7263695 | 7263716 scaffold_1  | minus | 7263643 | 7263963 mature1 | TGCATCCGCCAGAACCCAGAACT   |
| MIR304a* | 5p | 7263898 | 7263919 scaffold_1  | minus | 7263643 | 7263963 star1   | TTCTGTCTTCCGGGATGCAGA     |
| MIR304b  | 3p | 7263900 | 7263921 scaffold_1  | plus  | 7263655 | 7263960 mature1 | TGCATCCGCCAGAACCCAGAACT   |
| MIR304b* | 5p | 7263700 | 7263720 scaffold_1  | plus  | 7263655 | 7263960 star1   | TGGTTCTGGCGGATGCAGACA     |
| MIR305a  | 5p | 446742  | 446761 scaffold_19  | minus | 446579  | 446789 mature1  | TGCATGGGATGGACAGCCCGC     |
| MIR305b  | 5p | 6137    | 6156 scaffold_54    | plus  | 6109    | 6330 mature2    | TGCATGGGATGGACAGCCCGC     |
| MIR306   | 5p | 1366404 | 1366425 scaffold_23 | plus  | 1366401 | 1366698 mature1 | TGCCAAGAAGTGCTGTTTGTCTC   |
| MIR306*  | 3p | 1366673 | 1366695 scaffold_23 | plus  | 1366401 | 1366698 star1   | TAGGGCAAACAGCACTTCTCGGC   |
| MIR307   | 3p | 2139355 | 2139374 scaffold_21 | minus | 2139251 | 2139577 mature1 | TGCCGCCCTCGTCTCTG         |
| MIR308   | 5p | 1000    | 1021 scaffold_1028  | plus  | 988     | 1060 mature1    | TGCCGGATAATCTCTACTCGG     |
| MIR308*  | 3p | 1031    | 1052 scaffold_1028  | plus  | 988     | 1060 star1      | TACTAGGATAATGTTGTGGGG     |
| MIR309   | 3p | 5039488 | 5039508 scaffold_2  | minus | 5039337 | 5039669 mature1 | TGCGAGACCATGACATGACA      |
| MIR309*  | 5p | 5039610 | 5039630 scaffold_2  | minus | 5039337 | 5039669 star1   | TGTCATGTCAACGGTCTCGCA     |
| MIR310   | 3p | 85768   | 85789 scaffold_35   | plus  | 85694   | 85795 mature1   | TGCGATGCGTTGATTCTCTCAG    |
| MIR310*  | 5p | 85703   | 85724 scaffold_35   | plus  | 85694   | 85795 star1     | GAGAGAATCGACGCCCGCAGT     |
| MIR311   | 3p | 1130276 | 1130300 scaffold_23 | plus  | 1130116 | 1130325 mature1 | TGCCGACAGGGCAGATGTGGAGCGG |
| MIR312   | 5p | 1728335 | 1728356 scaffold_27 | plus  | 1728277 | 1728550 mature1 | TGCCGACGAGGTTCGAGAAGAGC   |
| MIR312*  | 3p | 1728471 | 1728492 scaffold_27 | plus  | 1728277 | 1728550 star1   | TGCTTCTCTCACCTCGTCCGC     |
| MIR313   | 5p | 286651  | 286672 scaffold_59  | plus  | 286634  | 286971 mature1  | TGCCGATAGCCTTTGCGATGCA    |
| MIR313*  | 3p | 286932  | 286955 scaffold_59  | plus  | 286634  | 286971 star1    | CGTGATCGCAAAGGCTATCCGCA   |
| MIR314a  | 5p | 111325  | 111347 scaffold_81  | minus | 111228  | 111367 mature1  | TGCCGGTGGCTGTCCAGTCC      |
| MIR314b  | 5p | 64582   | 64604 scaffold_85   | minus | 64489   | 64621 mature1   | TGCCGGTGGCTGTCCAGTCC      |
| MIR314b* | 3p | 64504   | 64524 scaffold_85   | minus | 64489   | 64621 star1     | TGCACAGCAGCATTCCGACG      |
| MIR314c  | 5p | 1993443 | 1993465 scaffold_20 | plus  | 1993425 | 1993557 mature1 | TGCCGGTGGCTGTCCAGTCC      |
| MIR314c* | 3p | 1993523 | 1993543 scaffold_20 | plus  | 1993425 | 1993557 star1   | TGCACAGCAGCATTCCGACG      |
| MIR315   | 3p | 173309  | 173331 scaffold_17  | plus  | 173107  | 173372 mature1  | TGCGTATGCACAGAGAATCGGAT   |
| MIR315*  | 5p | 173150  | 173169 scaffold_17  | plus  | 173107  | 173372 star1    | TGCGATTCTCTGTGCATACG      |
| MIR316   | 3p | 904914  | 904935 scaffold_2   | minus | 904897  | 905138 mature1  | TGCTGACTGTTATCCGGAAGG     |
| MIR316*  | 5p | 905101  | 905122 scaffold_2   | minus | 904897  | 905138 star1    | TTCCGGAATAACAATTAGCGTT    |
| MIR317   | 3p | 3046386 | 3046406 scaffold_8  | plus  | 3046179 | 3046483 mature1 | TGCTGCCCAACGTATGCCGGC     |
| MIR318   | 5p | 180868  | 180888 scaffold_38  | plus  | 180848  | 180938 mature1  | TGCTGCCGCATGCAAGCTGT      |
| MIR319   | 3p | 1690486 | 1690508 scaffold_12 | plus  | 1690217 | 1690534 mature1 | TGCTCCGCTGTGAGGCTGTGGA    |
| MIR319*  | 5p | 1690249 | 1690271 scaffold_12 | plus  | 1690217 | 1690534 star1   | CACACCATACATGCTGCAGAGA    |
| MIR320a  | 5p | 79376   | 79396 scaffold_21   | plus  | 79364   | 79510 mature1   | TGCTGGCACAGCAAGCTGACG     |

|          |    |          |                     |       |          |                  |                           |
|----------|----|----------|---------------------|-------|----------|------------------|---------------------------|
| MIR320a* | 3p | 79487    | 79507 scaffold_21   | plus  | 79364    | 79510 star1      | TTGCTGTGCCAGCAATGGACT     |
| MIR320b  | 5p | 79480    | 79500 scaffold_21   | minus | 79364    | 79511 mature1    | TGCTGGCACAGCAAGCTGACG     |
| MIR320b* | 3p | 79369    | 79389 scaffold_21   | minus | 79364    | 79511 star1      | TTGCTGTGCCAGCAATGGACT     |
| MIR321a  | 3p | 4738836  | 4738855 scaffold_2  | plus  | 4738707  | 4738874 mature1  | TGCTTGATGATGAACGGGGG      |
| MIR321b  | 3p | 4738727  | 4738746 scaffold_2  | minus | 4738707  | 4738874 mature1  | TGCTTGATGATGAACGGGGG      |
| MIR322a  | 3p | 12369    | 12390 scaffold_7    | minus | 12352    | 12518 mature1    | TGGAAACTTAGGCTGTGAAAC     |
| MIR322a* | 5p | 12477    | 12499 scaffold_7    | minus | 12352    | 12518 star1      | TTCCGAGCTTAAGTTTTCCCAAA   |
| MIR322b  | 3p | 10548    | 10569 scaffold_47   | minus | 10531    | 10697 mature1    | TGGAAACTTAGGCTGTGAAAC     |
| MIR322b* | 5p | 10656    | 10678 scaffold_47   | minus | 10531    | 10697 star1      | TTCCGAGCTTAAGTTTTCCCAAA   |
| MIR322c  | 3p | 13539    | 13560 scaffold_192  | minus | 13522    | 13688 mature1    | TGGAAACTTAGGCTGTGAAAC     |
| MIR322c* | 5p | 13647    | 13669 scaffold_192  | minus | 13522    | 13688 star1      | TTCCGAGCTTAAGTTTTCCCAAA   |
| MIR323a  | 3p | 1994505  | 1994525 scaffold_14 | plus  | 1994452  | 1994560 mature1  | TGGAAGACCGGGTGTAGGCGG     |
| MIR323b  | 5p | 645056   | 645076 scaffold_22  | plus  | 645003   | 645139 mature1   | TGGAAGACCGGGTGTAGGCGG     |
| MIR323c  | 3p | 46016    | 46036 scaffold_78   | plus  | 45956    | 46080 mature1    | TGGAAGACCGGGTGTAGGCGG     |
| MIR324   | 5p | 115551   | 115570 scaffold_85  | plus  | 115514   | 115808 mature1   | TGGAAGATCCGGAGGTGAGG      |
| MIR324*  | 3p | 115676   | 115695 scaffold_85  | plus  | 115514   | 115808 star1     | TCCTGCACCCACCTCCGG        |
| MIR325a  | 3p | 10097908 | 10097928 scaffold_1 | plus  | 10097709 | 10097959 mature1 | TGGAAGCTGGGTCTGGAGGGC     |
| MIR325a* | 5p | 10097740 | 10097759 scaffold_1 | plus  | 10097709 | 10097959 star1   | TGCCCTCCAGACCCAGCTTC      |
| MIR325b  | 3p | 2479     | 2502 scaffold_321   | plus  | 2280     | 2530 mature1     | TGGAAGCTGGGTCTGGAGGGCATG  |
| MIR325b* | 5p | 2311     | 2330 scaffold_321   | plus  | 2280     | 2530 star1       | TGCCCTCCAGACCCAGCTTC      |
| MIR325c  | 3p | 6713     | 6736 scaffold_321   | plus  | 6541     | 6736 mature1     | TGGAAGCTGGGTCTGGAGGGCATG  |
| MIR325c* | 5p | 6544     | 6566 scaffold_321   | plus  | 6541     | 6736 star1       | TGCCCTCCAGACCCAGCTTC      |
| MIR326   | 3p | 673289   | 673310 scaffold_38  | minus | 673287   | 673351 mature1   | TGGAAGGTGGGGTGGATGCGCA    |
| MIR327   | 3p | 1572547  | 1572567 scaffold_13 | minus | 1572540  | 1572638 mature1  | TGGACAAGACAGGAGCTGCGC     |
| MIR328a  | 5p | 270615   | 270635 scaffold_51  | plus  | 270573   | 270864 mature1   | TGGACACGATATCGTCTGGCT     |
| MIR328a* | 3p | 270803   | 270826 scaffold_51  | plus  | 270573   | 270864 star1     | TAGCCAGACGATATCGTCTCCATG  |
| MIR328b  | 5p | 270804   | 270824 scaffold_51  | minus | 270611   | 270827 mature1   | TGGACACGATATCGTCTGGCT     |
| MIR328b* | 3p | 270614   | 270635 scaffold_51  | minus | 270611   | 270827 star1     | AGCCAGACGATATCGTCTCCAT    |
| MIR329   | 3p | 1972     | 1993 scaffold_94    | plus  | 1861     | 2089 mature1     | TGGACAGGGTCTTGAGACGGCT    |
| MIR329*  | 3p | 2013     | 2038 scaffold_94    | plus  | 1861     | 2089 star1       | TATCAAGACGCTTTCATCATGTGAT |
| MIR330a  | 5p | 1428388  | 1428409 scaffold_26 | plus  | 1428362  | 1428623 mature1  | TGGACTAGTTACTCCTGAGACG    |
| MIR330a* | 3p | 1428581  | 1428603 scaffold_26 | plus  | 1428362  | 1428623 star1    | TCAGGAGTAACTAGTCCAGTTGC   |
| MIR330b  | 5p | 277086   | 277107 scaffold_58  | minus | 276851   | 277149 mature1   | TGGACTAGTTACTCCTGAGACG    |
| MIR330b* | 3p | 276900   | 276920 scaffold_58  | minus | 276851   | 277149 star1     | TAACCCGCTCTCAGGAGTAACT    |
| MIR330c  | 5p | 276894   | 276915 scaffold_58  | plus  | 276856   | 277142 mature1   | TGGACTAGTTACTCCTGAGACG    |
| MIR330c* | 3p | 277090   | 277112 scaffold_58  | plus  | 276856   | 277142 star1     | TCAGGAGTAACTAGTCCAGTTGC   |
| MIR331   | 5p | 6263     | 6282 scaffold_76    | minus | 6054     | 6320 mature1     | TGGACTGAGGGTCAAGCAGGC     |
| MIR331*  | 3p | 6088     | 6107 scaffold_76    | minus | 6054     | 6320 star1       | TGCTGACCCTCAGTCCATGC      |
| MIR332a  | 3p | 6270     | 6290 scaffold_101   | plus  | 6142     | 6379 mature1     | TGGAGACTGCTTCATTTTGGGA    |
| MIR332b  | 3p | 371807   | 371827 scaffold_61  | minus | 371713   | 371958 mature1   | TGGAGACTGCTTCATTTTGGGA    |
| MIR332c  | 5p | 236883   | 236903 scaffold_47  | minus | 236745   | 236907 mature1   | TGGAGACTGCTTCATTTTGGGA    |
| MIR333   | 3p | 224296   | 224315 scaffold_4   | minus | 224234   | 224523 mature1   | TGGAGATTTGCGACGTGTT       |
| MIR333*  | 5p | 224441   | 224460 scaffold_4   | minus | 224234   | 224523 star1     | CGCGGGCGAAATCTCCAGC       |
| MIR334   | 5p | 92708    | 92728 scaffold_47   | minus | 92544    | 92755 mature1    | TGGAGGTGCCTTTTCTTAGGG     |
| MIR335   | 5p | 641654   | 641675 scaffold_28  | minus | 641411   | 641737 mature1   | TGGAGTGAAGTGGGCTGTTGG     |
| MIR336   | 3p | 4788180  | 4788199 scaffold_2  | plus  | 4788034  | 4788298 mature1  | TGGAGTTGGATTGGCAGGGG      |
| MIR337   | 3p | 1115349  | 1115371 scaffold_26 | minus | 1115340  | 1115506 mature1  | TGGATCGAGATTCGCACGCTGGA   |
| MIR337*  | 3p | 1115382  | 1115402 scaffold_26 | minus | 1115340  | 1115506 star1    | TGCTGAGATGGGATTTGAGG      |
| MIR338   | 3p | 53829    | 53850 scaffold_12   | plus  | 53758    | 53853 mature1    | TGGATGCTGGTGGTGGGTGCGG    |
| MIR339   | 5p | 366700   | 366723 scaffold_67  | plus  | 366632   | 366889 mature1   | TGGATGCTGATTGTCAGAACAGG   |
| MIR339*  | 3p | 366802   | 366823 scaffold_67  | plus  | 366632   | 366889 star1     | TGTCTGACAATACAGCATCCA     |
| MIR340   | 3p | 359707   | 359728 scaffold_25  | minus | 359690   | 359818 mature1   | TGGCAAGGAGAGACTGATGCGC    |
| MIR340*  | 5p | 359778   | 359799 scaffold_25  | minus | 359690   | 359818 star1     | CATCAGCTATCCTTGCCATCA     |
| MIR341   | 3p | 1275307  | 1275327 scaffold_22 | minus | 1275258  | 1275501 mature2  | TGGCAATGGCGGCAGTGGGGA     |
| MIR342   | 3p | 1733154  | 1733174 scaffold_28 | plus  | 1733083  | 1733185 mature1  | TGGCAATTGTGATGGCAGGGA     |
| MIR342*  | 5p | 1733104  | 1733125 scaffold_28 | plus  | 1733083  | 1733185 star1    | TGCCATCACCAATGCGCCGCTC    |
| MIR343   | 5p | 21762    | 21783 scaffold_39   | plus  | 21702    | 22029 mature2    | TGGCAGAGGAAGATAGGTGAGG    |
| MIR344a  | 5p | 2075309  | 2075329 scaffold_26 | minus | 2075105  | 2075377 mature1  | TGGCGACGGCGGCAATGGCGA     |
| MIR344b  | 5p | 115256   | 115276 scaffold_21  | minus | 115021   | 115283 mature1   | TGGCGACGGCGGCAATGGCGA     |
| MIR344b* | 3p | 115034   | 115057 scaffold_21  | minus | 115021   | 115283 star1     | TCCCTGCCATCGCCACTGCCACCG  |
| MIR344c  | 5p | 1733373  | 1733393 scaffold_28 | minus | 1733051  | 1733441 mature1  | TGGCGACGGCGGCAATGGCGA     |
| MIR344c* | 5p | 1733310  | 1733330 scaffold_28 | minus | 1733051  | 1733441 star1    | TGCCATTGCGCCGCTGCCCA      |
| MIR345a  | 3p | 1347773  | 1347793 scaffold_27 | minus | 1347671  | 1347904 mature1  | TGGCGACGGTGGCAATAGCGA     |
| MIR345b  | 3p | 1275286  | 1275306 scaffold_22 | minus | 1275258  | 1275501 mature1  | TGGCGACGGTGGCAATAGCGA     |
| MIR345b* | 5p | 1275447  | 1275467 scaffold_22 | minus | 1275258  | 1275501 star1    | ACAATTGCCACCGTCCGCATC     |
| MIR345c  | 3p | 3167983  | 3168003 scaffold_4  | plus  | 3167787  | 3168030 mature1  | TGGCGACGGTGGCAATAGCGA     |
| MIR345c* | 5p | 3167822  | 3167842 scaffold_4  | plus  | 3167787  | 3168030 star1    | ACAATTGCCACCGTCCGCATC     |
| MIR346a  | 3p | 70000    | 70020 scaffold_84   | minus | 69965    | 70089 mature1    | TGGCGACGGTGGCAATTGTGA     |
| MIR346a* | 5p | 70036    | 70056 scaffold_84   | minus | 69965    | 70089 star1      | TCACCATTGCCCGCTGCCCA      |
| MIR346b  | 3p | 3167820  | 3167840 scaffold_4  | minus | 3167787  | 3168030 mature2  | TGGCGACGGTGGCAATTGTGA     |
| MIR347a  | 5p | 985653   | 985674 scaffold_16  | plus  | 985610   | 985871 mature1   | TGGCGGATCAAGACAGTGCAGG    |
| MIR347a* | 3p | 985803   | 985824 scaffold_16  | plus  | 985610   | 985871 star1     | TGCACTGTCTTATCCGCGCAGG    |
| MIR347b  | 5p | 985801   | 985822 scaffold_16  | minus | 985594   | 985886 mature1   | TGGCGGATCAAGACAGTGCAGG    |
| MIR348   | 3p | 1515979  | 1516000 scaffold_18 | plus  | 1515868  | 1516008 mature1  | TGGCGGATGTACCTAAAAGGCA    |
| MIR348*  | 3p | 1515932  | 1515953 scaffold_18 | plus  | 1515868  | 1516008 star1    | TGCCTTTTAAGTGTCTTTAGGG    |
| MIR349a  | 5p | 8499     | 8519 scaffold_107   | minus | 8447     | 8537 mature1     | TGGCGCCGCTCCTCTGCGGGC     |
| MIR349b  | 5p | 11423    | 11443 scaffold_48   | minus | 11371    | 11461 mature1    | TGGCGCCGCTCCTCTGCGGGC     |

|          |    |          |                     |       |          |                  |                          |
|----------|----|----------|---------------------|-------|----------|------------------|--------------------------|
| MIR350   | 5p | 1994332  | 1994355 scaffold_20 | plus  | 1994272  | 1994615 mature2  | TGGCGGCTGGACAGGATTGTCCGC |
| MIR351   | 5p | 110437   | 110460 scaffold_81  | minus | 110176   | 110519 mature1   | TGGCGGCTGGACAGGATTGTCTGC |
| MIR351*  | 3p | 110239   | 110259 scaffold_81  | minus | 110176   | 110519 star1     | TGCTGCAGCGGACGATCCTGC    |
| MIR352a  | 5p | 11151    | 11171 scaffold_147  | plus  | 11126    | 11382 mature1    | TGGCGGCTGGGCAAGATTGTC    |
| MIR352a* | 3p | 11352    | 11372 scaffold_147  | plus  | 11126    | 11382 star1      | TGCTGCAGCGGACGATCCTGC    |
| MIR352b  | 5p | 2004069  | 2004089 scaffold_20 | plus  | 2004067  | 2004300 mature1  | TGGCGGCTGGGCAAGATTGTC    |
| MIR352b* | 3p | 2004270  | 2004290 scaffold_20 | plus  | 2004067  | 2004300 star1    | TGCTGCAGCGGACGATCCTGC    |
| MIR352c  | 5p | 2050158  | 2050178 scaffold_20 | plus  | 2050155  | 2050389 mature1  | TGGCGGCTGGGCAAGATTGTC    |
| MIR352c* | 3p | 2050359  | 2050379 scaffold_20 | plus  | 2050155  | 2050389 star1    | TGCTGCAGCGGACGATCCTGC    |
| MIR352d  | 5p | 1605196  | 1605216 scaffold_25 | plus  | 1605194  | 1605427 mature1  | TGGCGGCTGGGCAAGATTGTC    |
| MIR352d* | 3p | 1605397  | 1605417 scaffold_25 | plus  | 1605194  | 1605427 star1    | TGCTGCAGCGGACGATCCTGC    |
| MIR352e  | 5p | 1804300  | 1804320 scaffold_28 | minus | 1804088  | 1804321 mature1  | TGGCGGCTGGGCAAGATTGTC    |
| MIR352e* | 3p | 1804099  | 1804119 scaffold_28 | minus | 1804088  | 1804321 star1    | TGCTGCAGCGGACGATCCTGC    |
| MIR352f  | 5p | 81233    | 81253 scaffold_56   | plus  | 81230    | 81464 mature1    | TGGCGGCTGGGCAAGATTGTC    |
| MIR352f* | 3p | 81434    | 81454 scaffold_56   | plus  | 81230    | 81464 star1      | TGCTGCAGCGGACGATCCTGC    |
| MIR352g  | 5p | 49679    | 49699 scaffold_68   | minus | 49467    | 49700 mature1    | TGGCGGCTGGGCAAGATTGTC    |
| MIR352g* | 3p | 49478    | 49498 scaffold_68   | minus | 49467    | 49700 star1      | TGCTGCAGCGGACGATCCTGC    |
| MIR353   | 3p | 132419   | 132439 scaffold_25  | minus | 132327   | 132630 mature1   | TGGGACCCTGATACGAAGCT     |
| MIR353*  | 5p | 132516   | 132535 scaffold_25  | minus | 132327   | 132630 star1     | TTCTGATCAGCGTCCCAGG      |
| MIR354   | 3p | 3920511  | 3920533 scaffold_1  | minus | 3920429  | 3920622 mature1  | TGGGATACCTAGAATTTGTACG   |
| MIR355a  | 5p | 4114708  | 4114728 scaffold_4  | plus  | 4114604  | 4114936 mature1  | TGGGATGAGGGCTGGGACTGG    |
| MIR355a* | 3p | 4114812  | 4114832 scaffold_4  | plus  | 4114604  | 4114936 star1    | TCCAGTCCCAGCCCTCATCCC    |
| MIR355b  | 5p | 4114813  | 4114833 scaffold_4  | minus | 4114609  | 4114931 mature1  | TGGGATGAGGGCTGGGACTGG    |
| MIR355b* | 3p | 4114709  | 4114729 scaffold_4  | minus | 4114609  | 4114931 star1    | TCCAGTCCCAGCCCTCATCCC    |
| MIR356   | 3p | 272011   | 272031 scaffold_58  | minus | 272008   | 272096 mature1   | TGGGATGTCACGATGAGGACG    |
| MIR357a  | 3p | 486018   | 486039 scaffold_53  | plus  | 485814   | 486048 mature2   | TGGGCCCCAAACCGTCGGTAAC   |
| MIR357b  | 3p | 340370   | 340391 scaffold_62  | plus  | 340214   | 340412 mature1   | TGGGCCCCAAACCGTCGGTAAC   |
| MIR357c  | 3p | 2513214  | 2513235 scaffold_11 | plus  | 2513058  | 2513256 mature1  | TGGGCCCCAAACCGTCGGTAAC   |
| MIR357d  | 3p | 28978    | 28999 scaffold_95   | minus | 28956    | 29154 mature1    | TGGGCCCCAAACCGTCGGTAAC   |
| MIR357d* | 5p | 29109    | 29131 scaffold_95   | minus | 28956    | 29154 star1      | TACCGACCGTTTGGGGCTCATT   |
| MIR357e  | 3p | 255519   | 255540 scaffold_68  | minus | 255497   | 255695 mature1   | TGGGCCCCAAACCGTCGGTAAC   |
| MIR357e* | 5p | 255651   | 255672 scaffold_68  | minus | 255497   | 255695 star1     | TACCGACCGTTTGGGGCTCATT   |
| MIR357f  | 3p | 11926    | 11947 scaffold_90   | minus | 11904    | 12102 mature1    | TGGGCCCCAAACCGTCGGTAAC   |
| MIR357g  | 3p | 21958    | 21979 scaffold_95   | plus  | 21818    | 22000 mature1    | TGGGCCCCAAACCGTCGGTAAC   |
| MIR357g* | 5p | 21843    | 21863 scaffold_95   | plus  | 21818    | 22000 star1      | ACCGACCGTTTGGGGCCATT     |
| MIR357h  | 3p | 3120027  | 3120048 scaffold_1  | minus | 3120005  | 3120203 mature1  | TGGGCCCCAAACCGTCGGTAAC   |
| MIR357h* | 5p | 3120159  | 3120180 scaffold_1  | minus | 3120005  | 3120203 star1    | TACCGACCGTTTGGGGCTCATT   |
| MIR357i  | 3p | 1036213  | 1036234 scaffold_11 | plus  | 1036057  | 1036255 mature1  | TGGGCCCCAAACCGTCGGTAAC   |
| MIR357i* | 5p | 1036081  | 1036102 scaffold_11 | plus  | 1036057  | 1036255 star1    | TACCGACTGTTTGGGGCCATT    |
| MIR357j  | 3p | 485957   | 485978 scaffold_53  | plus  | 485814   | 486048 mature1   | TGGGCCCCAAACCGTCGGTAAC   |
| MIR357k  | 3p | 256294   | 256315 scaffold_74  | plus  | 256121   | 256353 mature1   | TGGGCCCCAAACCGTCGGTAAC   |
| MIR357l  | 3p | 117277   | 117298 scaffold_84  | plus  | 117102   | 117319 mature1   | TGGGCCCCAAACCGTCGGTAAC   |
| MIR357l* | 5p | 117145   | 117166 scaffold_84  | plus  | 117102   | 117319 star1     | TACCGACCGTTTGGGGCTCATT   |
| MIR358   | 3p | 14115793 | 14115814 scaffold_1 | minus | 14115752 | 14115955 mature2 | TGGGCCCCGAACCGTCGGTAAC   |
| MIR359   | 3p | 1428401  | 1428421 scaffold_26 | minus | 1428369  | 1428623 mature1  | TGGGCGTAACCCGCTCAGG      |
| MIR360a  | 3p | 10354    | 10376 scaffold_172  | plus  | 10239    | 10405 mature1    | TGGGCTGTGAGCTTTGGAAAAC   |
| MIR360a* | 5p | 10272    | 10295 scaffold_172  | plus  | 10239    | 10405 star1      | TTTTCCAAAGCCCTCAGCCAGT   |
| MIR360b  | 3p | 13341    | 13363 scaffold_118  | plus  | 13226    | 13392 mature1    | TGGGCTGTGAGCTTTGGAAAAC   |
| MIR360c  | 3p | 19944    | 19966 scaffold_115  | plus  | 19829    | 19995 mature1    | TGGGCTGTGAGCTTTGGAAAAC   |
| MIR360c* | 5p | 19862    | 19885 scaffold_115  | plus  | 19829    | 19995 star1      | TTTTCCAAAGCCCTCAGCCAGT   |
| MIR360d  | 3p | 1855     | 1877 scaffold_936   | plus  | 1740     | 1906 mature1     | TGGGCTGTGAGCTTTGGAAAAC   |
| MIR360e  | 3p | 14147990 | 14148012 scaffold_1 | plus  | 14147875 | 14148043 mature1 | TGGGCTGTGAGCTTTGGAAAAC   |
| MIR360f  | 3p | 137854   | 137876 scaffold_93  | plus  | 137719   | 137930 mature1   | TGGGCTGTGAGCTTTGGAAAAC   |
| MIR360f* | 5p | 137772   | 137795 scaffold_93  | plus  | 137719   | 137930 star1     | TTTTCCAAAGCCCTCAGCCAGT   |
| MIR361   | 3p | 12924    | 12945 scaffold_3    | plus  | 12753    | 12963 mature1    | TGGGGCATACTCTGGTGTGCC    |
| MIR361*  | 5p | 12776    | 12797 scaffold_3    | plus  | 12753    | 12963 star1      | TGCCCTTGCCTCGCGCATGCC    |
| MIR362   | 3p | 1861553  | 1861577 scaffold_12 | minus | 1861518  | 1861704 mature1  | TGGGGTTAGGACTCCTGCTGAACA |
| MIR362*  | 5p | 1861633  | 1861657 scaffold_12 | minus | 1861518  | 1861704 star1    | CTCAGCAGGTTGCCTAGCCCCAGC |
| MIR363   | 3p | 733003   | 733024 scaffold_37  | minus | 732996   | 733244 mature1   | TGGGTACCTGCGAGCAGAAAGAG  |
| MIR364   | 3p | 873089   | 873109 scaffold_3   | minus | 873087   | 873145 mature1   | TGGGTCCGGAGCGCGGTAAG     |
| MIR365   | 5p | 397275   | 397295 scaffold_62  | plus  | 397266   | 397327 mature1   | TGGTAGTTGGTCTGCTGCC      |
| MIR366   | 3p | 2104464  | 2104485 scaffold_12 | plus  | 2104328  | 2104497 mature1  | TGGTCAGACCATCAACGGGC     |
| MIR366*  | 5p | 2104343  | 2104364 scaffold_12 | plus  | 2104328  | 2104497 star1    | CTGCTGGGTAGCTCTGACCACC   |
| MIR367   | 3p | 3881168  | 3881189 scaffold_6  | plus  | 3881126  | 3881196 mature1  | TGGTCTGCTGTTGCTGCTGC     |
| MIR368   | 3p | 104021   | 104044 scaffold_50  | plus  | 103849   | 104081 mature1   | TGGTGACGGTGGGATGGCAACGG  |
| MIR368*  | 5p | 103853   | 103874 scaffold_50  | plus  | 103849   | 104081 star1     | TGTGCCATCCCCTCATCGCC     |
| MIR369   | 5p | 2375495  | 2375516 scaffold_4  | plus  | 2375490  | 2375563 mature1  | TGGTGGTTGGACTCCGGCAGCA   |
| MIR370   | 3p | 2509137  | 2509157 scaffold_11 | minus | 2509129  | 2509456 mature1  | TGGTGTGAAGATATGCTGGCG    |
| MIR370*  | 5p | 2509427  | 2509447 scaffold_11 | minus | 2509129  | 2509456 star1    | CCAGCATATCTTACACCAAT     |
| MIR371   | 3p | 4012988  | 4013009 scaffold_5  | minus | 4012905  | 4013258 mature1  | TGGTTGGGATGTCAAGATGGTT   |
| MIR371*  | 5p | 4013078  | 4013099 scaffold_5  | minus | 4012905  | 4013258 star1    | CATTGTGACATCCCAACGAGA    |
| MIR372   | 5p | 944620   | 944642 scaffold_19  | minus | 944520   | 944655 mature1   | TGTACTTGTGACGGGTCTCCTCT  |
| MIR373   | 3p | 2403024  | 2403043 scaffold_5  | plus  | 2402794  | 2403117 mature1  | TGTAGAAGTGACCCCTGGAC     |
| MIR374   | 3p | 18678    | 18698 scaffold_33   | plus  | 18610    | 18713 mature1    | TGTAGACCGTACTGTGTACC     |
| MIR375   | 3p | 124044   | 124066 scaffold_51  | plus  | 123877   | 124081 mature1   | TGTAGCGATGAGAGAAAGAGGC   |
| MIR375*  | 5p | 123896   | 123917 scaffold_51  | plus  | 123877   | 124081 star1     | TCITTCCTCATCGTACAGC      |
| MIR376   | 3p | 1861531  | 1861552 scaffold_12 | minus | 1861518  | 1861704 mature2  | TGTATGCATGATGGGACGG      |



|          |    |          |                     |       |          |                  |                          |
|----------|----|----------|---------------------|-------|----------|------------------|--------------------------|
| MIR377   | 3p | 1597828  | 1597850 scaffold_24 | minus | 1597782  | 1598074 mature1  | TGTATGTTTTCTCCTTCGGTTGC  |
| MIR378   | 3p | 1367485  | 1367506 scaffold_23 | plus  | 1367269  | 1367545 mature1  | TGTCATCAAGTGCCCCAGCTGC   |
| MIR378*  | 5p | 1367300  | 1367321 scaffold_23 | plus  | 1367269  | 1367545 star1    | AGCTGTGGCACTTGACGATATT   |
| MIR379a  | 5p | 1446797  | 1446817 scaffold_25 | plus  | 1446695  | 1447038 mature1  | TGTCATGTCAACGGTCTCGCA    |
| MIR379a* | 3p | 1446918  | 1446938 scaffold_25 | plus  | 1446695  | 1447038 star1    | TGCGAGACCGTTGACATGACA    |
| MIR379b  | 3p | 428239   | 428259 scaffold_21  | minus | 428235   | 428288 mature1   | TGTCATGTCAACGGTCTCGCA    |
| MIR379c  | 5p | 1446918  | 1446938 scaffold_25 | minus | 1446682  | 1447041 mature1  | TGTCATGTCAACGGTCTCGCA    |
| MIR379c* | 3p | 1446797  | 1446817 scaffold_25 | minus | 1446682  | 1447041 star1    | TGCGAGACCGTTGACATGACA    |
| MIR380   | 3p | 469925   | 469946 scaffold_38  | minus | 469890   | 470021 mature2   | TGTCACCATGTGATAAAGACA    |
| MIR381   | 5p | 431963   | 431984 scaffold_56  | plus  | 431937   | 432245 mature2   | TGTCACGGACCTGAAGGGGCT    |
| MIR382   | 3p | 1991821  | 1991841 scaffold_23 | plus  | 1991648  | 1991863 mature1  | TGTCACCGTAAGTATGCACT     |
| MIR382*  | 5p | 1991670  | 1991690 scaffold_23 | plus  | 1991648  | 1991863 star1    | TGCATCAGTTGCCCGGACATG    |
| MIR383a  | 5p | 220944   | 220964 scaffold_4   | plus  | 220903   | 221153 mature1   | TGTCGATTACCGGGAATAGCA    |
| MIR383a* | 3p | 221095   | 221115 scaffold_4   | plus  | 220903   | 221153 star1     | TGCTATTCCCGGTAATCGACA    |
| MIR383b  | 5p | 221095   | 221115 scaffold_4   | minus | 220903   | 221154 mature1   | TGTCGATTACCGGGAATAGCA    |
| MIR383b* | 3p | 220944   | 220964 scaffold_4   | minus | 220903   | 221154 star1     | TGCTATTCCCGGTAATCGACA    |
| MIR384   | 5p | 364840   | 364858 scaffold_23  | plus  | 364827   | 364926 mature1   | TGTCAGGACATAAAGCT        |
| MIR385   | 3p | 163937   | 163958 scaffold_54  | plus  | 163724   | 163978 mature1   | TGTGAACGACTCTGGGGCTGGC   |
| MIR386   | 5p | 1381990  | 1382010 scaffold_2  | plus  | 1381982  | 1382073 mature1  | TGTGCAGCTGCCACCGCCGCGC   |
| MIR387   | 3p | 1597153  | 1597173 scaffold_30 | plus  | 1597023  | 1597195 mature1  | TGTGCCTGCTGTGATGACTGC    |
| MIR388   | 3p | 1071257  | 1071278 scaffold_25 | plus  | 1071164  | 1071282 mature1  | TGTGCTGCTGCTGCCGCTCGATG  |
| MIR389   | 5p | 709395   | 709414 scaffold_12  | plus  | 709380   | 709663 mature1   | TGTGCAGCGACTTCAACGGG     |
| MIR389*  | 3p | 709639   | 709659 scaffold_12  | plus  | 709380   | 709663 star1     | TGAAGTCTTCCACAGCCGGA     |
| MIR390a  | 5p | 367043   | 367063 scaffold_58  | plus  | 367025   | 367187 mature1   | TGTGGCCAGTTGCACCGTATG    |
| MIR390a* | 3p | 367153   | 367173 scaffold_58  | plus  | 367025   | 367187 star1     | TACGGTGCAACTGGCCACACA    |
| MIR390b  | 5p | 367151   | 367171 scaffold_58  | minus | 367026   | 367188 mature1   | TGTGGCCAGTTGCACCGTATG    |
| MIR390b* | 3p | 367041   | 367061 scaffold_58  | minus | 367026   | 367188 star1     | TACGGTGCAACTGGCCACACA    |
| MIR391   | 3p | 1482220  | 1482240 scaffold_32 | minus | 1482190  | 1482273 mature1  | TGTGGGACGAGGCAGCAGACC    |
| MIR392   | 5p | 458561   | 458581 scaffold_41  | plus  | 458530   | 458781 mature1   | TGTGGGACGCGACTTATAAGC    |
| MIR392*  | 3p | 458732   | 458752 scaffold_41  | plus  | 458530   | 458781 star1     | TTATAAGTCGCGTCCCATAGC    |
| MIR393   | 3p | 66055    | 66075 scaffold_38   | plus  | 65869    | 66105 mature1    | TGTGGGGCGCGCAAAAGAACT    |
| MIR394   | 3p | 12901    | 12921 scaffold_3    | plus  | 12753    | 12963 mature2    | TGTGTACGGACGCTGTGCAGC    |
| MIR395a  | 3p | 52253    | 52274 scaffold_78   | plus  | 52109    | 52277 mature2    | TGTGTAGGACGAAGGGAGAAG    |
| MIR395a* | 5p | 52110    | 52131 scaffold_78   | plus  | 52109    | 52277 star?      | CTTTTCTCCGCTCGGGAATGC    |
| MIR395b  | 3p | 1067437  | 1067460 scaffold_15 | plus  | 1067293  | 1067461 mature2  | TGTGTAGGACGAAGGGAGAAGTT  |
| MIR396   | 3p | 1450545  | 1450565 scaffold_20 | plus  | 1450285  | 1450626 mature2  | TGTGTATGTGGCGAAAATCT     |
| MIR396*  | 5p | 1450350  | 1450370 scaffold_20 | plus  | 1450285  | 1450626 star2    | TTTTACCCACATGCACAACG     |
| MIR397   | 3p | 13802131 | 13802152 scaffold_1 | minus | 13802062 | 13802340 mature1 | TGTGTTGGAATTGCGAGCAGCG   |
| MIR398a  | 3p | 805726   | 805747 scaffold_39  | plus  | 805539   | 805782 mature1   | TGTTAGTCTCCACCGAGGCAGG   |
| MIR398b  | 3p | 805601   | 805622 scaffold_39  | minus | 805533   | 805783 mature2   | TGTTAGTCTCCACCGAGGCAGG   |
| MIR399   | 3p | 530705   | 530725 scaffold_15  | minus | 530684   | 530950 mature1   | TGTTAGTCTCCACCGAGGCAGG   |
| MIR399*  | 5p | 530911   | 530932 scaffold_15  | minus | 530684   | 530950 star1     | TGGACGACGATTTCATCTGACC   |
| MIR400   | 5p | 1341080  | 1341100 scaffold_26 | plus  | 1341051  | 1341300 mature1  | TGTTGAAATGTTGACCGTAGC    |
| MIR401   | 3p | 380097   | 380120 scaffold_8   | plus  | 379878   | 380156 mature2   | TGTTGACCAAGGATCGAGGGACT  |
| MIR402   | 3p | 1563114  | 1563135 scaffold_18 | minus | 1563092  | 1563210 mature1  | TGTTTGGAGAGTGATGAAATGG   |
| MIR403   | 5p | 218258   | 218280 scaffold_60  | plus  | 218198   | 218396 mature2?  | TTAACCCAGCTGATCGTTAACCC  |
| MIR404a  | 3p | 1385477  | 1385497 scaffold_8  | plus  | 1385272  | 1385546 mature1  | TTAAGACAATGACCGGCATA     |
| MIR404a* | 5p | 1385303  | 1385324 scaffold_8  | plus  | 1385272  | 1385546 star1    | TATGCCCGTCATTGTTCTTAAG   |
| MIR404b  | 3p | 1385302  | 1385323 scaffold_8  | minus | 1385263  | 1385527 mature1  | TTAAGACAATGACCGGCATAT    |
| MIR404b* | 5p | 1385476  | 1385497 scaffold_8  | minus | 1385263  | 1385527 star1    | TATGCCCGTCATTGTTCTTAAG   |
| MIR405   | 3p | 2206716  | 2206736 scaffold_8  | minus | 2206685  | 2206890 mature2  | TTAAGCGAAGTACGACTTCC     |
| MIR406   | 3p | 7676064  | 7676084 scaffold_1  | minus | 7676008  | 7676278 mature1  | TTAATCGGATGGGATAAAGG     |
| MIR407   | 3p | 379918   | 379939 scaffold_8   | minus | 379870   | 380165 mature1   | TTACACCAAAGGTCGAGCGACT   |
| MIR407*  | 5p | 380097   | 380118 scaffold_8   | minus | 379870   | 380165 star1     | TCCCTCGATCCTTGGTGCAACA   |
| MIR408a  | 5p | 4503412  | 4503434 scaffold_1  | minus | 4503196  | 4503466 mature1  | TTAGATTGCGAGACTCATGGAGA  |
| MIR408a* | 3p | 4503218  | 4503240 scaffold_1  | minus | 4503196  | 4503466 star1    | TCCATGAGTCTCGCAATCTAACA  |
| MIR408b  | 5p | 4503220  | 4503242 scaffold_1  | plus  | 4503207  | 4503445 mature1  | TTAGATTGCGAGACTCATGGAGA  |
| MIR408b* | 3p | 4503414  | 4503436 scaffold_1  | plus  | 4503207  | 4503445 star1    | TCCATGAGTCTCGCAATCTAACA  |
| MIR409   | 3p | 1450566  | 1450589 scaffold_20 | plus  | 1450285  | 1450626 mature1  | TTAGGACAAAGGGGATATTGGGC  |
| MIR409*  | 5p | 1450325  | 1450348 scaffold_20 | plus  | 1450285  | 1450626 star1    | CCAAACATCCCCTTTGTCTTAAAG |
| MIR410   | 3p | 1052138  | 1052160 scaffold_5  | plus  | 1052028  | 1052208 mature1  | TTCACCCGTGGCAGCTACCCGGC  |
| MIR411   | 5p | 6163     | 6184 scaffold_54    | plus  | 6109     | 6330 mature1     | TTCCTGTGCGACGAGGTCCTGG   |
| MIR412   | 3p | 948906   | 948926 scaffold_23  | minus | 948820   | 949127 mature1   | TTCCCGCTCTGACCCATGCC     |
| MIR412*  | 5p | 949022   | 949042 scaffold_23  | minus | 948820   | 949127 star1     | TGGCAAGGGGTCAGAACGGGA    |
| MIR413   | 5p | 3611742  | 3611763 scaffold_5  | minus | 3611556  | 3611879 mature1  | TTCCGACGGTGTGGTCCCAAGC   |
| MIR413*  | 3p | 3611671  | 3611692 scaffold_5  | minus | 3611556  | 3611879 star1    | TGGGACAGACCCATCGGAAGA    |
| MIR414   | 3p | 12674117 | 12674138 scaffold_1 | minus | 12674068 | 12674407 mature1 | TTCGGCGAAGATGCCCTGCACC   |
| MIR414*  | 5p | 12674381 | 12674402 scaffold_1 | minus | 12674068 | 12674407 star1   | TGCAGGGCATTCTCGCCGAATA   |
| MIR415   | 3p | 520662   | 520683 scaffold_31  | plus  | 520637   | 520741 mature1   | TTCGTCAAAGCTGCTACGCTGC   |
| MIR416   | 3p | 530880   | 530900 scaffold_15  | minus | 530690   | 530944 mature1   | TTCTGTGACGTGAATCCCCT     |
| MIR416*  | 5p | 530733   | 530753 scaffold_15  | plus  | 530690   | 530944 star1     | TGAGGGGATTCAGCTCAACT     |
| MIR417   | 5p | 7654214  | 7654233 scaffold_1  | minus | 7653849  | 7654271 mature2  | TTCTCAGCGCTCTGCCCGGC     |
| MIR418   | 5p | 1963103  | 1963125 scaffold_15 | minus | 1962905  | 1963143 mature1  | TTCTGGATATCAGAGGACACACA  |
| MIR418*  | 3p | 1962922  | 1962943 scaffold_15 | minus | 1962905  | 1963143 star1    | TGTGCTCTGATATGCAGAAT     |
| MIR419   | 5p | 60660    | 60681 scaffold_66   | plus  | 60650    | 60753 mature1    | TTCTTATCATGGTGGACAGG     |
| MIR420a  | 5p | 33606    | 33626 scaffold_86   | plus  | 33594    | 33668 mature1    | TTCTTCTGTGTTACGTAGC      |
| MIR420b  | 5p | 888109   | 888129 scaffold_9   | minus | 888066   | 888140 mature1   | TTCTTCTGTGTTACGTAGC      |

|         |    |         |                     |       |         |                 |                         |
|---------|----|---------|---------------------|-------|---------|-----------------|-------------------------|
| MIR420c | 5p | 8192    | 8212 scaffold_38    | plus  | 8180    | 8256 mature1    | TTCTTCTTCTGGTTACGTAGC   |
| MIR421  | 3p | 432158  | 432179 scaffold_56  | plus  | 431937  | 432245 mature1  | TTGAACAAGTCGAGCGGCACTG  |
| MIR421* | 5p | 431998  | 432019 scaffold_56  | plus  | 431937  | 432245 star1    | TATTTACAGTCCCGCTCGACT   |
| MIR422  | 3p | 874574  | 874594 scaffold_24  | minus | 874558  | 874756 mature1  | TTGAGGGCTTAATCCACTGG    |
| MIR423  | 5p | 4503386 | 4503408 scaffold_1  | minus | 4503196 | 4503466 mature2 | TTGACAGGAAATACAGAAGATC  |
| MIR423* | 3p | 4503241 | 4503261 scaffold_1  | minus | 4503196 | 4503466 star2   | TGTATTTCCCTATCAAGGTTC   |
| MIR424  | 3p | 1853006 | 1853026 scaffold_27 | minus | 1852911 | 1853359 mature1 | TTGACCAGTGGAAATCCGAGC   |
| MIR424* | 5p | 1853241 | 1853262 scaffold_27 | minus | 1852911 | 1853359 star1   | TCGGAATTCATTTGGTCAACGG  |
| MIR425  | 5p | 145576  | 145596 scaffold_40  | plus  | 145536  | 145839 mature1  | TTGACTTGTGCAAAATGGACC   |
| MIR426  | 5p | 104855  | 104876 scaffold_78  | plus  | 104774  | 105084 mature1  | TTGAGCTGGGATTTAGTGCGAGA |
| MIR427  | 5p | 1226785 | 1226807 scaffold_27 | plus  | 1226679 | 1227017 mature1 | TTGATGTAGAGCTTGCACCCGGG |
| MIR428  | 5p | 1937459 | 1937479 scaffold_3  | plus  | 1937371 | 1937630 mature1 | TTGCATAACTGCCACCATAGA   |
| MIR429  | 5p | 1437642 | 1437663 scaffold_23 | minus | 1437556 | 1437665 mature1 | TTGCCACCGTCGCCATCCCTGC  |
| MIR429* | 3p | 1437557 | 1437578 scaffold_23 | minus | 1437556 | 1437665 star1   | GGGGATGGTGATGGCGGCAGTG  |
| MIR430  | 5p | 4834897 | 4834918 scaffold_1  | plus  | 4834891 | 4834951 mature1 | TTGCGTGGGGTCCATCGGTAT   |
| MIR431  | 3p | 2822256 | 2822277 scaffold_5  | minus | 2822187 | 2822451 mature1 | TTGTCTGCTAGACCTCGGTCCGG |
| MIR432  | 3p | 4726173 | 4726193 scaffold_3  | minus | 4726163 | 4726384 mature1 | TTGGCAAACTCTGCAAGGCA    |
| MIR432* | 5p | 4726350 | 4726371 scaffold_3  | minus | 4726163 | 4726384 star1   | TGCCTTGCAGAGATTTGCTAAG  |
| MIR433  | 5p | 3520136 | 3520157 scaffold_4  | plus  | 3520095 | 3520350 mature1 | TTGGCAGGCTCCGGAGCGGACT  |
| MIR434  | 3p | 9765    | 9785 scaffold_31    | plus  | 9583    | 9822 mature1    | TTGGGTGCCCCAAGACATTCC   |
| MIR434* | 5p | 9625    | 9645 scaffold_31    | plus  | 9583    | 9822 star1      | TGTCTCGTCAACCCAAATGCA   |
| MIR435  | 3p | 7601    | 7621 scaffold_86    | plus  | 7511    | 7706 mature1    | TTGGTGGTGTCTTTCACCGGCA  |
| MIR436  | 5p | 293642  | 293662 scaffold_54  | plus  | 293636  | 293695 mature1  | TTGTACTGTAATTTTAGTT     |
| MIR437  | 5p | 430206  | 430226 scaffold_40  | minus | 430127  | 430227 mature1  | TTGTCAAAGTCAAAGAGTGGG   |
| MIR438  | 5p | 1728477 | 1728498 scaffold_27 | minus | 1728260 | 1728568 mature1 | TTGTCTGCGGACGAGGTGCGAGA |
| MIR438* | 3p | 1728336 | 1728357 scaffold_27 | minus | 1728260 | 1728568 star1   | TGCTCTTCTCGACCTCGTCCGC  |
| MIR439  | 5p | 516710  | 516730 scaffold_12  | minus | 516508  | 516786 mature1  | TTGTTGGTGTGAGTTTCTCTGA  |
| MIR439* | 3p | 516562  | 516582 scaffold_12  | minus | 516508  | 516786 star1    | AGGAAACTGACACCAACAAGT   |
| MIR440  | 5p | 2680793 | 2680812 scaffold_3  | plus  | 2680791 | 2680897 mature1 | TTGTTGTCGAGCTGATTGGG    |
| MIR441  | 5p | 238379  | 238400 scaffold_13  | plus  | 238352  | 238683 mature1  | TTTAAATGCTGTTGCCTTGGCC  |
| MIR442  | 3p | 173331  | 173351 scaffold_17  | plus  | 173107  | 173372 mature2  | TTTCAATCTCAACTTAGACTT   |
| MIR442* | 5p | 173128  | 173150 scaffold_17  | plus  | 173107  | 173372 star2    | TATGTCTAAGTTGAGATCGAAAT |
| MIR443  | 3p | 7653905 | 7653926 scaffold_1  | minus | 7653849 | 7654271 mature1 | TTTCTGAACCGCAGTGGAAAGC  |
| MIR444a | 3p | 430487  | 430508 scaffold_40  | plus  | 430264  | 430542 mature1  | TTTCTTCATCGCTACCTCTGAG  |
| MIR444b | 3p | 430300  | 430321 scaffold_40  | minus | 430258  | 430543 mature1  | TTTCTTCATCGCTACCTCTGAG  |
| MIR445a | 3p | 541208  | 541229 scaffold_20  | minus | 541204  | 541297 mature1  | TTTGCAAGACGGTTGGAGTGGG  |
| MIR445b | 3p | 265280  | 265301 scaffold_31  | plus  | 265211  | 265304 mature1  | TTTGCAAGACGGTTGGAGTGGG  |
| MIR446a | 3p | 114981  | 115001 scaffold_49  | plus  | 114893  | 115038 mature1  | TTTGGCCTGTCTGCGGAGATG   |
| MIR446b | 3p | 1333521 | 1333541 scaffold_5  | plus  | 1333482 | 1333549 mature1 | TTTGGCCTGTCTGCGGAGATG   |
| MIR447a | 3p | 594518  | 594538 scaffold_38  | minus | 594473  | 594770 mature1  | TTTGGTAGCTGTTGAGACA     |
| MIR447b | 3p | 594706  | 594726 scaffold_38  | plus  | 594449  | 594794 mature1  | TTTGGTAGCTGTTGAGACA     |
| MIR448  | 5p | 842816  | 842837 scaffold_6   | plus  | 842709  | 843072 mature1  | TTTGTGATGTCACCGTCTCGC   |
| MIR449  | 3p | 1326423 | 1326444 scaffold_2  | minus | 1326323 | 1326644 mature1 | TGAGTGTGAGTCTGAGCTGGG   |
| MIR449* | 5p | 1326516 | 1326538 scaffold_2  | minus | 1326323 | 1326644 star1   | TCAGGACTCACACTCATGTCTGT |
