# Supplementary material for: Gene silencing pathways found in the green alga Volvox carteri reveal insights into evolution and origins of small RNA systems in plants
Source: PubMed Central journal article supplement (PMC5093975; doi:10.1186/s12864-016-3202-4), 2016-11-02
Supplement: 12864_2016_3202_MOESM5_ESM.pdf [file 12864_2016_3202_MOESM5_ESM.pdf]

**MIR178a**

TTACCCGGGGTTTGCCAGCCAT-5'  
|||||  
5'-AACCGCCGGTTGGGTTAATGGGCCCAACGGTCGGTAACCGGCATGT

*Jordan*  
@ scaffold\_53:484418-486012

**MIR357b**

CAATGGCTGGCAAACCCCGGT-5'  
|||||  
5'-AATATATAGCTTACCGACCGTTTGGGGCCCATTAACCAACCGGCCGTTGA

*Jordan*  
@ scaffold\_26:1420739-1422333
