# Supplementary material for: Gene silencing pathways found in the green alga Volvox carteri reveal insights into evolution and origins of small RNA systems in plants
Source: PubMed Central journal article supplement (PMC5093975; doi:10.1186/s12864-016-3202-4), 2016-11-02

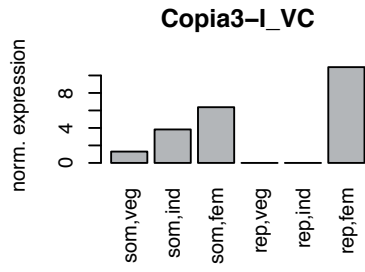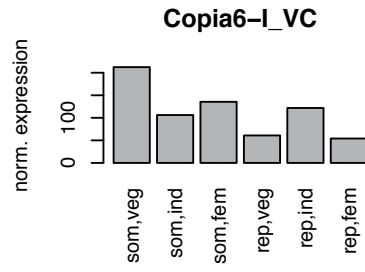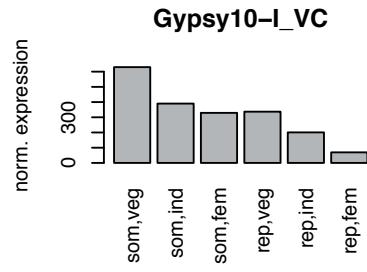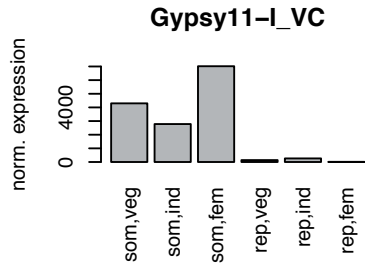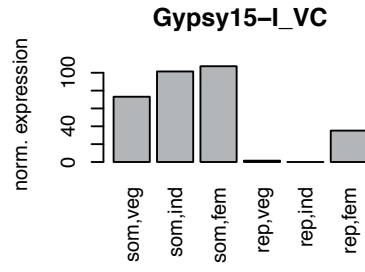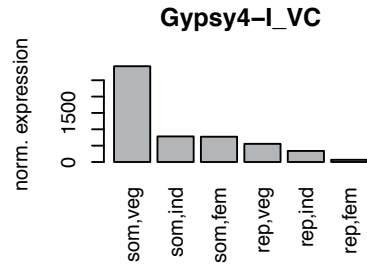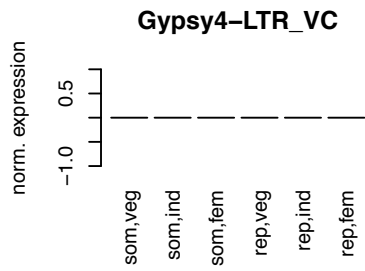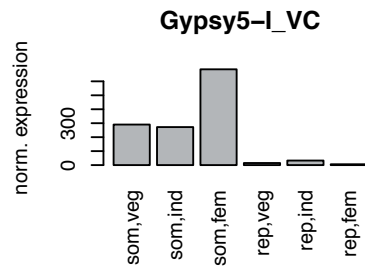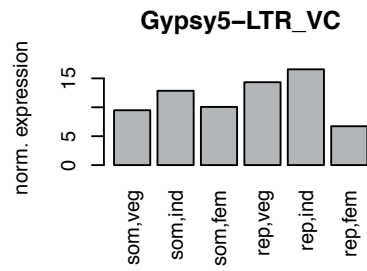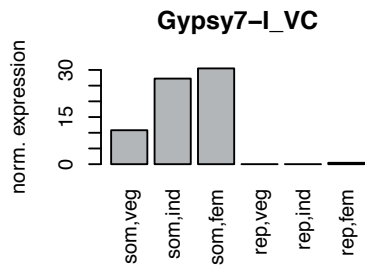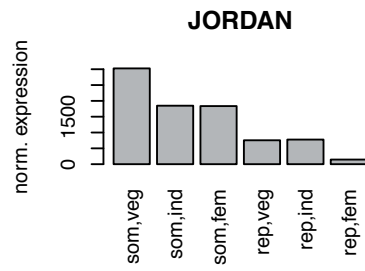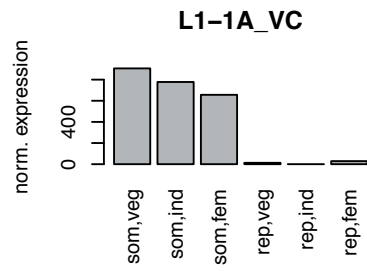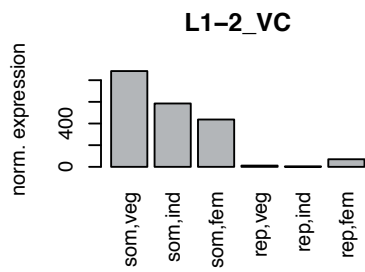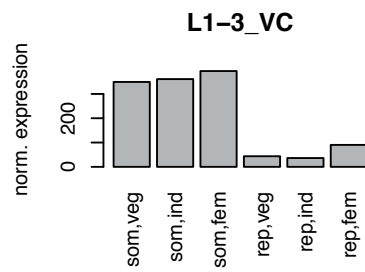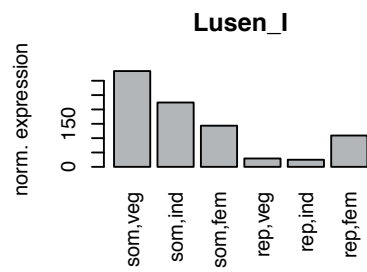

Supplement: 12864_2016_3202_MOESM7_ESM.pdf [file 12864_2016_3202_MOESM7_ESM.pdf]
