# Supplementary material for: Gene silencing pathways found in the green alga Volvox carteri reveal insights into evolution and origins of small RNA systems in plants
Source: PubMed Central journal article supplement (PMC5093975; doi:10.1186/s12864-016-3202-4), 2016-11-02

A

C.reinhardtii miRNAs (miRBase 21)

Volvox miRNAs

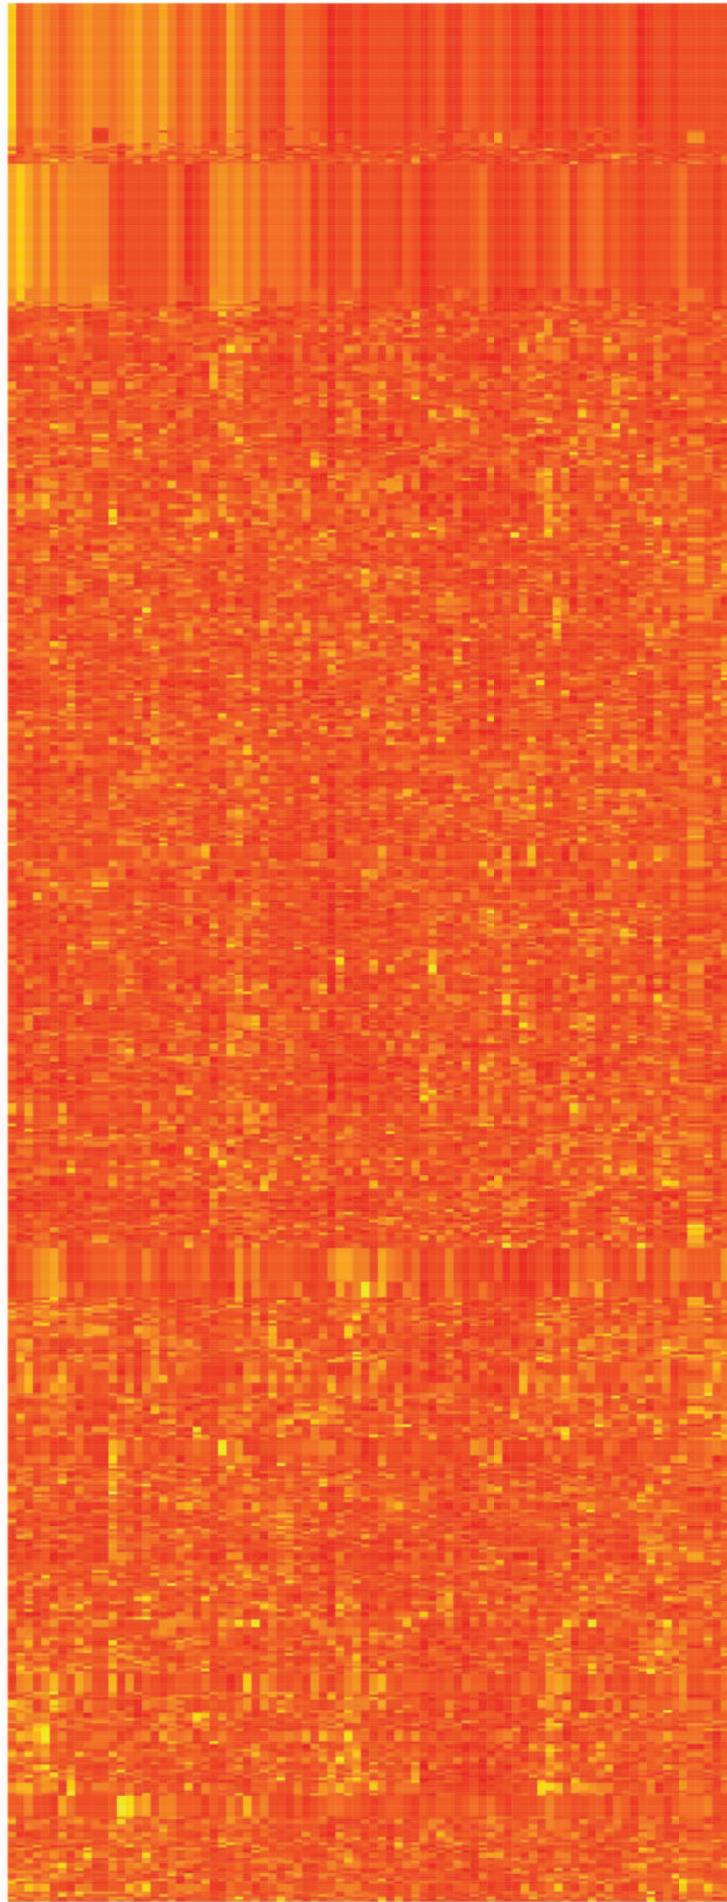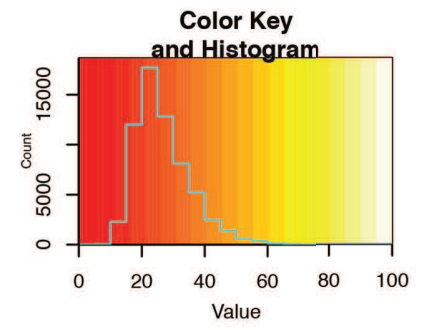

cre-miR1145.1  
cre-miR8097.5  
cre-miR1151b-3p  
cre-miR8097.3  
cre-miR8097.2  
cre-miR8097.1  
cre-miR1151a-3p  
cre-miR1151b-5p  
cre-miR1151c-3p  
cre-miR1151c-5p  
cre-miR1151d-3p  
cre-miR1151d-5p  
cre-miR1151e-3p  
cre-miR1151e-5p  
cre-miR1151f-3p  
cre-miR1151f-5p  
cre-miR1151g-3p  
cre-miR1151g-5p  
cre-miR1151h-3p  
cre-miR1151h-5p  
cre-miR1151i-3p  
cre-miR1151i-5p  
cre-miR1151j-3p  
cre-miR1151j-5p  
cre-miR1151k-3p  
cre-miR1151k-5p  
cre-miR1151l-3p  
cre-miR1151l-5p  
cre-miR1151m-3p  
cre-miR1151m-5p  
cre-miR1151n-3p  
cre-miR1151n-5p  
cre-miR1151o-3p  
cre-miR1151o-5p  
cre-miR1151p-3p  
cre-miR1151p-5p  
cre-miR1151q-3p  
cre-miR1151q-5p  
cre-miR1151r-3p  
cre-miR1151r-5p  
cre-miR1151s-3p  
cre-miR1151s-5p  
cre-miR1151t-3p  
cre-miR1151t-5p  
cre-miR1151u-3p  
cre-miR1151u-5p  
cre-miR1151v-3p  
cre-miR1151v-5p  
cre-miR1151w-3p  
cre-miR1151w-5p  
cre-miR1151x-3p  
cre-miR1151x-5p  
cre-miR1151y-3p  
cre-miR1151y-5p  
cre-miR1151z-3p  
cre-miR1151z-5p

**B**liverwort *Pellia endiviifolia* miRNAs (Alaba et al.)Volvox  
miRNAs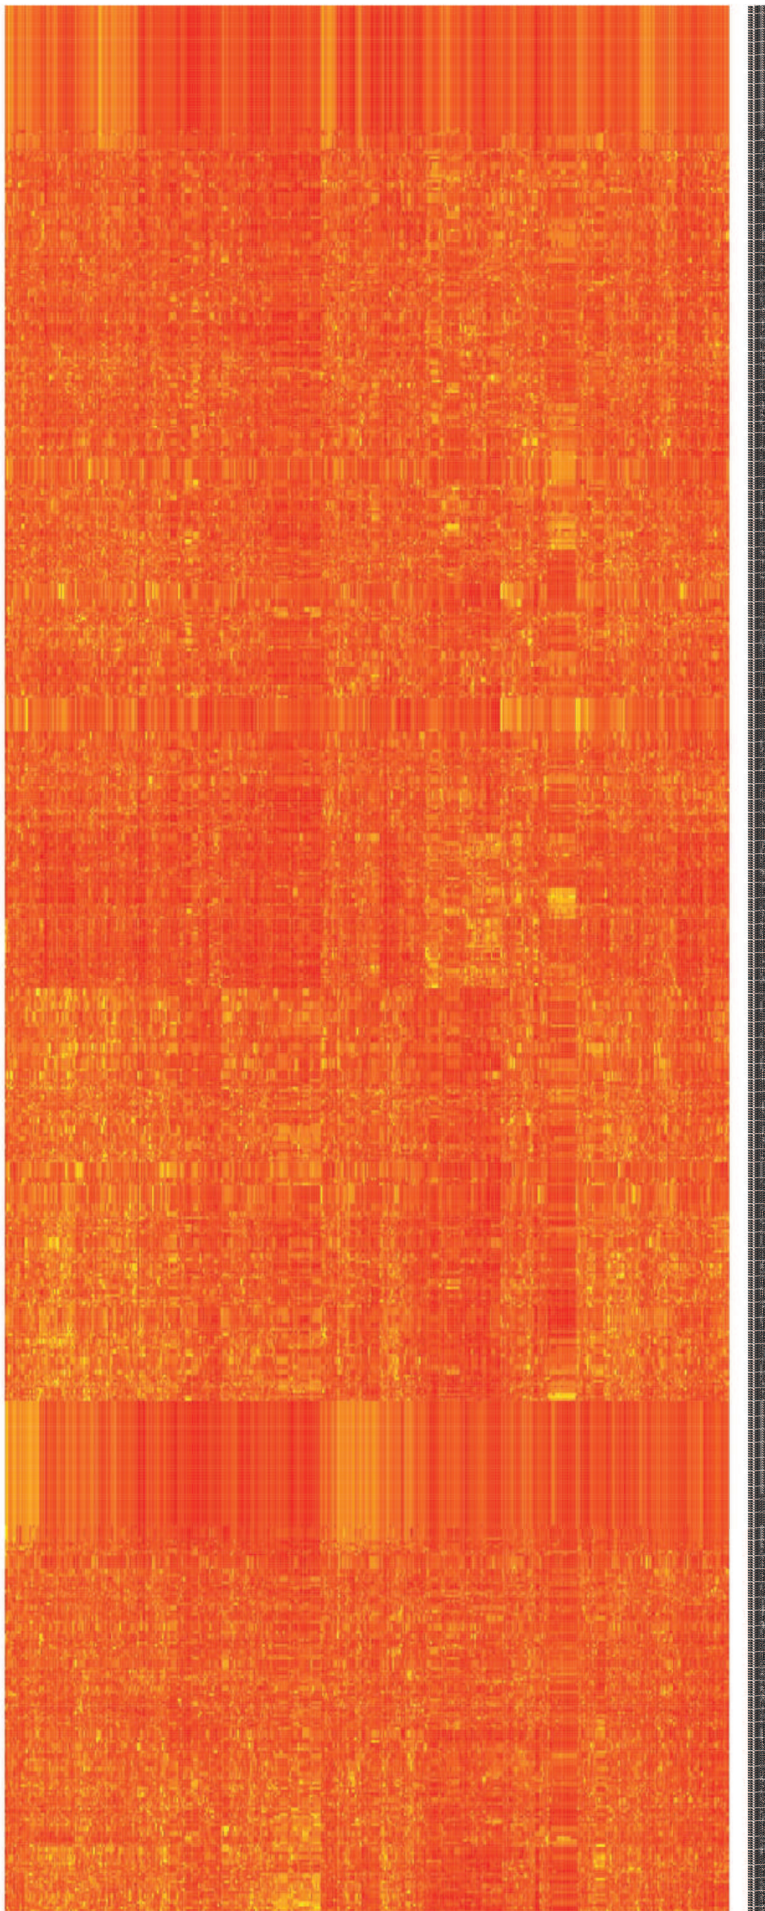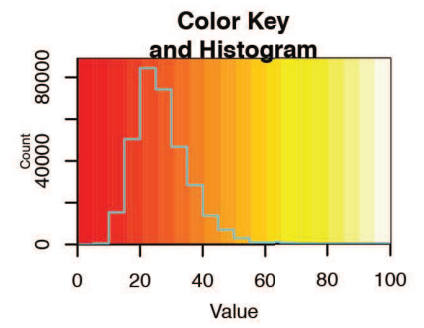

Supplement: 12864_2016_3202_MOESM8_ESM.pdf [file 12864_2016_3202_MOESM8_ESM.pdf]
